# Supplementary material for: Electrochemical regioselective C–H selenylation of 2H-indazole derivatives
Source: Royal Society of Chemistry journal article supplement (doi:10.1039/d1ob02108g), 2021-11-27

## Supporting Information

### Electrochemical Regioselective C–H Selenylation of *2H*-Indazole Derivatives

Shengsheng Lin,<sup>+</sup> Xiaomei Cheng,<sup>+</sup> Balati Hasimujiang, Zhongnan Xu, Fengtan Li,  
Zhixiong Ruan\*

Key Laboratory of Molecular Target & Clinical Pharmacology and the State & NMPA  
Key Laboratory of Respiratory Disease, School of Pharmaceutical Sciences & the  
Fifth Affiliated Hospital, Guangzhou Medical University, Guangzhou, 511436,  
P.R.China.

Email: [zruan@gzhmu.edu.cn](mailto:zruan@gzhmu.edu.cn)

<sup>+</sup> These authors contributed equally to this work.

## Table of Contents

|                                                                              |      |
|------------------------------------------------------------------------------|------|
| General Remarks                                                              | S-1  |
| Optimization Studies                                                         | S-2  |
| General Procedures for Electrochemical Reactions                             | S-3  |
| Characterization Data of Products <b>3a-3z</b> , <b>3aa</b> and <b>4a-4l</b> | S-4  |
| Radical Scavenger Experiments                                                | S-21 |
| Intermolecular Competition Experiment                                        | S-22 |
| Gram-scale Synthesis                                                         | S-22 |
| Control Experiments                                                          | S-23 |
| Cyclic Voltammetry Experiments                                               | S-24 |
| References                                                                   | S-25 |
| NMR Spectra                                                                  | S-26 |

## General Remarks

Electrochemical reactions were performed under air using undivided glassware cell. The substrate **1a–1z** and diselenides were synthesized according to previously described methods.<sup>[1-3]</sup> Other chemicals were obtained from commercial sources and were used without further purification. Platinum electrodes are commercially available from Tianjin Aida. Graphite plates are commercially available from Beijing Jinglong Special Carbon Technology Co., Ltd. Electrochemical reactions were conducted using an AXIOMET AX-3003P potentiostat in constant current mode. Yields refer to isolated compounds, estimated to be > 95% pure as determined by <sup>1</sup>H-NMR. TLC: Macherey-Nagel, TLC plates Alugram®Sil G/UV254. Detection under UV light at 254 nm. Chromatography separations were carried out on silica gel 60H (200-300 mesh) manufactured by Qingdao Haiyang Chemical Group Co. (China). High resolution mass spectrometry (HRMS) was measured on Thermo-DFS mass spectrometer. NMR spectra were recorded on JEOL 400 NMR (<sup>1</sup>H 400 MHz; <sup>13</sup>C 100 MHz; <sup>19</sup>F 376 MHz) in CDCl<sub>3</sub>. If not otherwise specified, chemical shifts (δ) are given in ppm.

## Optimization Studies

**Table S1.** Optimization of the reaction conditions<sup>a</sup>

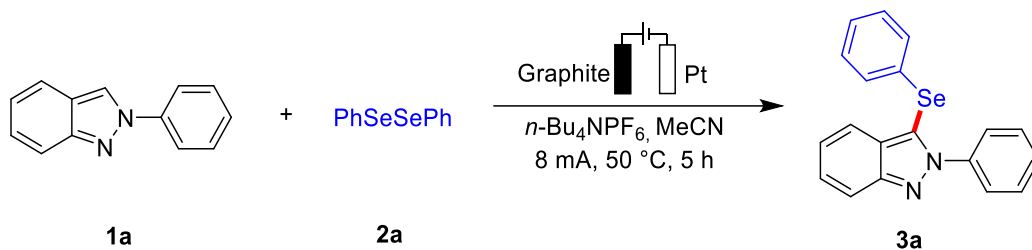

| Entry | Deviation from standard conditions                                                                | Yield (%) <sup>b</sup> |
|-------|---------------------------------------------------------------------------------------------------|------------------------|
| 1     | none                                                                                              | 85                     |
| 2     | No <i>n</i> -Bu <sub>4</sub> NPF <sub>6</sub>                                                     | 0                      |
| 3     | MeCN/DCE (2:1) as solvent                                                                         | 30                     |
| 4     | MeOH as solvent                                                                                   | 0                      |
| 5     | <i>n</i> -Bu <sub>4</sub> NClO <sub>4</sub> instead of <i>n</i> -Bu <sub>4</sub> NPF <sub>6</sub> | 29                     |
| 6     | MeCN/THF (2:1) as solvent                                                                         | 0                      |
| 7     | LiClO <sub>4</sub> instead of <i>n</i> -Bu <sub>4</sub> NPF <sub>6</sub>                          | 38                     |
| 8     | C(+)-C(-)                                                                                         | 78                     |
| 9     | Pt plate as anode                                                                                 | 31                     |
| 10    | 16 mA instead of 8 mA                                                                             | 75                     |
| 11    | MeCN/HFIP (2:1) as solvent                                                                        | trace                  |
| 12    | RT instead of 50 °C                                                                               | 21                     |
| 13    | Ni plate as cathode                                                                               | 76                     |
| 14    | 80 °C instead of 50 °C                                                                            | 50                     |
| 15    | <i>n</i> -Bu <sub>4</sub> NBF <sub>4</sub> instead of <i>n</i> -Bu <sub>4</sub> NPF <sub>6</sub>  | 22                     |
| 16    | No electricity                                                                                    | 0                      |
| 17    | <b>2a</b> (0.24 mmol) instead of <b>2a</b> (0.3 mmol)                                             | 45                     |
| 18    | <b>2a</b> (0.4 mmol) instead of <b>2a</b> (0.3 mmol)                                              | 83                     |
| 19    | 4 h instead of 5 h                                                                                | 68                     |

<sup>a</sup>Reaction conditions: undivided cell, graphite anode (1.5 cm × 1 cm × 0.2 cm), Pt cathode (1 cm × 1 cm × 0.01 cm), **1a** (0.2 mmol), **2a** (0.3 mmol), *n*-Bu<sub>4</sub>NPF<sub>6</sub> (0.5 mmol), MeCN (5.0 mL), constant current = 8.0 mA, 5 h, under air, 50 °C. <sup>b</sup>Yields of isolated products. RT = room temperature

### General Procedure for Electrochemical Reactions

**General Procedures A:** In an undivided cell (20 mL) equipped with a stirring bar, a mixture of 2*H*-Indazole derivatives (0.2 mmol), diphenyl diselenide (0.3 mmol, 93.6 mg), *n*-Bu<sub>4</sub>NPF<sub>6</sub> (0.5 mmol, 194 mg) and MeCN (5.0 mL) were added. The cell was equipped with graphite (1.5 cm × 1 cm × 0.2 cm) as the anode and platinum plate (1 cm × 1 cm × 0.01 cm) as the cathode, and connected to a DC power supply. The reaction mixture was stirred and electrolyzed at 50 °C under a constant current of 8 mA for 5 h. After the reaction was completed, the residue was purified by silica gel column chromatography to afford the desired product **3**.

**General procedure B:** In an undivided cell (20 mL) equipped with a stirring bar, a mixture of 2-Phenyl-2*H*-indazole (0.2 mmol, 38.8 mg), diphenyl diselenide derivative (0.3 mmol), *n*-Bu<sub>4</sub>NPF<sub>6</sub> (0.5 mmol, 194 mg) and MeCN (5.0 mL) were added. The battery was equipped with graphite (1.5 cm × 1 cm × 0.2 cm) as the anode and platinum plate (1 cm × 1 cm × 0.01 cm) as the cathode, and connected to a DC power supply. The reaction mixture was stirred and electrolyzed at 50 °C under a constant current of 8 mA for 5 h. After the reaction was completed, the residue was purified by silica gel column chromatography to afford the desired product **4**.

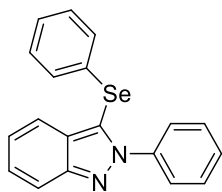

**2-Phenyl-3-(phenylselanyl)-2H-indazole (3a).** The general procedure **A** was followed using substrate **1a** (0.2 mmol, 39 mg). Isolation by column chromatography (PE/EtOAc: 30/1→15/1) yielded **3a** (60 mg, 85%) as white solid. Mp: 77.6–78.8 °C. <sup>1</sup>H NMR (400 MHz, CDCl<sub>3</sub>): δ = 7.84 (d, *J* = 8.7 Hz, 1H), 7.72 (d, *J* = 8.5 Hz, 1H), 7.54 – 7.50 (m, 2H), 7.48 – 7.44 (m, 3H), 7.40 (dd, *J* = 8.5, 7.9 Hz, 1H), 7.21 (dd, *J* = 8.7, 7.9 Hz, 1H), 7.17 – 7.09 (m, 5H). <sup>13</sup>C NMR (100 MHz, CDCl<sub>3</sub>): δ = 149.4, 140.3, 131.4, 130.5, 129.6, 129.1, 128.8, 128.1, 127.3, 127.3, 126.6, 123.5, 121.1, 120.0, 118.4. HRMS (ESI) *m/z* calcd for C<sub>19</sub>H<sub>15</sub>N<sub>2</sub>Se [M+H]<sup>+</sup> 351.0395, found 351.0397.

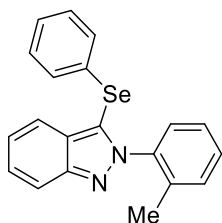

**3-(Phenylselanyl)-2-(o-tolyl)-2H-indazole (3b).** The general procedure **A** was followed using substrate **1b** (0.2 mmol, 42 mg). Isolation by column chromatography (PE/EtOAc: 30/1→15/1) yielded **3b** (54 mg, 74%) as colorless liquid. <sup>1</sup>H NMR (400 MHz, CDCl<sub>3</sub>): δ = 7.82 (d, *J* = 8.7 Hz, 1H), 7.75 (d, *J* = 8.5 Hz, 1H), 7.43 – 7.37 (m, 2H), 7.32 – 7.28 (m, 1H), 7.25 – 7.20 (m, 2H), 7.17 (m, 1H), 7.14 – 7.08 (m, 5H), 1.86 (s, 3H). <sup>13</sup>C NMR (101 MHz, CDCl<sub>3</sub>): δ = 149.3, 139.6, 135.9, 131.8, 130.8, 130.3, 129.8, 129.4, 128.0, 127.6, 127.0, 126.9, 126.1, 123.3, 121.6, 121.0, 118.5, 17.3. HRMS (ESI) *m/z* calcd for C<sub>20</sub>H<sub>17</sub>N<sub>2</sub>Se [M+H]<sup>+</sup> 365.0551, found 365.0541.

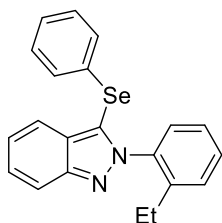

**2-(2-Ethylphenyl)-3-(phenylselanyl)-2H-indazole (3c).** The general procedure **A** was followed using substrate **1c** (0.2 mmol, 45 mg). Isolation by column chromatography (PE/EtOAc: 30/1→15/1) yielded **3c** (63 mg, 84%) as colorless liquid.

$^1\text{H}$  NMR (400 MHz,  $\text{CDCl}_3$ ):  $\delta$  = 7.82 (d,  $J$  = 8.7 Hz, 1H), 7.73 (d,  $J$  = 8.4 Hz, 1H), 7.49 – 7.36 (m, 3H), 7.25 – 7.16 (m, 3H), 7.15 – 7.11 (m, 4H), 7.07 (dd,  $J$  = 7.8, 1.2 Hz, 1H), 2.16 (q,  $J$  = 7.4 Hz, 2H), 1.00 (t,  $J$  = 7.4 Hz, 3H).  $^{13}\text{C}$  NMR (100 MHz,  $\text{CDCl}_3$ ):  $\delta$  = 149.2, 141.5, 139.0, 131.6, 130.4, 130.0, 129.4, 128.9, 128.0, 127.5, 127.0, 126.9, 126.0, 123.3, 121.8, 121.0, 118.5, 23.8, 14.3. HRMS (ESI)  $m/z$  calcd for  $\text{C}_{21}\text{H}_{19}\text{N}_2\text{Se}$   $[\text{M}+\text{H}]^+$  379.0708, found 379.0702.

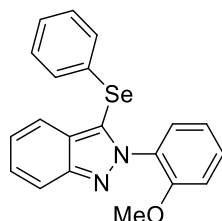

**2-(2-Methoxyphenyl)-3-(phenylselanyl)-2H-indazole (3d).** The general procedure A was followed using substrate **1d** (0.2 mmol, 45 mg). Isolation by column chromatography (PE/EtOAc: 30/1→15/1) yielded **3d** (46 mg, 60%) as colorless liquid.  $^1\text{H}$  NMR (400 MHz,  $\text{CDCl}_3$ ):  $\delta$  = 7.82 (d,  $J$  = 8.7 Hz, 1H), 7.66 (d,  $J$  = 8.5 Hz, 1H), 7.49 – 7.44 (m, 1H), 7.40 (dd,  $J$  = 8.5, 7.4 Hz, 1H), 7.32 (dd,  $J$  = 7.9, 1.8 Hz, 1H), 7.20 – 7.10 (m, 6H), 7.08 – 6.98 (m, 2H), 3.59 (s, 3H).  $^{13}\text{C}$  NMR (100 MHz,  $\text{CDCl}_3$ ):  $\delta$  = 154.7, 149.5, 131.1, 130.9, 130.8, 130.7, 129.4, 129.2, 129.0, 127.0, 126.9, 123.1, 122.5, 121.0, 120.5, 118.5, 111.7, 55.6. HRMS (ESI)  $m/z$  calcd for  $\text{C}_{20}\text{H}_{17}\text{N}_2\text{OSe}$   $[\text{M}+\text{H}]^+$  381.0501, found 381.0493.

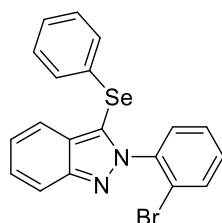

**2-(2-Bromophenyl)-3-(phenylselanyl)-2H-indazole (3e).** The general procedure A was followed using substrate **1e** (0.2 mmol, 55 mg). Isolation by column chromatography (PE/EtOAc: 30/1→15/1) yielded **3e** (38 mg, 44%) as yellow oil.  $^1\text{H}$  NMR (400 MHz,  $\text{CDCl}_3$ ):  $\delta$  = 7.83 (d,  $J$  = 8.8 Hz, 1H), 7.72 (d,  $J$  = 7.7 Hz, 2H), 7.45 – 7.32 (m, 3H), 7.25 – 7.19 (m, 2H), 7.15 (d,  $J$  = 6.8 Hz, 5H).  $^{13}\text{C}$  NMR (100 MHz,  $\text{CDCl}_3$ ):  $\delta$  = 149.6, 139.9, 133.3, 131.4, 131.2, 130.5, 129.8, 129.4, 127.8, 127.5, 127.4, 127.0, 123.6, 122.4, 122.3, 121.1, 118.6. HRMS (ESI)  $m/z$  calcd for  $\text{C}_{19}\text{H}_{14}\text{BrN}_2\text{Se}$   $[\text{M}+\text{H}]^+$  428.9500, found 428.9494.

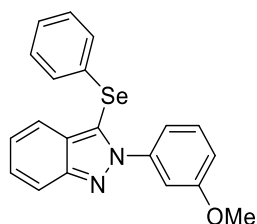

**2-(3-Methoxyphenyl)-3-(phenylselanyl)-2H-indazole (3f).** The general procedure A was followed using substrate **1f** (0.2 mmol, 45 mg). Isolation by column chromatography (PE/EtOAc: 30/1→15/1) yielded **3f** (52 mg, 68%) as yellow oil.  $^1\text{H}$  NMR (400 MHz,  $\text{CDCl}_3$ ):  $\delta$  = 7.86 (d,  $J$  = 8.7 Hz, 1H), 7.73 (d,  $J$  = 8.6 Hz, 1H), 7.41 (dd,  $J$  = 8.6, 7.5, 1H), 7.36 (t,  $J$  = 8.2 Hz, 1H), 7.21 (dd,  $J$  = 8.7, 7.5, 1H), 7.15 – 7.12 (m, 6H), 7.07 – 7.04 (m, 1H), 7.01 (dd,  $J$  = 8.5, 1.3 Hz, 1H), 3.70 (s, 3H).  $^{13}\text{C}$  NMR (100 MHz,  $\text{CDCl}_3$ ):  $\delta$  = 159.7, 149.2, 141.2, 131.5, 130.2, 129.5, 129.4, 128.2, 127.3, 127.1, 123.5, 121.0, 119.8, 118.8, 118.3, 115.6, 111.6, 55.4. HRMS (ESI)  $m/z$  calcd for  $\text{C}_{20}\text{H}_{17}\text{N}_2\text{OSe}$   $[\text{M}+\text{H}]^+$  381.0501, found 381.0501. Analytical data for compound **3f** was consistent with the literature.<sup>[1]</sup>

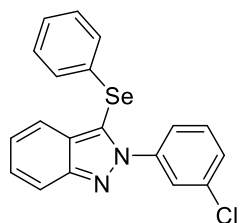

**2-(3-Chlorophenyl)-3-(phenylselanyl)-2H-indazole (3g).** The general procedure A was followed using substrate **1g** (0.2 mmol, 46 mg). Isolation by column chromatography (PE/EtOAc: 30/1→15/1) yielded **3g** (70 mg, 91%) as colorless liquid.  $^1\text{H}$  NMR (400 MHz,  $\text{CDCl}_3$ ):  $\delta$  = 7.82 (d,  $J$  = 8.7 Hz, 1H), 7.72 (d,  $J$  = 8.4 Hz, 1H), 7.49 – 7.45 (m, 2H), 7.44 – 7.38 (m, 3H), 7.22 (dd,  $J$  = 8.7, 7.4, 1H), 7.14 (m, 5H).  $^{13}\text{C}$  NMR (100 MHz,  $\text{CDCl}_3$ ):  $\delta$  = 149.5, 138.8, 135.1, 131.2, 130.4, 129.8, 129.7, 129.0, 128.4, 127.8, 127.6, 127.4, 123.8, 122.2, 121.1, 120.1, 118.4. HRMS (ESI)  $m/z$  calcd for  $\text{C}_{19}\text{H}_{14}\text{ClN}_2\text{Se}$   $[\text{M}+\text{H}]^+$  385.0005, found 384.9994. Analytical data for compound **3g** was consistent with the literature.<sup>[1]</sup>

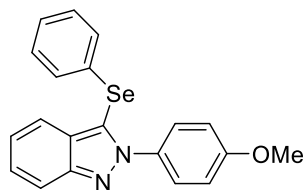

**2-(4-Methoxyphenyl)-3-(phenylselanyl)-2H-indazole (3h).** The general procedure **A** was followed using substrate **1h** (0.2 mmol, 45 mg). Isolation by column chromatography (PE/EtOAc: 30/1→15/1) yielded **3h** (51 mg, 67%) as colorless liquid.  $^1\text{H}$  NMR (400 MHz,  $\text{CDCl}_3$ ):  $\delta$  = 7.82 (d,  $J$  = 8.7 Hz, 1H), 7.69 (d,  $J$  = 8.3 Hz, 1H), 7.44 – 7.36 (m, 3H), 7.22 – 7.10 (m, 6H), 6.98 – 6.93 (m, 2H), 3.86 (s, 3H).  $^{13}\text{C}$  NMR (100 MHz,  $\text{CDCl}_3$ ):  $\delta$  = 160.0, 149.2, 133.5, 131.5, 130.4, 129.6, 128.0, 127.8, 127.2, 127.2, 123.4, 121.1, 120.1, 118.3, 113.9, 55.7. HRMS (ESI)  $m/z$  calcd for  $\text{C}_{20}\text{H}_{17}\text{N}_2\text{OSe}$   $[\text{M}+\text{H}]^+$  381.0501, found 381.0500. Analytical data for compound **3h** was consistent with the literature.<sup>[1]</sup>

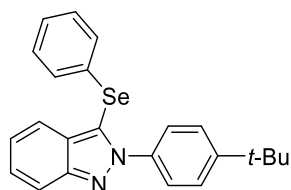

**2-(4-(tert-Butyl)phenyl)-3-(phenylselanyl)-2H-indazole (3i).** The general procedure **A** was followed using substrate **1i** (0.2 mmol, 50 mg). Isolation by column chromatography (PE/EtOAc: 30/1→15/1) yielded **3i** (80 mg, 90%) as colorless liquid.  $^1\text{H}$  NMR (400 MHz,  $\text{CDCl}_3$ ):  $\delta$  = 7.84 (d,  $J$  = 8.7 Hz, 1H), 7.70 (d,  $J$  = 8.5 Hz, 1H), 7.49 – 7.44 (m, 4H), 7.42 – 7.36 (m, 1H), 7.22 – 7.12 (m, 6H), 1.37 (s, 9H).  $^{13}\text{C}$  NMR (100 MHz,  $\text{CDCl}_3$ ):  $\delta$  = 152.2, 149.3, 137.8, 131.5, 130.4, 129.5, 128.0, 127.1, 126.0, 125.7, 123.4, 121.1, 119.7, 118.4, 34.9, 31.4. HRMS (ESI)  $m/z$  calcd for  $\text{C}_{23}\text{H}_{23}\text{N}_2\text{Se}$   $[\text{M}+\text{H}]^+$  407.1021, found 407.1019.

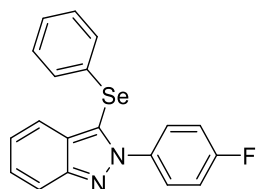

**2-(4-Fluorophenyl)-3-(phenylselanyl)-2H-indazole (3j).** The general procedure **A** was followed using substrate **1j** (0.2 mmol, 42 mg). Isolation by column chromatography (PE/EtOAc: 30/1→15/1) yielded **3j** (59 mg, 80%) as colorless liquid.

$^1\text{H}$  NMR (400 MHz,  $\text{CDCl}_3$ ):  $\delta$  = 7.82 (d,  $J$  = 8.7 Hz, 1H), 7.72 (d,  $J$  = 8.4 Hz, 1H), 7.50 – 7.45 (m, 2H), 7.40 (dd,  $J$  = 8.4, 7.5, 1H), 7.22 (dd,  $J$  = 8.7, 7.5, 1H), 7.19 – 7.08 (m, 7H).  $^{13}\text{C}$  NMR (100 MHz,  $\text{CDCl}_3$ ):  $\delta$  = 162.8 (d,  $^1J_{\text{C-F}}$  = 249.2 Hz), 149.4, 136.4 (d,  $^4J_{\text{C-F}}$  = 3.2 Hz), 131.2, 130.5, 129.6, 128.4 (d,  $^3J_{\text{C-F}}$  = 8.2 Hz), 128.2, 127.5, 127.4, 123.7, 121.1, 120.3, 118.4, 115.8 (d,  $^2J_{\text{C-F}}$  = 23.1 Hz).  $^{19}\text{F}$  NMR (376 MHz,  $\text{CDCl}_3$ ):  $\delta$  = -111.73. HRMS (ESI)  $m/z$  calcd for  $\text{C}_{19}\text{H}_{14}\text{FN}_2\text{Se}$   $[\text{M}+\text{H}]^+$  369.0301, found 369.0296.

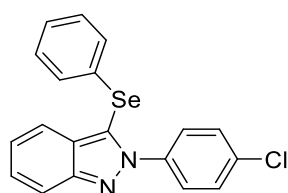

**2-(4-Chlorophenyl)-3-(phenylselanyl)-2H-indazole (3k).** The general procedure A was followed using substrate **1k** (0.2 mmol, 46 mg). Isolation by column chromatography (PE/EtOAc: 30/1→15/1) yielded **3k** (58 mg, 76%) as yellow oil.  $^1\text{H}$  NMR (400 MHz,  $\text{CDCl}_3$ )  $\delta$  = 7.82 (d,  $J$  = 8.7 Hz, 1H), 7.74 (d,  $J$  = 8.5 Hz, 1H), 7.57 – 7.51 (m, 1H), 7.46 – 7.34 (m, 4H), 7.25 – 7.20 (m, 1H), 7.20 – 7.11 (m, 5H).  $^{13}\text{C}$  NMR (100 MHz,  $\text{CDCl}_3$ ):  $\delta$  = 149.4, 141.2, 134.4, 131.0, 130.7, 129.7, 129.6, 129.2, 128.3, 127.6, 127.5, 126.9, 124.7, 123.8, 121.1, 120.3, 118.4. HRMS (ESI)  $m/z$  calcd for  $\text{C}_{19}\text{H}_{14}\text{ClN}_2\text{Se}$   $[\text{M}+\text{H}]^+$  385.0005, found 385.0000.

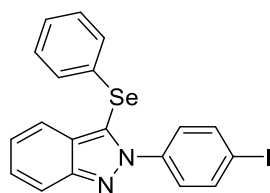

**2-(4-Iodophenyl)-3-(phenylselanyl)-2H-indazole (3l).** The general procedure A was followed using substrate **1l** (0.2 mmol, 64 mg). Isolation by column chromatography (PE/EtOAc: 30/1→15/1) yielded **3l** (83 mg, 87%) as white solid. Mp: 84.2–86.3 °C.  $^1\text{H}$  NMR (400 MHz,  $\text{CDCl}_3$ ):  $\delta$  = 7.72 (d,  $J$  = 8.8 Hz, 1H), 7.68 (d,  $J$  = 8.6 Hz, 2H), 7.61 (d,  $J$  = 8.5 Hz, 1H), 7.30 (dd,  $J$  = 8.5, 7.4 Hz, 1H), 7.18 (d,  $J$  = 8.6 Hz, 2H), 7.11 (dd,  $J$  = 8.8, 7.4 Hz, 1H), 7.09 – 6.97 (m, 5H).  $^{13}\text{C}$  NMR (100 MHz,  $\text{CDCl}_3$ ):  $\delta$  = 149.5, 140.0, 137.9, 131.2, 130.4, 129.7, 128.4, 128.2, 127.6, 127.4, 123.8, 121.1, 119.9, 118.4, 94.7. HRMS (ESI)  $m/z$  calcd for  $\text{C}_{19}\text{H}_{14}\text{IN}_2\text{Se}$   $[\text{M}+\text{H}]^+$  476.9361, found 476.9358.

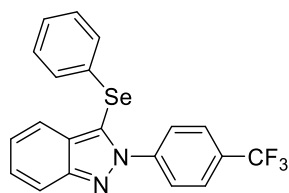

**3-(Phenylselanyl)-2-(4-(trifluoromethyl)phenyl)-2H-indazole (3m).** The general procedure **A** was followed using substrate **1m** (0.2 mmol, 52 mg). Isolation by column chromatography (PE/EtOAc: 30/1→15/1) yielded **3m** (79 mg, 95%) as white solid. Mp: 108.9–109.9 °C. <sup>1</sup>H NMR (400 MHz, CDCl<sub>3</sub>): δ = 7.83 (d, *J* = 8.8 Hz, 1H), 7.76 – 7.67 (m, 5H), 7.42 (dd, *J* = 8.8, 7.6 Hz, 1H), 7.23 (dd, *J* = 8.5, 7.6 Hz, 1H), 7.20 – 7.09 (m, 5H). <sup>13</sup>C NMR (100 MHz, CDCl<sub>3</sub>): δ = 149.6, 143.0, 131.0, 130.9 (q, <sup>2</sup>*J*<sub>C-F</sub> = 32.3 Hz), 130.4, 129.7, 128.6, 127.8, 127.5, 126.9, 126.0 (q, <sup>3</sup>*J*<sub>C-F</sub> = 3.4 Hz), 124.0, 123.8 (q, <sup>1</sup>*J*<sub>C-F</sub> = 272.2 Hz), 121.1, 120.1, 118.4. <sup>19</sup>F NMR (376 MHz, CDCl<sub>3</sub>): δ = -62.42. HRMS (ESI) *m/z* calcd for C<sub>20</sub>H<sub>14</sub>F<sub>3</sub>N<sub>2</sub>OSe [M+H]<sup>+</sup> 419.0269, found 419.0262.

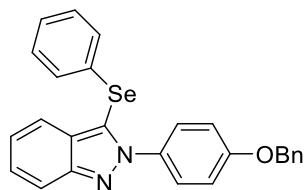

**2-(4-(Benzyloxy)phenyl)-3-(phenylselanyl)-2H-indazole (3n).** The general procedure **A** was followed using substrate **1n** (0.2 mmol, 60 mg). Isolation by column chromatography (PE/EtOAc: 30/1→15/1) yielded **3n** (85 mg, 93%) as yellow solid. Mp: 106.6–108.8 °C. <sup>1</sup>H NMR (400 MHz, CDCl<sub>3</sub>): δ = 7.86 (d, *J* = 8.7 Hz, 1H), 7.66 (d, *J* = 8.5 Hz, 1H), 7.45 – 7.34 (m, 3H), 7.26 – 7.21 (m, 3H), 7.20 – 7.12 (m, 4H), 7.12 – 7.08 (m, 2H), 7.08 – 7.01 (m, 4H), 4.99 (s, 2H). <sup>13</sup>C NMR (100 MHz, CDCl<sub>3</sub>): δ = 153.8, 149.5, 136.4, 131.0, 131.0, 130.8, 130.0, 129.2, 129.1, 127.8, 127.0, 126.9, 126.7, 123.0, 122.6, 121.0, 120.9, 118.4, 113.8, 70.6. HRMS (ESI) *m/z* calcd for C<sub>26</sub>H<sub>21</sub>N<sub>2</sub>OSe [M+H]<sup>+</sup> 457.0814, found 457.0808.

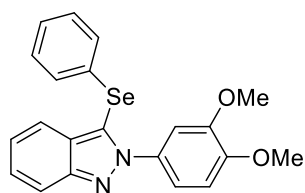

**2-(3,4-Dimethoxyphenyl)-3-(phenylselanyl)-2H-indazole (3o).** The general procedure **A** was followed using substrate **1o** (0.2 mmol, 51 mg). Isolation by column chromatography (PE/EtOAc: 30/1→15/1) yielded **3o** (51 mg, 62%) as white solid. Mp: 131.6–133.4 °C. <sup>1</sup>H NMR (400 MHz, CDCl<sub>3</sub>): δ = 7.83 (d, *J* = 8.6 Hz, 1H), 7.71 (d, *J* = 8.5 Hz, 1H), 7.40 (ddd, *J* = 8.6, 8.5, 1.1 Hz, 1H), 7.21 (ddd, *J* = 8.6, 8.5, 1.1 Hz, 1H), 7.18 – 7.11 (m, 5H), 7.08 (dd, *J* = 8.6, 2.5 Hz, 1H), 6.94 (d, *J* = 2.5 Hz, 1H), 6.91 (d, *J* = 8.6 Hz, 1H), 3.94 (s, 3H), 3.67 (s, 3H). <sup>13</sup>C NMR (100 MHz, CDCl<sub>3</sub>): δ = 149.9, 149.5, 149.1, 133.8, 132.2, 130.5, 129.9, 128.6, 127.6, 127.5, 123.9, 121.4, 120.2, 119.1, 118.7, 110.8, 110.4, 56.6, 56.2. HRMS (ESI) *m/z* calcd for C<sub>21</sub>H<sub>19</sub>N<sub>2</sub>O<sub>2</sub>Se [M+H]<sup>+</sup> 411.0606, found 411.0608.

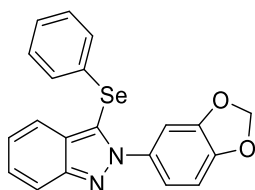

**2-(Benzo[d][1,3]dioxol-5-yl)-3-(phenylselanyl)-2H-indazole (3p).** The general procedure **A** was followed using substrate **1p** (0.2 mmol, 48 mg). Isolation by column chromatography (PE/EtOAc: 30/1→15/1) yielded **3p** (61 mg, 77%) as colorless liquid. <sup>1</sup>H NMR (400 MHz, CDCl<sub>3</sub>): δ = 7.81 (d, *J* = 8.7 Hz, 1H), 7.68 (d, *J* = 8.4 Hz, 1H), 7.39 (dd, *J* = 8.4, 7.6 Hz, 1H), 7.22 – 7.12 (m, 6H), 6.97 – 6.93 (m, 2H), 6.84 (d, *J* = 8.0 Hz, 1H), 6.05 (s, 2H). <sup>13</sup>C NMR (100 MHz, CDCl<sub>3</sub>): δ = 149.2, 148.3, 147.7, 134.4, 131.3, 130.5, 129.6, 128.0, 127.3, 127.3, 123.5, 121.1, 120.5, 120.3, 118.3, 107.9, 107.8, 102.1. HRMS (ESI) *m/z* calcd for C<sub>20</sub>H<sub>15</sub>N<sub>2</sub>O<sub>2</sub>Se [M+H]<sup>+</sup> 395.0293, found 395.0289.

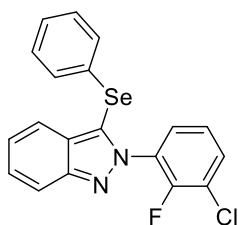

**2-(3-Chloro-2-fluorophenyl)-3-(phenylselanyl)-2H-indazole (3q).** The general procedure **A** was followed using substrate **1q** (0.2 mmol, 53 mg). Isolation by column chromatography (PE/EtOAc: 30/1→15/1) yielded **3q** (32 mg, 40%) as colorless liquid. <sup>1</sup>H NMR (400 MHz, CDCl<sub>3</sub>): δ = 7.81 (d, *J* = 8.7 Hz, 1H), 7.72 (d, *J* = 8.6 Hz, 1H),

7.54 (ddd,  $J = 8.6, 7.3, 1.3$  Hz, 1H), 7.41 (ddd,  $J = 8.6, 7.3, 1.3$  Hz, 1H), 7.28 – 7.19 (m, 2H), 7.19 – 7.07 (m, 6H).  $^{13}\text{C}$  NMR (100 MHz,  $\text{CDCl}_3$ ):  $\delta = 153.4$  (d,  $^1J_{\text{C-F}} = 254.8$  Hz), 149.9, 131.9, 131.1, 130.1, 129.6 (d,  $^3J_{\text{C-F}} = 12.7$  Hz), 129.5, 127.7 (d,  $^2J_{\text{C-F}} = 21.2$  Hz), 127.7, 127.2, 124.4 (d,  $^4J_{\text{C-F}} = 3.9$  Hz), 123.8, 122.7, 122.4 (d,  $^3J_{\text{C-F}} = 13.7$  Hz), 121.0, 118.4.  $^{19}\text{F}$  NMR (376 MHz,  $\text{CDCl}_3$ ):  $\delta = -120.74$ . HRMS (ESI)  $m/z$  calcd for  $\text{C}_{19}\text{H}_{13}\text{ClFN}_2\text{Se}$   $[\text{M}+\text{H}]^+$  402.9911, found 402.9905.

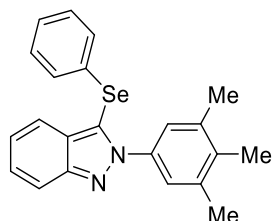

**3-(Phenylselanyl)-2-(3,4,5-trimethylphenyl)-2H-indazole (3r).** The general procedure **A** was followed using substrate **1r** (0.2 mmol, 47 mg). Isolation by column chromatography (PE/EtOAc: 30/1→15/1) yielded **3r** (54 mg, 69%) as white solid. Mp: 114.3–116.9 °C.  $^1\text{H}$  NMR (400 MHz,  $\text{CDCl}_3$ ):  $\delta = 7.82$  (d,  $J = 8.7$  Hz, 1H), 7.70 (d,  $J = 8.5$  Hz, 1H), 7.38 (dd,  $J = 8.5, 7.4$  Hz, 1H), 7.22 – 7.15 (m, 6H), 7.10 (s, 2H), 2.28 (s, 6H), 2.23 (s, 3H).  $^{13}\text{C}$  NMR (100 MHz,  $\text{CDCl}_3$ ):  $\delta = 149.1, 137.3, 137.0, 136.3, 131.9, 130.6, 129.5, 128.0, 127.2, 127.0, 125.3, 123.3, 121.0, 119.9, 118.3, 20.7, 15.5$ . HRMS (ESI)  $m/z$  calcd for  $\text{C}_{22}\text{H}_{21}\text{N}_2\text{Se}$   $[\text{M}+\text{H}]^+$  393.0864, found 393.0861.

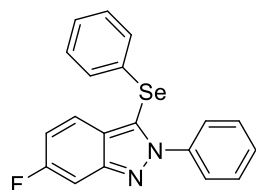

**6-Fluoro-2-phenyl-3-(phenylselanyl)-2H-indazole (3s).** The general procedure **A** was followed using substrate **1s** (0.2 mmol, 42 mg). Isolation by column chromatography (PE/EtOAc: 30/1→15/1) yielded **3s** (55 mg, 72%) as colorless liquid.  $^1\text{H}$  NMR (400 MHz,  $\text{CDCl}_3$ ):  $\delta = 7.65$  (dd,  $J = 9.1, 5.3$  Hz, 1H), 7.52 – 7.45 (m, 5H), 7.40 (dd,  $J = 9.7, 2.2$  Hz, 1H), 7.20 – 7.09 (m, 5H), 6.99 (ddd,  $J = 9.7, 9.6, 2.4$  Hz, 1H).  $^{13}\text{C}$  NMR (100 MHz,  $\text{CDCl}_3$ ):  $\delta = 162.7$  (d,  $^1J_{\text{C-F}} = 245.4$  Hz), 149.4 (d,  $^3J_{\text{C-F}} = 13.3$  Hz), 140.5, 131.2, 131.1, 130.0, 129.6, 129.2, 127.8, 126.8, 125.5, 123.4 (d,  $^3J_{\text{C-F}} = 11.0$  Hz), 121.3, 115.5 (d,  $^2J_{\text{C-F}} = 28.2$  Hz), 101.8 (d,  $^2J_{\text{C-F}} = 23.8$  Hz).  $^{19}\text{F}$  NMR

(376 MHz, CDCl<sub>3</sub>):  $\delta$  = -112.68. HRMS (ESI)  $m/z$  calcd for C<sub>19</sub>H<sub>14</sub>FN<sub>2</sub>Se [M+H]<sup>+</sup> 369.0301, found 369.0303.

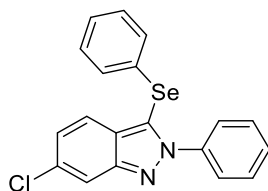

**6-Chloro-2-phenyl-3-(phenylselanyl)-2H-indazole (3t).** The general procedure A was followed using substrate **1t** (0.2 mmol, 46 mg). Isolation by column chromatography (PE/EtOAc: 30/1→15/1) yielded **3t** (51 mg, 66%) as white solid. Mp: 77.6–79.5 °C. <sup>1</sup>H NMR (400 MHz, CDCl<sub>3</sub>):  $\delta$  = 7.80 (s, 1H), 7.62 (d,  $J$  = 8.9 Hz, 1H), 7.51 – 7.45 (m, 5H), 7.22 – 7.09 (m, 6H). <sup>13</sup>C NMR (100 MHz, CDCl<sub>3</sub>):  $\delta$  = 149.4, 140.1, 133.2, 130.8, 130.8, 129.7, 129.4, 128.9, 127.6, 126.5, 126.4, 125.0, 122.5, 121.1, 117.3. HRMS (ESI)  $m/z$  calcd for C<sub>19</sub>H<sub>14</sub>ClN<sub>2</sub>Se [M+H]<sup>+</sup> 385.0005, found 384.9992.

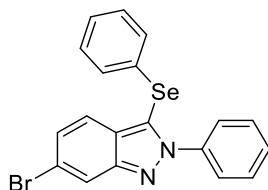

**6-Bromo-2-phenyl-3-(phenylselanyl)-2H-indazole (3u).** The general procedure A was followed using substrate **1u** (0.2 mmol, 55 mg). Isolation by column chromatography (PE/EtOAc: 30/1→15/1) yielded **3u** (51 mg, 60%) as white solid. Mp: 71.5–74.2 °C. <sup>1</sup>H NMR (400 MHz, CDCl<sub>3</sub>):  $\delta$  = 8.00 (s, 1H), 7.56 (d,  $J$  = 8.9 Hz, 1H), 7.51 – 7.45 (m, 5H), 7.29 – 7.23 (m, 1H), 7.19 – 7.09 (m, 5H). <sup>13</sup>C NMR (100 MHz, CDCl<sub>3</sub>):  $\delta$  = 149.9, 140.1, 130.8, 130.8, 129.7, 129.4, 128.9, 127.6, 127.3, 126.6, 126.5, 122.6, 121.3, 121.2, 120.7. HRMS (ESI)  $m/z$  calcd for C<sub>19</sub>H<sub>14</sub>BrN<sub>2</sub>Se [M+H]<sup>+</sup> 428.9500, found 428.9492.

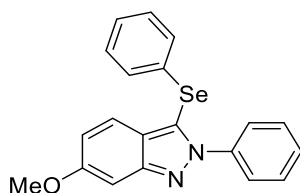

**6-Methoxy-2-phenyl-3-(phenylselanyl)-2H-indazole (3v).** The general procedure A was followed using substrate **1v** (0.2 mmol, 45 mg). Isolation by column chromatography (PE/EtOAc: 30/1→15/1) yielded **3v** (33 mg, 44%) as colorless liquid. <sup>1</sup>H NMR (400 MHz, CDCl<sub>3</sub>): δ = 8.42 (s, 1H), 7.80 (d, *J* = 8.2 Hz, 2H), 7.75 (d, *J* = 9.1 Hz, 1H), 7.45 (m, 4H), 7.35 (tt, *J* = 7.4, 1.3 Hz, 1H), 7.18 – 7.13 (m, 3H), 7.03 (d, *J* = 9.1 Hz, 1H), 3.90 (s, 3H). <sup>13</sup>C NMR (100 MHz, CDCl<sub>3</sub>): δ = 158.9, 151.9, 140.6, 132.5, 131.1, 129.5, 128.8, 127.9, 126.0, 122.8, 121.2, 121.1, 119.4, 112.6, 102.7, 57.7. HRMS (ESI) *m/z* calcd for C<sub>20</sub>H<sub>17</sub>N<sub>2</sub>OSe [M+H]<sup>+</sup> 381.0501, found 381.0496.

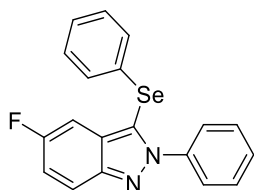

**5-Fluoro-2-phenyl-3-(phenylselanyl)-2H-indazole (3w).** The general procedure A was followed using substrate **1w** (0.2 mmol, 42 mg). Isolation by column chromatography (PE/EtOAc: 30/1→15/1) yielded **3w** (70 mg, 95%) as white solid. Mp: 81.7–83.5 °C. <sup>1</sup>H NMR (400 MHz, CDCl<sub>3</sub>): δ = 7.81 (dd, *J* = 9.1, 4.5 Hz, 1H), 7.54 – 7.44 (m, 5H), 7.29 (dd, *J* = 8.9, 2.6 Hz, 1H), 7.23 – 7.09 (m, 6H). <sup>13</sup>C NMR (100 MHz, CDCl<sub>3</sub>): δ = 159.4 (d, <sup>1</sup>*J*<sub>C-F</sub> = 243.0 Hz), 146.7, 140.2, 131.1, 130.5, 129.6, 129.3, 128.9, 128.0 (d, <sup>3</sup>*J*<sub>C-F</sub> = 12.4 Hz), 127.4, 126.5, 120.6 (d, <sup>3</sup>*J*<sub>C-F</sub> = 10.2 Hz), 120.1 (d, <sup>4</sup>*J*<sub>C-F</sub> = 6.9 Hz), 119.0 (d, <sup>2</sup>*J*<sub>C-F</sub> = 27.3 Hz), 103.7 (d, <sup>2</sup>*J*<sub>C-F</sub> = 24.8 Hz). <sup>19</sup>F NMR (376 MHz, CDCl<sub>3</sub>): δ = -117.05. HRMS (ESI) *m/z* calcd for C<sub>19</sub>H<sub>14</sub>FN<sub>2</sub>Se [M+H]<sup>+</sup> 369.0301, found 369.0297.

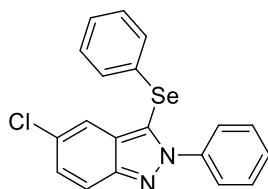

**5-Chloro-2-phenyl-3-(phenylselanyl)-2H-indazole (3x).** The general procedure A was followed using substrate **1x** (0.2 mmol, 46 mg). Isolation by column chromatography (PE/EtOAc: 30/1→15/1) yielded **3x** (70 mg, 91%) as white solid. Mp: 108.9–109.8 °C. <sup>1</sup>H NMR (400 MHz, CDCl<sub>3</sub>): δ = 7.76 (d, *J* = 9.1 Hz, 1H), 7.69 (s, 1H), 7.53 – 7.43 (m, 5H), 7.32 (dd, *J* = 9.1, 1.9 Hz, 1H), 7.22 – 7.13 (m, 3H), 7.13 – 7.08 (m, 2H). <sup>13</sup>C NMR (100 MHz, CDCl<sub>3</sub>): δ = 147.7, 140.1, 130.9, 130.6, 129.7,

129.4, 129.3, 128.9, 128.8, 128.7, 127.5, 126.5, 120.0, 119.9, 119.9. HRMS (ESI)  $m/z$  calcd for  $C_{19}H_{14}ClN_2Se$   $[M+H]^+$  385.0005, found 385.0006. Analytical data for compound **3x** was consistent with the literature.<sup>[1]</sup>

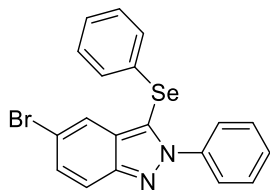

**5-Bromo-2-phenyl-3-(phenylselanyl)-2H-indazole (3y).** The general procedure **A** was followed using substrate **1y** (0.2 mmol, 55 mg). Isolation by column chromatography (PE/EtOAc: 30/1→15/1) yielded **3y** (76 mg, 88%) as yellow solid. Mp: 122.5–124.9 °C.  $^1H$  NMR (400 MHz,  $CDCl_3$ ):  $\delta$  = 7.89 (s, 1H), 7.71 (d,  $J$  = 9.1 Hz, 1H), 7.52 – 7.43 (m, 6H), 7.19 – 7.08 (m, 5H).  $^{13}C$  NMR (100 MHz,  $CDCl_3$ ):  $\delta$  = 147.7, 140.0, 131.0, 130.8, 130.6, 129.7, 129.4, 129.3, 128.9, 127.5, 126.5, 123.3, 120.2, 119.7, 117.2. HRMS (ESI)  $m/z$  calcd for  $C_{19}H_{14}BrN_2Se$   $[M+H]^+$  428.9500, found 428.9491.

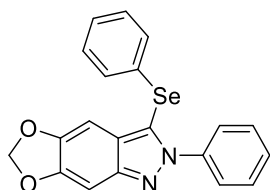

**2-Phenyl-3-(phenylselanyl)-2H-[1,3]dioxolo[4,5-f]indazole (3z).** The general procedure **A** was followed using substrate **1z** (0.2 mmol, 48 mg). Isolation by column chromatography (PE/EtOAc: 30/1→15/1) yielded **3z** (50 mg, 63%) as colorless liquid.  $^1H$  NMR (400 MHz,  $CDCl_3$ ):  $\delta$  = 7.51 – 7.47 (m, 2H), 7.44 – 7.40 (m, 3H), 7.18 – 7.14 (m, 3H), 7.13 – 7.08 (m, 2H), 7.07 (s, 1H), 6.91 (s, 1H), 6.00 (s, 2H).  $^{13}C$  NMR (100 MHz,  $CDCl_3$ ):  $\delta$  = 150.1, 147.0, 146.7, 140.4, 131.6, 130.0, 129.6, 128.8, 128.7, 127.1, 126.3, 124.8, 118.7, 101.3, 95.9, 94.6. HRMS (ESI)  $m/z$  calcd for  $C_{20}H_{15}N_2O_2Se$   $[M+H]^+$  395.0293, found 395.0298.

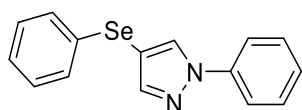

**1-Phenyl-5-(phenylselanyl)-1*H*-pyrazole (3aa).** The general procedure **A** was followed using substrate **1aa** (0.2 mmol, 29 mg). Isolation by column chromatography (PE/EtOAc: 30/1→15/1) yielded **3aa** (37 mg, 62%) as white solid. Mp: 98.6–101.3 °C. <sup>1</sup>H NMR (400 MHz, CDCl<sub>3</sub>): δ = 8.09 (s, 1H), 7.81 (s, 1H), 7.74 – 7.67 (m, 2H), 7.47 (dd, *J* = 7.9 Hz, 2H), 7.36 – 7.29 (m, 3H), 7.25 – 7.14 (m, 3H). <sup>13</sup>C NMR (100 MHz, CDCl<sub>3</sub>): δ = 146.7, 139.7, 132.8, 132.5, 129.6, 129.3, 127.1, 126.5, 119.2, 103.7. HRMS (ESI) *m/z* calcd for C<sub>15</sub>H<sub>13</sub>N<sub>2</sub>Se [M+H]<sup>+</sup> 301.0238, found 301.0235.

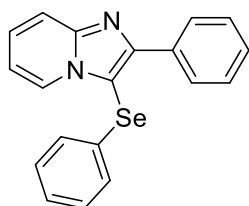

**2-Phenyl-3-(phenylselanyl)imidazo[1,2-*a*]pyridine (3ab).** The general procedure **A** was followed using substrate **1ab** (0.2 mmol, 39 mg). Isolation by column chromatography (PE/EtOAc: 30/1→15/1) yielded **3ab** (56 mg, 80%) as colorless liquid. <sup>1</sup>H NMR (400 MHz, CDCl<sub>3</sub>): δ = 8.35 (d, *J* = 6.8 Hz, 1H), 8.15 (d, *J* = 7.4 Hz, 2H), 7.76 – 7.69 (m, 1H), 7.44 (m, *J* = 7.4 Hz, 2H), 7.38 (m, *J* = 7.3 Hz, 1H), 7.34 – 7.28 (m, 1H), 7.17 (d, *J* = 5.1 Hz, 3H), 7.11 (m, *J* = 7.0, 2.1 Hz, 2H), 6.85 (m, *J* = 6.8 Hz, 1H). <sup>13</sup>C NMR (100 MHz, CDCl<sub>3</sub>): δ = 152.0, 147.9, 133.9, 131.0, 129.8, 128.9, 128.6, 128.4, 128.3, 126.8, 126.6, 125.7, 117.6, 113.1, 102.9. HRMS (ESI) *m/z* calcd for C<sub>19</sub>H<sub>15</sub>N<sub>2</sub>Se [M+H]<sup>+</sup> 351.0395, found 351.0386. Analytical data for compound **3ab** was consistent with the literature.<sup>[4]</sup>

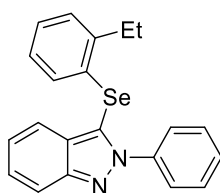

**3-((2-Ethylphenyl)selanyl)-2-phenyl-2*H*-indazole (4a).** The general procedure **B** was followed using substrate **2a** (0.3 mmol, 111 mg). Isolation by column chromatography (PE/EtOAc: 30/1→15/1) yielded **4a** (30 mg, 40%) as colorless liquid. <sup>1</sup>H NMR (400 MHz, CDCl<sub>3</sub>): δ = 7.84 (d, *J* = 8.7 Hz, 1H), 7.67 (d, *J* = 8.5 Hz, 1H), 7.52 – 7.48 (m, 2H), 7.44 – 7.37 (m, 4H), 7.19 (dd, *J* = 8.5, 7.6 Hz, 1H), 7.16 – 7.09 (m, 2H), 6.89 (ddd, *J* = 8.0, 7.4, 1.7 Hz, 1H), 6.78 (d, *J* = 7.8 Hz, 1H), 2.66 (q, *J* = 7.6 Hz, 2H), 1.17 (t, *J* = 7.6 Hz, 3H). <sup>13</sup>C NMR (100 MHz, CDCl<sub>3</sub>): δ = 149.4, 143.3,

140.4, 131.8, 130.6, 129.1, 128.8, 128.8, 128.5, 127.4, 127.3, 127.1, 126.5, 123.5, 121.1, 119.7, 118.5, 28.6, 14.8. HRMS (ESI)  $m/z$  calcd for  $C_{21}H_{19}N_2Se$   $[M+H]^+$  379.0708, found 379.0705.

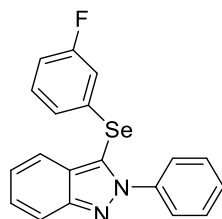

**3-((3-Fluorophenyl)selanyl)-2-phenyl-2H-indazole (4b).** The general procedure **B** was followed using substrate **2b** (0.3 mmol, 104 mg). Isolation by column chromatography (PE/EtOAc: 30/1→15/1) yielded **4b** (68 mg, 93%) as colorless liquid.  $^1H$  NMR (400 MHz,  $CDCl_3$ ):  $\delta$  = 7.85 (d,  $J$  = 8.7 Hz, 1H), 7.70 (d,  $J$  = 8.4 Hz, 1H), 7.54 – 7.45 (m, 5H), 7.41 (dd,  $J$  = 8.4, 7.3 Hz, 1H), 7.23 (dd,  $J$  = 8.7, 7.3 Hz, 1H), 7.14 – 7.07 (m, 1H), 6.89 – 6.82 (m, 2H), 6.81 – 6.77 (m, 1H).  $^{13}C$  NMR (100 MHz,  $CDCl_3$ ):  $\delta$  = 163.0 (d,  $^1J_{C-F}$  = 251.2 Hz), 149.4, 140.2, 133.2 (d,  $^3J_{C-F}$  = 6.9 Hz), 130.8 (d,  $^3J_{C-F}$  = 7.7 Hz), 129.3, 128.9, 128.2, 127.4, 126.6, 125.7 (d,  $^4J_{C-F}$  = 2.8 Hz), 123.9, 120.8, 119.0, 118.6, 117.1 (d,  $^2J_{C-F}$  = 23.3 Hz), 114.3 (d,  $^2J_{C-F}$  = 21.3 Hz).  $^{19}F$  NMR (376 MHz,  $CDCl_3$ ):  $\delta$  = -110.95. HRMS (ESI)  $m/z$  calcd for  $C_{19}H_{14}FN_2Se$   $[M+H]^+$  369.0301, found 369.0294.

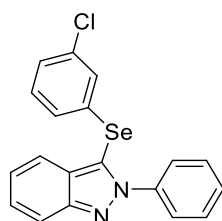

**3-((3-Chlorophenyl)selanyl)-2-phenyl-2H-indazole (4c).** The general procedure **B** was followed using substrate **2c** (0.3 mmol, 114 mg). Isolation by column chromatography (PE/EtOAc: 30/1→15/1) yielded **4c** (48 mg, 62%) as colorless liquid.  $^1H$  NMR (400 MHz,  $CDCl_3$ ):  $\delta$  = 7.85 (d,  $J$  = 8.7 Hz, 1H), 7.70 (d,  $J$  = 8.4 Hz, 1H), 7.53 – 7.45 (m, 5H), 7.41 (dd,  $J$  = 8.4, 7.6 Hz, 1H), 7.23 (dd,  $J$  = 8.7, 7.6 Hz, 1H), 7.16 – 7.11 (m, 1H), 7.09 (s, 1H), 7.07 – 7.01 (m, 1H), 6.97 – 6.90 (m, 1H).  $^{13}C$  NMR (100 MHz,  $CDCl_3$ ):  $\delta$  = 149.4, 140.2, 135.2, 132.9, 130.5, 130.0, 129.3, 128.9, 128.4, 128.2, 127.5, 127.4, 126.6, 123.9, 120.9, 119.1, 118.6. HRMS (ESI)  $m/z$  calcd for  $C_{19}H_{14}ClN_2Se$   $[M+H]^+$  385.0005, found 384.9996.

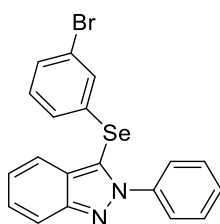

**3-((3-Bromophenyl)selanyl)-2-phenyl-2H-indazole (4d).** The general procedure **B** was followed using substrate **2d** (0.3 mmol, 141 mg). Isolation by column chromatography (PE/EtOAc: 30/1→15/1) yielded **4d** (52 mg, 61%) as colorless liquid.  $^1\text{H}$  NMR (400 MHz,  $\text{CDCl}_3$ ):  $\delta$  = 7.85 (d,  $J$  = 8.7 Hz, 1H), 7.71 (d,  $J$  = 8.4 Hz, 1H), 7.53 – 7.45 (m, 5H), 7.41 (dd,  $J$  = 8.7, 7.7 Hz, 1H), 7.31 – 7.27 (m, 1H), 7.26 – 7.20 (m, 2H), 7.02 – 6.96 (m, 2H).  $^{13}\text{C}$  NMR (100 MHz,  $\text{CDCl}_3$ ):  $\delta$  = 149.4, 140.2, 133.2, 132.8, 130.9, 130.4, 129.3, 128.9, 128.9, 128.1, 127.4, 126.6, 123.9, 123.3, 120.8, 119.1, 118.5. HRMS (ESI)  $m/z$  calcd for  $\text{C}_{19}\text{H}_{14}\text{BrN}_2\text{Se}$   $[\text{M}+\text{H}]^+$  428.9500, found 428.9492.

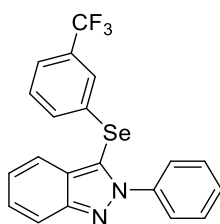

**2-Phenyl-3-((3-(trifluoromethyl)phenyl)selanyl)-2H-indazole (4e).** The general procedure **B** was followed using substrate **2e** (0.3 mmol, 134 mg). Isolation by column chromatography (PE/EtOAc: 30/1→15/1) yielded **4e** (35 mg, 42%) as colorless liquid.  $^1\text{H}$  NMR (400 MHz,  $\text{CDCl}_3$ ):  $\delta$  = 7.85 (d,  $J$  = 8.7 Hz, 1H), 7.71 (d,  $J$  = 8.5 Hz, 1H), 7.50 – 7.44 (m, 5H), 7.44 – 7.34 (m, 3H), 7.26 – 7.17 (m, 3H).  $^{13}\text{C}$  NMR (100 MHz,  $\text{CDCl}_3$ ):  $\delta$  = 149.4, 140.1, 133.8, 132.3, 131.7 (q,  $^2J_{\text{C-F}}$  = 31.6 Hz), 129.9, 129.4, 128.9, 128.1, 127.5, 127.1 (q,  $^3J_{\text{C-F}}$  = 4.1 Hz), 126.6, 124.2 (q,  $^3J_{\text{C-F}}$  = 3.7 Hz), 124.0, 123.5 (q,  $^1J_{\text{C-F}}$  = 272.5 Hz), 120.7, 118.9, 118.6.  $^{19}\text{F}$  NMR (376 MHz,  $\text{CDCl}_3$ ):  $\delta$  = -62.77. HRMS (ESI)  $m/z$  calcd for  $\text{C}_{20}\text{H}_{14}\text{F}_3\text{N}_2\text{Se}$   $[\text{M}+\text{H}]^+$  419.0269, found 419.0266.

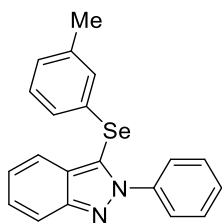

**2-Phenyl-3-(*m*-tolylselanyl)-2*H*-indazole (4f).** The general procedure **B** was followed using substrate **2f** (0.3 mmol, 102 mg). Isolation by column chromatography (PE/EtOAc: 30/1→15/1) yielded **4f** (67 mg, 92%) as yellow oil. <sup>1</sup>H NMR (400 MHz, CDCl<sub>3</sub>): δ = 7.84 (d, *J* = 8.7 Hz, 1H), 7.72 (d, *J* = 8.5 Hz, 1H), 7.56 – 7.51 (m, 2H), 7.49 – 7.44 (m, 3H), 7.40 (dd, *J* = 8.5, 7.2 Hz, 1H), 7.20 (dd, *J* = 8.7, 7.2 Hz, 1H), 7.05 – 7.00 (m, 1H), 6.99 – 6.95 (m, 2H), 6.91 (d, *J* = 7.5 Hz, 1H), 2.21 (s, 3H). <sup>13</sup>C NMR (100 MHz, CDCl<sub>3</sub>): δ = 149.3, 140.4, 139.4, 131.1, 131.0, 129.3, 129.0, 128.8, 128.2, 128.1, 127.6, 127.2, 126.6, 123.4, 121.2, 120.1, 118.3, 21.4. HRMS (ESI) *m/z* calcd for C<sub>20</sub>H<sub>17</sub>N<sub>2</sub>Se [M+H]<sup>+</sup> 365.0551, found 365.0547.

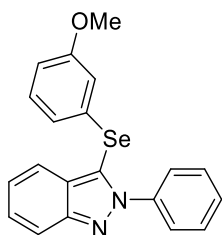

**3-((3-Methoxyphenyl)selanyl)-2-phenyl-2*H*-indazole (4g).** The general procedure **B** was followed using substrate **2g** (0.3 mmol, 112 mg). Isolation by column chromatography (PE/EtOAc: 30/1→15/1) yielded **4g** (43 mg, 56%) as yellow oil. <sup>1</sup>H NMR (400 MHz, CDCl<sub>3</sub>): δ = 7.83 (d, *J* = 8.7 Hz, 1H), 7.72 (d, *J* = 8.5 Hz, 1H), 7.57 – 7.50 (m, 2H), 7.50 – 7.44 (m, 3H), 7.39 (dd, *J* = 8.5, 7.3 Hz, 1H), 7.21 (dd, *J* = 8.7, 7.3 Hz, 1H), 7.06 (dd, *J* = 9.1, 7.9 Hz, 1H), 6.73 – 6.65 (m, 3H), 3.65 (s, 3H). <sup>13</sup>C NMR (100 MHz, CDCl<sub>3</sub>): δ = 160.1, 149.3, 140.3, 132.4, 130.3, 129.1, 128.8, 128.2, 127.3, 126.6, 123.6, 122.5, 121.1, 119.8, 118.4, 115.7, 112.9, 55.3. HRMS (ESI) *m/z* calcd for C<sub>20</sub>H<sub>17</sub>N<sub>2</sub>OSe [M+H]<sup>+</sup> 381.0501, found 381.0496.

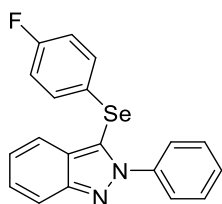

**3-((4-Fluorophenyl)selanyl)-2-phenyl-2H-indazole (4h).** The general procedure **B** was followed using substrate **2h** (0.3 mmol, 104 mg). Isolation by column chromatography (PE/EtOAc: 30/1→15/1) yielded **4h** (45 mg, 61%) as colorless liquid. <sup>1</sup>H NMR (400 MHz, CDCl<sub>3</sub>): δ = 7.82 (d, *J* = 8.7 Hz, 1H), 7.71 (d, *J* = 8.5 Hz, 1H), 7.51 – 7.45 (m, 5H), 7.38 (dd, *J* = 8.5, 7.7 Hz, 1H), 7.21 (dd, *J* = 8.7, 7.7 Hz, 1H), 7.14 – 7.07 (m, 2H), 6.88 – 6.80 (m, 2H). <sup>13</sup>C NMR (100 MHz, CDCl<sub>3</sub>): δ = 162.6 (d, <sup>1</sup>*J*<sub>C-F</sub> = 247.6 Hz), 149.3, 140.3, 133.2 (d, <sup>3</sup>*J*<sub>C-F</sub> = 7.9 Hz), 129.2, 128.9, 127.8, 127.3, 126.7, 125.4 (d, <sup>4</sup>*J*<sub>C-F</sub> = 3.2 Hz), 123.6, 120.9, 120.4, 118.5, 116.7 (d, <sup>2</sup>*J*<sub>C-F</sub> = 21.9 Hz). <sup>19</sup>F NMR (376 MHz, CDCl<sub>3</sub>): δ = -113.88. HRMS (ESI) *m/z* calcd for C<sub>19</sub>H<sub>14</sub>N<sub>2</sub>Se [M+H]<sup>+</sup> 369.0301, found 369.0301.

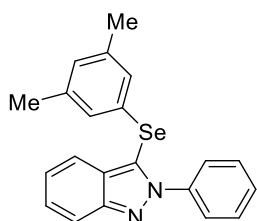

**3-((3,5-Dimethylphenyl)selanyl)-2-phenyl-2H-indazole (4i).** The general procedure **B** was followed using substrate **2i** (0.3 mmol, 111 mg). Isolation by column chromatography (PE/EtOAc: 30/1→15/1) yielded **4i** (19 mg, 25%) as colorless liquid. <sup>1</sup>H NMR (400 MHz, CDCl<sub>3</sub>): δ = 7.84 (d, *J* = 8.7 Hz, 1H), 7.73 (d, *J* = 8.5 Hz, 1H), 7.56 – 7.51 (m, 2H), 7.50 – 7.45 (m, 3H), 7.43 – 7.37 (m, 1H), 7.21 (t, *J* = 7.5 Hz, 1H), 6.80 (s, 1H), 6.75 (s, 2H), 2.16 (s, 6H). <sup>13</sup>C NMR (100 MHz, CDCl<sub>3</sub>): δ = 149.3, 140.4, 139.2, 130.6, 129.2, 129.0, 128.7, 128.3, 128.1, 127.2, 126.7, 123.3, 121.3, 120.3, 118.3, 21.3. HRMS (ESI) *m/z* calcd for C<sub>21</sub>H<sub>19</sub>N<sub>2</sub>Se [M+H]<sup>+</sup> 379.0708, found 379.0704.

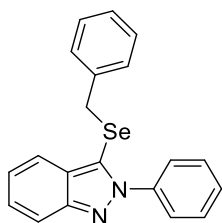

**3-(Benzylselanyl)-2-phenyl-2H-indazole (4j).** The general procedure **B** was followed using substrate **2j** (0.3 mmol, 102 mg). Isolation by column chromatography (PE/EtOAc: 30/1→15/1) yielded **4j** (51 mg, 70%) as colorless liquid. <sup>1</sup>H NMR (400 MHz, CDCl<sub>3</sub>): δ = 7.78 (d, *J* = 8.7 Hz, 1H), 7.63 (d, *J* = 8.4 Hz, 1H), 7.48 – 7.40 (m,

3H), 7.40 – 7.31 (m, 3H), 7.20 – 7.14 (m, 1H), 7.13 – 7.05 (m, 3H), 6.80 (d,  $J = 7.0$  Hz, 2H), 3.86 (s, 2H).  $^{13}\text{C}$  NMR (100 MHz,  $\text{CDCl}_3$ )  $\delta = 149.2, 140.3, 137.7, 128.9, 128.7, 128.7, 128.6, 128.1, 127.3, 127.1, 126.8, 123.0, 121.0, 120.4, 118.3, 33.8$ . HRMS (ESI)  $m/z$  calcd for  $\text{C}_{20}\text{H}_{17}\text{N}_2\text{Se}$   $[\text{M}+\text{H}]^+$  365.0551, found 365.0554.

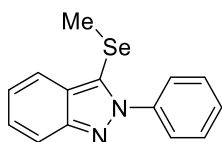

**3-(Methylselanyl)-2-phenyl-2H-indazole (4k).** The general procedure **B** was followed using substrate **2k** (0.3 mmol, 56 mg). Isolation by column chromatography (PE/EtOAc: 30/1→15/1) yielded **4k** (39 mg, 68%) as colorless liquid.  $^1\text{H}$  NMR (400 MHz,  $\text{CDCl}_3$ ):  $\delta = 7.78$  (dd,  $J = 9.3, 8.9$  Hz, 2H), 7.70 – 7.63 (m, 2H), 7.60 – 7.49 (m, 3H), 7.37 (dd,  $J = 8.6, 7.3$  Hz, 1H), 7.20 (dd,  $J = 8.8, 7.3$  Hz, 1H), 2.13 (s, 3H).  $^{13}\text{C}$  NMR (100 MHz,  $\text{CDCl}_3$ ):  $\delta = 149.3, 140.6, 129.1, 129.0, 127.2, 127.2, 126.6, 122.8, 121.2, 121.1, 118.3, 10.2$ . HRMS (ESI)  $m/z$  calcd for  $\text{C}_{14}\text{H}_{13}\text{N}_2\text{Se}$   $[\text{M}+\text{H}]^+$  289.0238, found 289.0239.

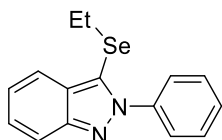

**3-(Ethylselanyl)-2-phenyl-2H-indazole (4l).** The general procedure **B** was followed using substrate **2l** (0.3 mmol, 65 mg). Isolation by column chromatography (PE/EtOAc: 30/1→15/1) yielded **4l** (25 mg, 41%) as yellow oil.  $^1\text{H}$  NMR (400 MHz,  $\text{CDCl}_3$ ):  $\delta = 7.83 - 7.73$  (m, 2H), 7.68 – 7.62 (m, 2H), 7.57 – 7.47 (m, 3H), 7.38 (dd,  $J = 8.8, 7.4$  Hz, 1H), 7.20 (dd,  $J = 8.4, 7.4$  Hz, 1H), 2.66 (q,  $J = 7.5$  Hz, 2H), 1.18 (t,  $J = 7.5$  Hz, 3H).  $^{13}\text{C}$  NMR (100 MHz,  $\text{CDCl}_3$ ):  $\delta = 148.9, 140.3, 128.7, 128.5, 127.8, 126.8, 126.5, 122.6, 121.0, 120.1, 117.9, 23.8, 15.6$ . HRMS (ESI)  $m/z$  calcd for  $\text{C}_{15}\text{H}_{15}\text{N}_2\text{Se}$   $[\text{M}+\text{H}]^+$  303.0395, found 303.0396.

## Radical Scavenger Experiments

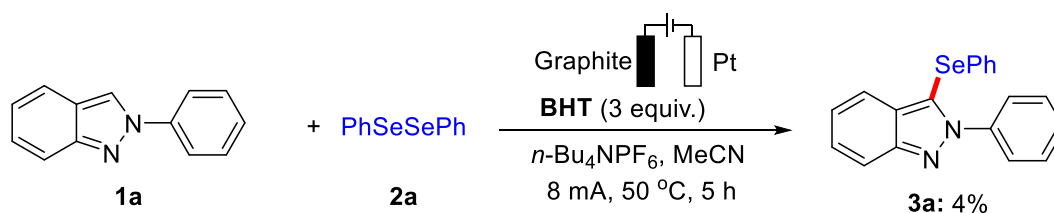

In an undivided cell (20 mL) equipped with a stirring bar, a mixture of **1a** (0.2 mmol), **2a** (0.3 mmol), BHT (3 equiv.), *n*-Bu<sub>4</sub>NPF<sub>6</sub> (0.5 mmol) and MeCN (5 mL) were added. The cell was equipped with graphite plate (1.5 cm × 1 cm × 0.2 cm) as the anode and platinum plate (1 cm × 1 cm × 0.01 cm) as the cathode and connected to a DC regulated power supply. The reaction mixture was stirred and electrolyzed at a constant current of 8 mA at 50 °C (heating module) for 5 h. When the reaction was finished, the mixture was concentrated under reduced pressure. Purification by column chromatography on silica gel (eluent: petroleum ether/ethyl acetate: 15/1) yielded product **3a** (3 mg, 4%) as white solid.

## Intermolecular Competition Experiments

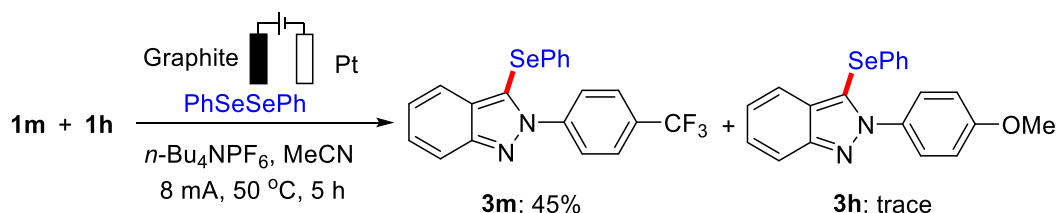

In an undivided cell (20 mL) equipped with a stirring bar, a mixture of **1m** (0.2 mmol), **1h** (0.2 mmol), **2a** (0.2 mmol),  $n\text{-Bu}_4\text{NPF}_6$  (0.5 mmol) and MeCN (5 mL) were added. The cell was equipped with graphite plate (1.5 cm  $\times$  1 cm  $\times$  0.2 cm) as the anode and platinum plate (1 cm  $\times$  1 cm  $\times$  0.01 cm) as the cathode and connected to a DC regulated power supply. The reaction mixture was stirred and electrolyzed at a constant current of 8 mA at 50 °C by heating the aluminum block for 5 h. When the reaction was finished, the mixture was concentrated under reduced pressure. Purification by column chromatography on silica gel (eluent: petroleum ether/ethyl acetate: 15/1) yielded solo product **3m** (38 mg, 45%) as white solid.

## Gram-scale Synthesis

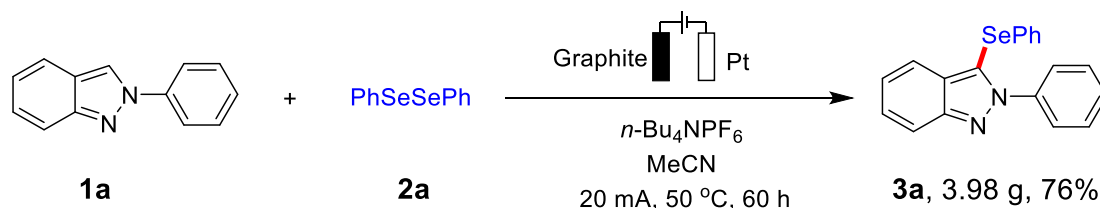

In an undivided cell (250 mL) equipped with a stir bar, a mixture of substrates **1a** (15.0 mmol, 2.91 g), **2a** (22.5 mmol, 7.02 g),  $n\text{-Bu}_4\text{NPF}_6$  (15.0 mmol, 5.81 g) and MeCN (150 mL) were added. The cell was equipped with a graphite plate (3 cm  $\times$  3 cm  $\times$  0.6 cm) as the anode and platinum plate (3 cm  $\times$  3 cm  $\times$  0.01 cm) as the cathode and connected to a DC regulated power supply. The reaction mixture was stirred and electrolyzed at a constant current of 20 mA at 50 °C in an oil bath for 60 h. When the reaction was finished, the mixture was concentrated under reduced pressure. Purification by column chromatography on silica gel (eluent: petroleum ether/ethyl acetate: 15/1) yielded solo product **3a** (3.98 g, 76%) as white solid.

## Control Experiments

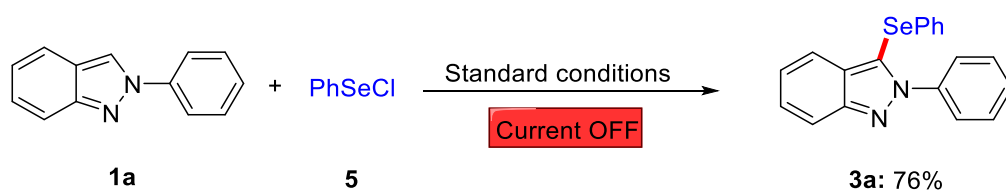

In an undivided cell (20 mL) equipped with a stirring bar, a mixture of **1a** (0.2 mmol), **2a** (0.3 mmol), **5** (0.3 mmol), *n*-Bu<sub>4</sub>NPF<sub>6</sub> (0.5 mmol) and MeCN (5 mL) were added. The cell was equipped with graphite plate (1.5 cm × 1 cm × 0.2 cm) as the anode and platinum plate (1 cm × 1 cm × 0.01 cm) as the cathode and connected to a DC regulated power supply. The reaction mixture was stirred and electrolyzed at a constant current of 8 mA at 50 °C by heating the aluminum block for 5 h. When the reaction was finished, the mixture was concentrated under reduced pressure. Purification by column chromatography on silica gel (eluent: petroleum ether/ethyl acetate: 15/1) yielded product **3a** (58 mg, 82%) as white solid. In addition, when performing the reaction without current, the product **3a** (53 mg, 76%) was also isolated as white solid.

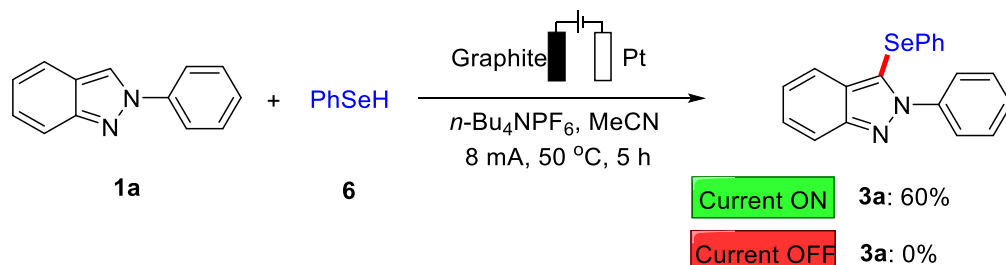

In an undivided cell (20 mL) equipped with a stirring bar, a mixture of **1a** (0.2 mmol), **2a** (0.3 mmol), **6** (0.3 mmol), *n*-Bu<sub>4</sub>NPF<sub>6</sub> (0.5 mmol) and MeCN (5 mL) were added. The cell was equipped with graphite plate (1.5 cm × 1 cm × 0.2 cm) as the anode and platinum plate (1 cm × 1 cm × 0.01 cm) as the cathode and connected to a DC regulated power supply. The reaction mixture was stirred and electrolyzed at a constant current of 8 mA at 50 °C by heating the aluminum block for 5 h. When the reaction was finished, the mixture was concentrated under reduced pressure. Purification by column chromatography on silica gel (eluent: petroleum ether/ethyl acetate: 15/1) yielded product **3a** (42 mg, 60%) as white solid. In addition, when performing the reaction without current, no product of **3a** was formed.

### Cyclic Voltammetry Experiments

Cyclic voltammetry experiments were carried out on an IGS 1230 electrochemical work station (Ingsens instruments, Guangzhou) 0.1 M  $n\text{-Bu}_4\text{NPF}_6$  was dissolved in acetonitrile. Working electrode: glassy carbon, counter electrode: Pt, reference electrode: Ag-AgCl (3 M KCl). Scan rate: 100 mV/s.

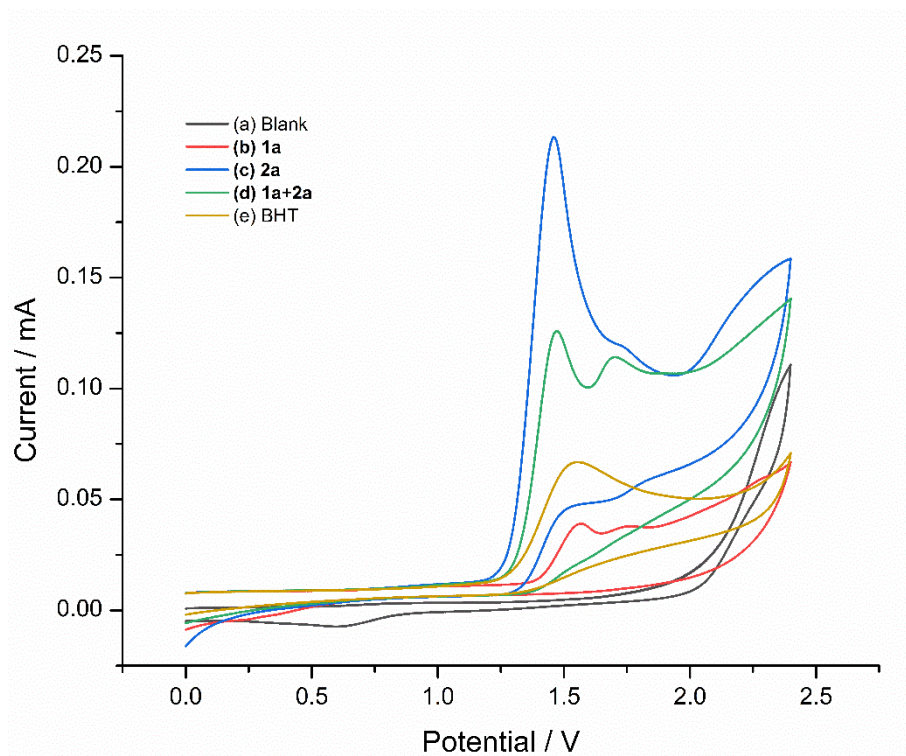

**Figure S1.** Cyclic voltammograms. Conditions: a glassy carbon working electrode, a Ag/AgCl (3 M KCl) reference electrode, and a platinum wire counter electrode,  $n\text{-Bu}_4\text{NPF}_6$  (0.1 M in MeCN), 100mV/s scan rate. (a) Background; (b) **1a** (1 mM); (c) **2a** (1 mM); (d) **1a** (1 mM) + **2a** (1 mM)

## References

- [1] A. Dey, A. Hajra, *J. Org. Chem.* **2019**, *84*, 14904–14910.
- [2] F. Li, D. Wang, H. Chen, Z. He, L. Zhou, Q. Zeng, *Chem. Commun.* **2020**, *56*, 13029–13032.
- [3] K. C. C. Aganda, J. Kim, A. Lee, *Org. Biomol. Chem.* **2019**, *17*, 9698–9702.
- [4] Y. J. Kim and D. Y. Kim, *Tetrahedron Lett.*, **2019**, *60*, 739-742.

# <sup>1</sup>H-, <sup>13</sup>C- and <sup>19</sup>F-NMR Spectra

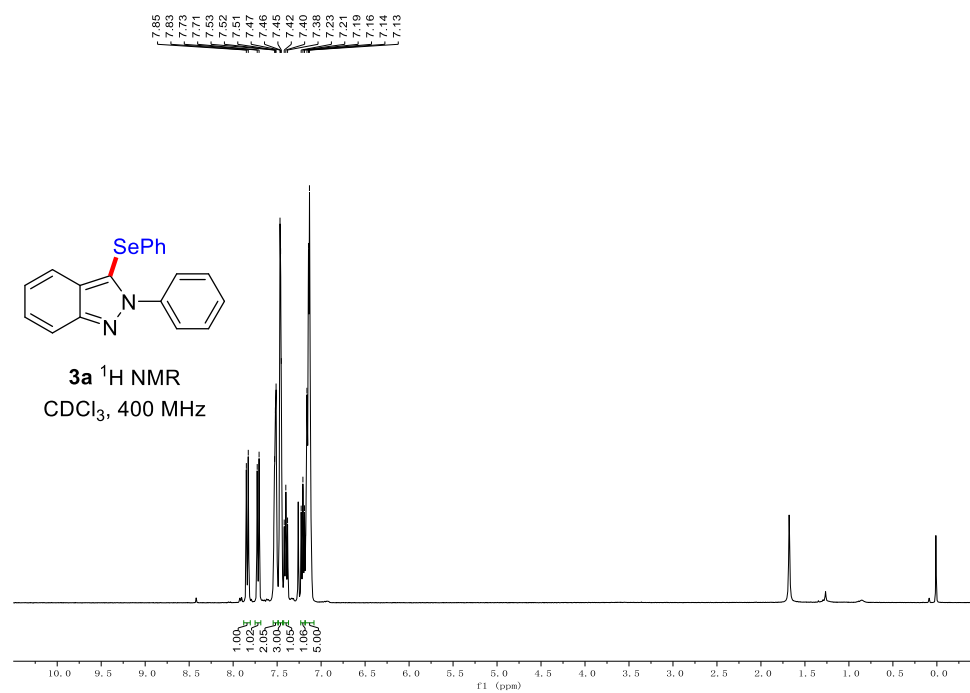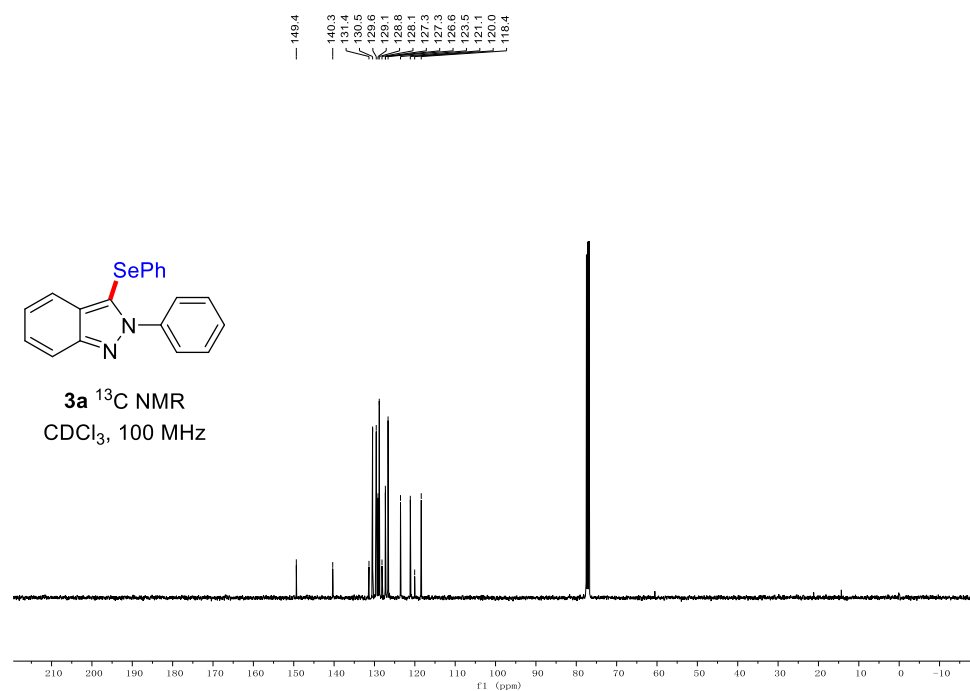

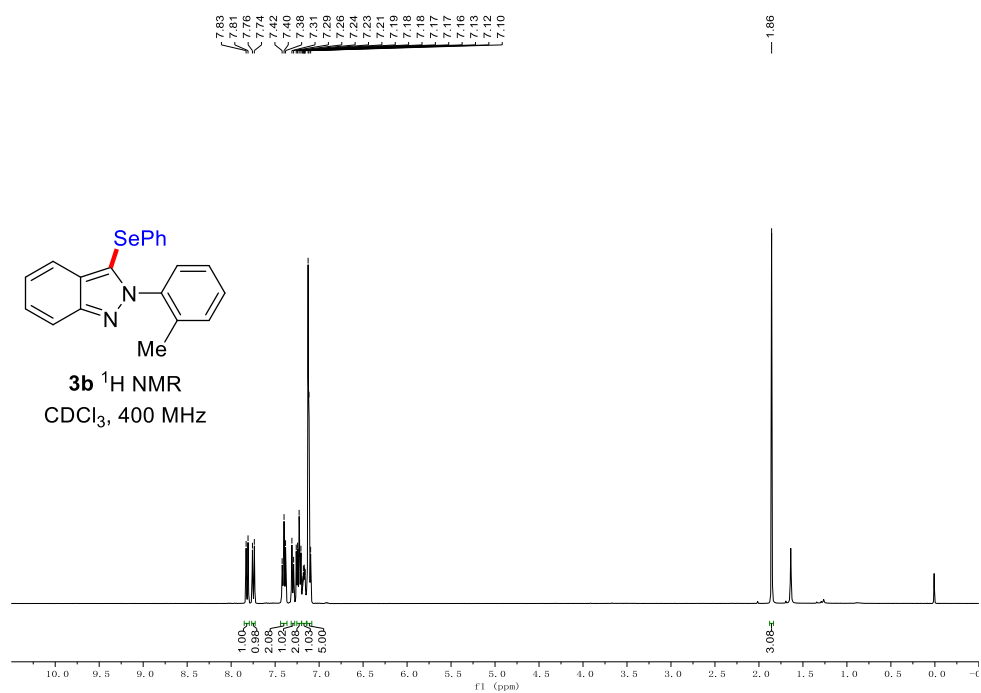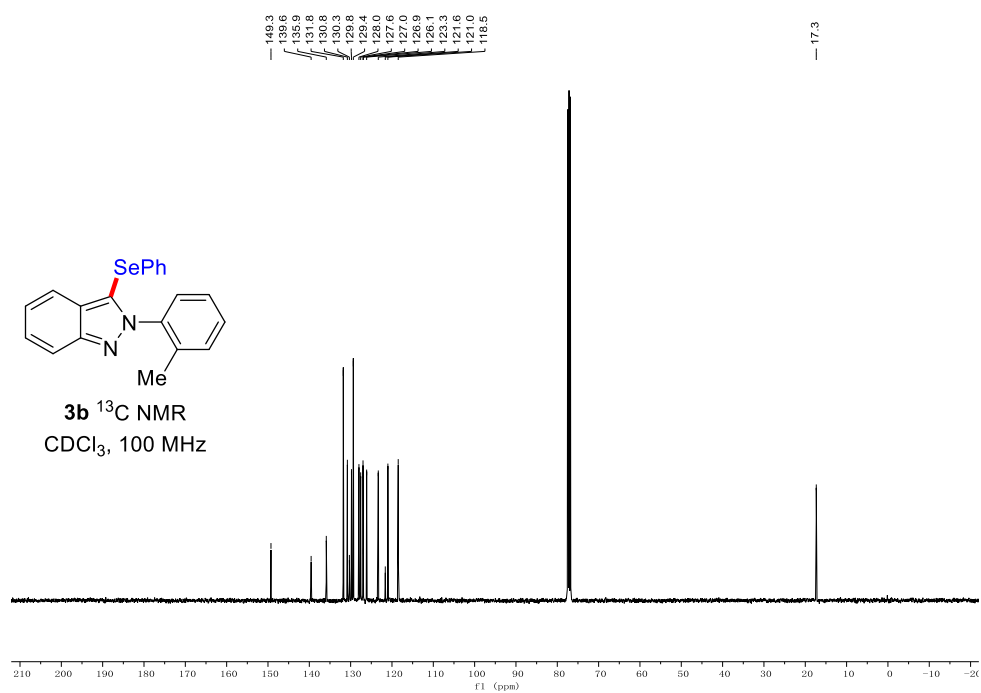

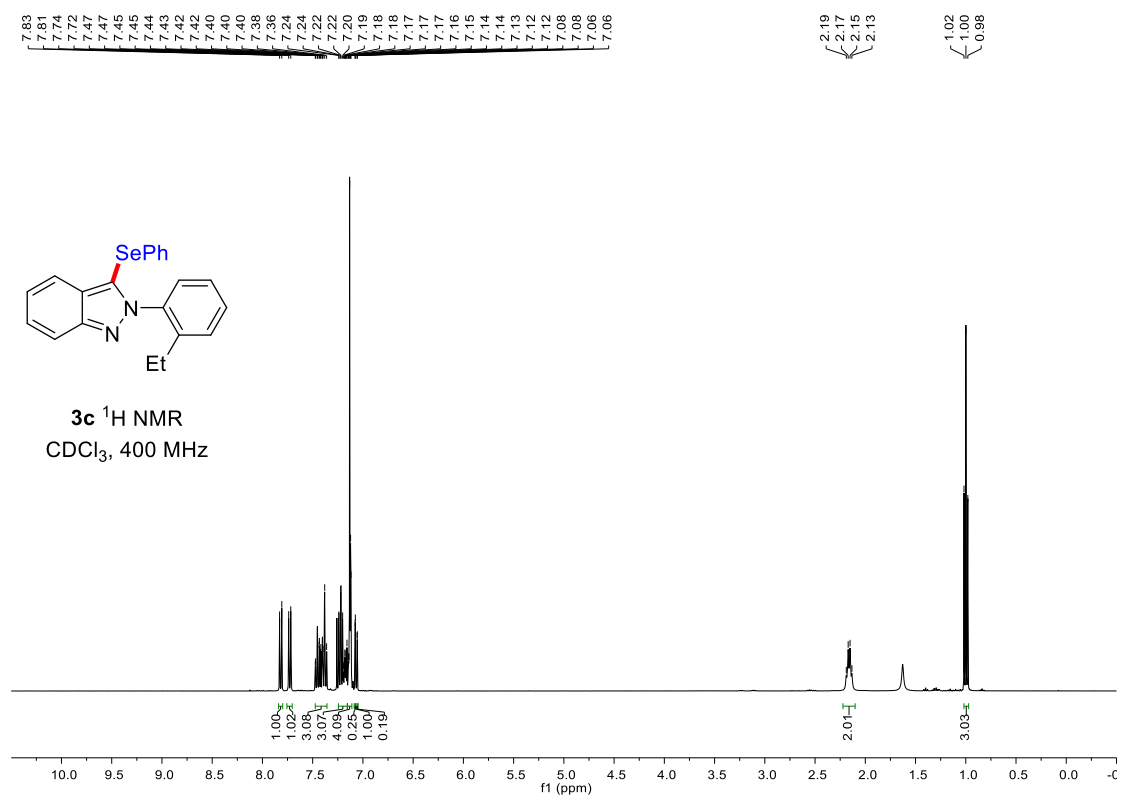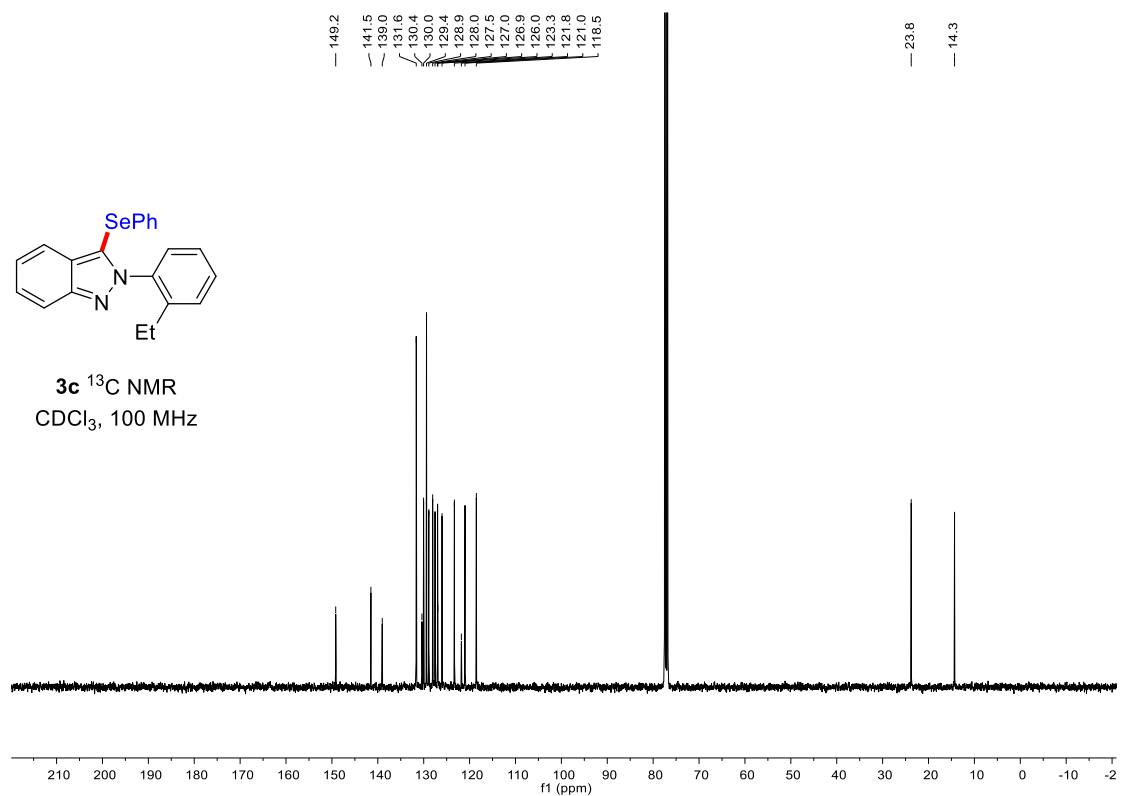

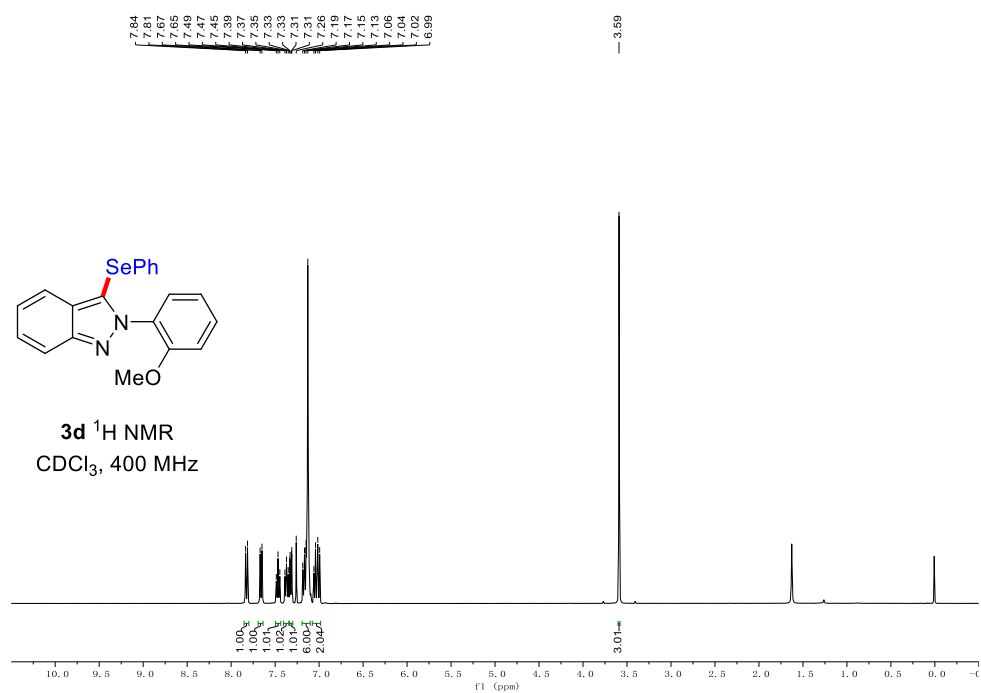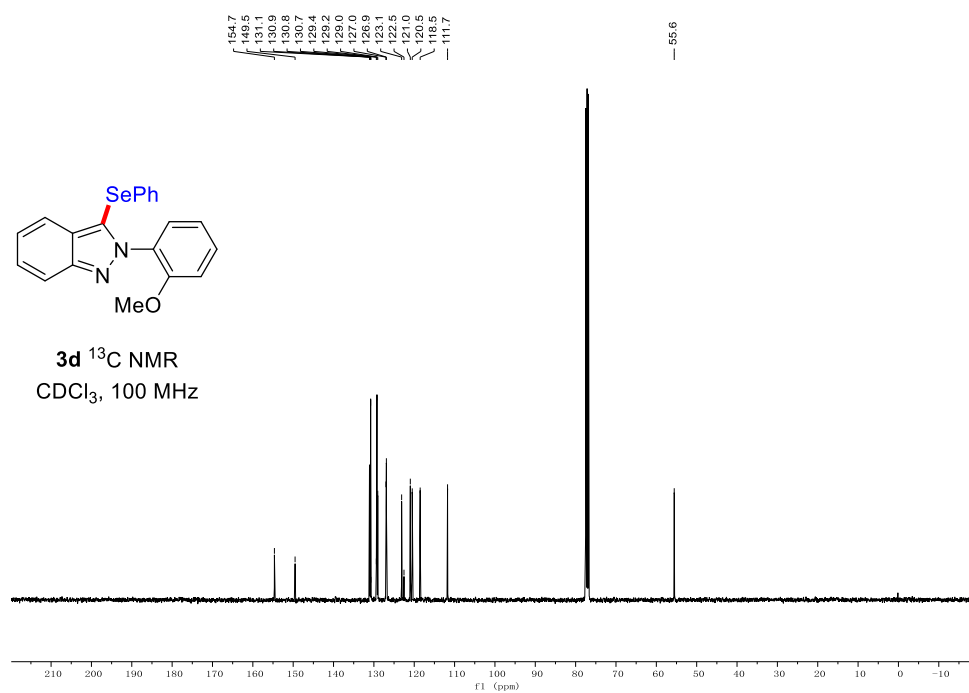

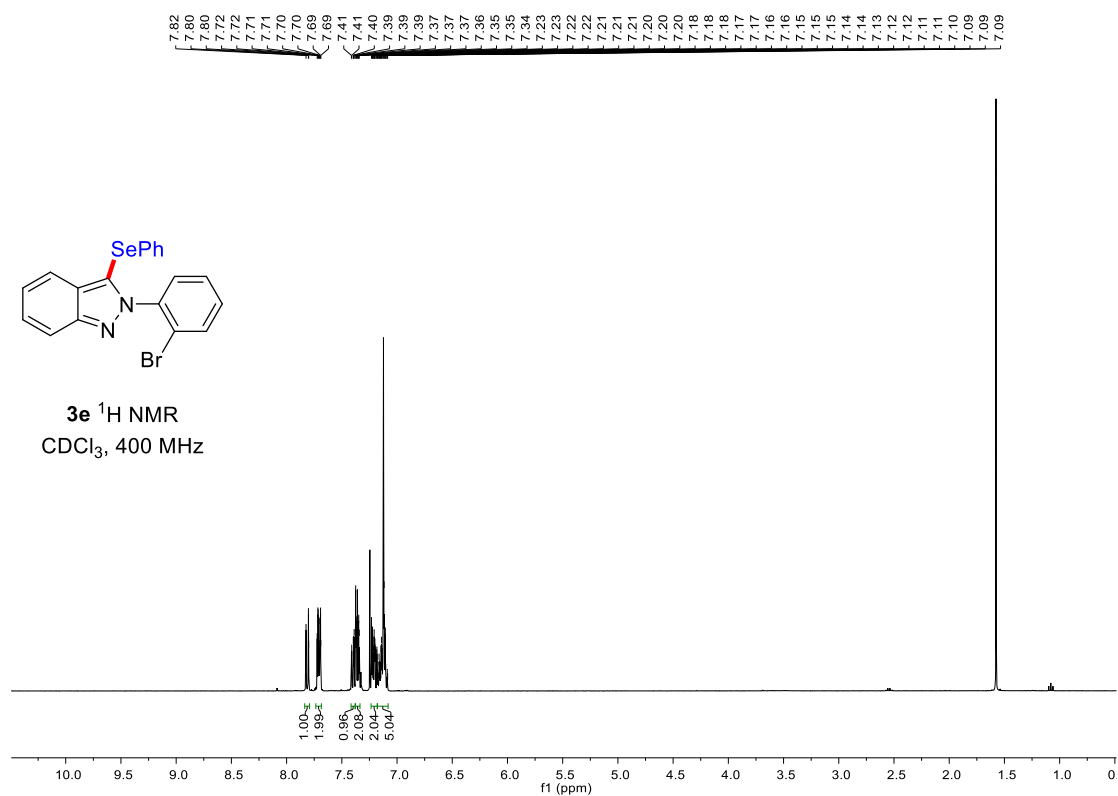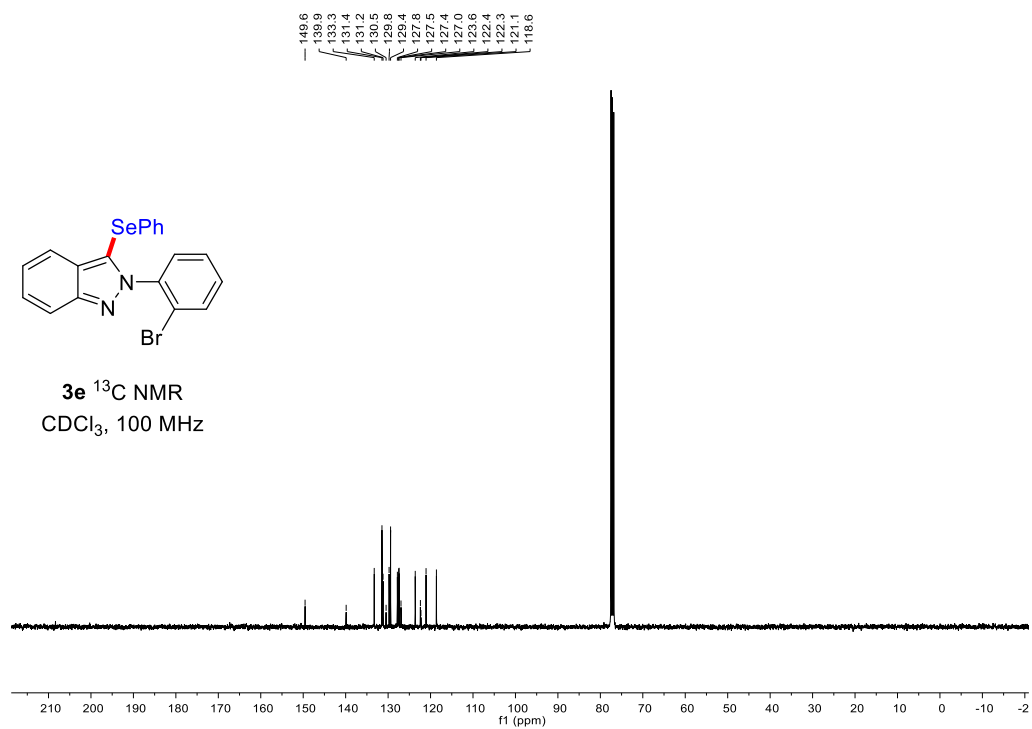

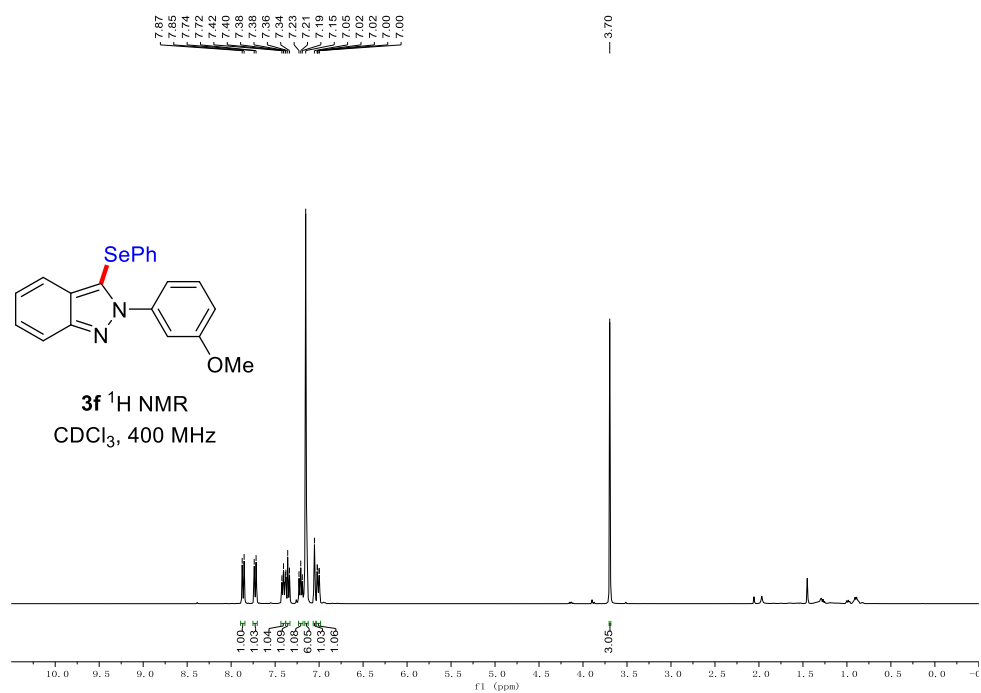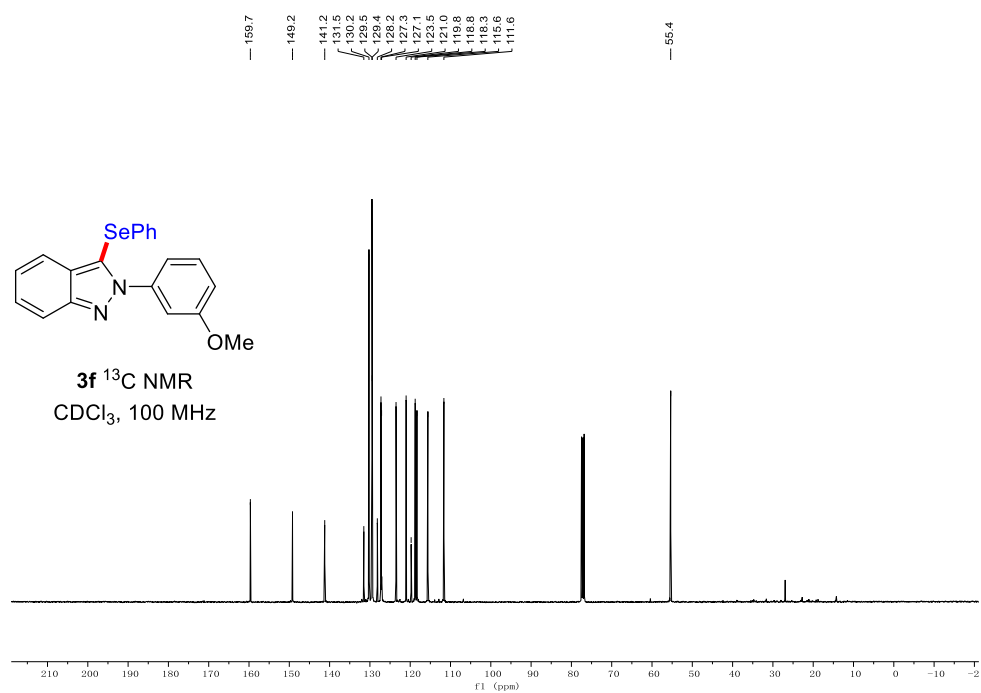

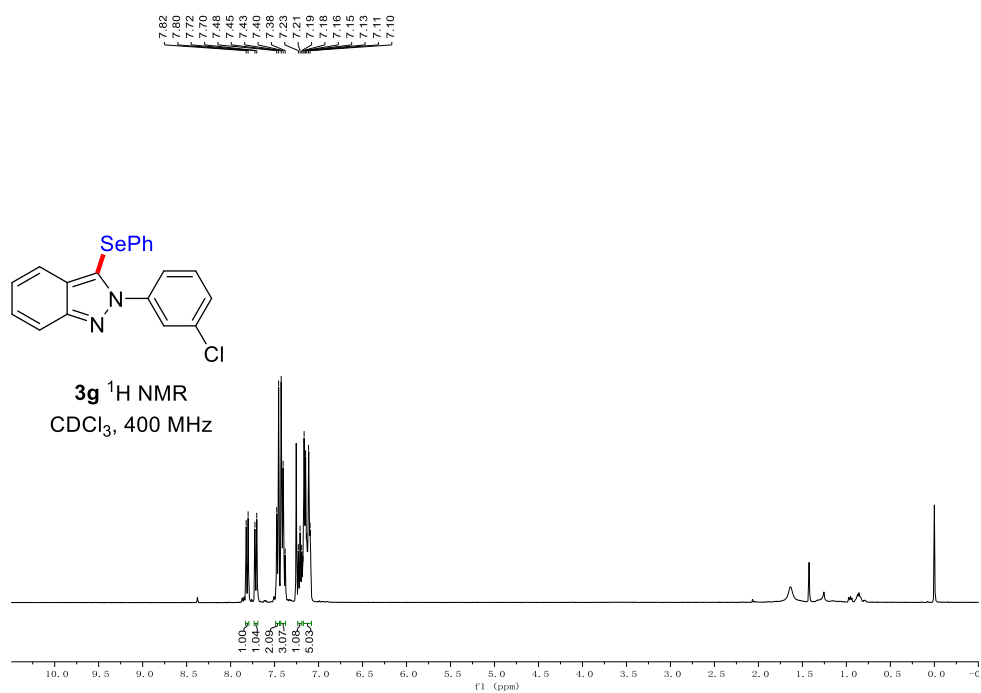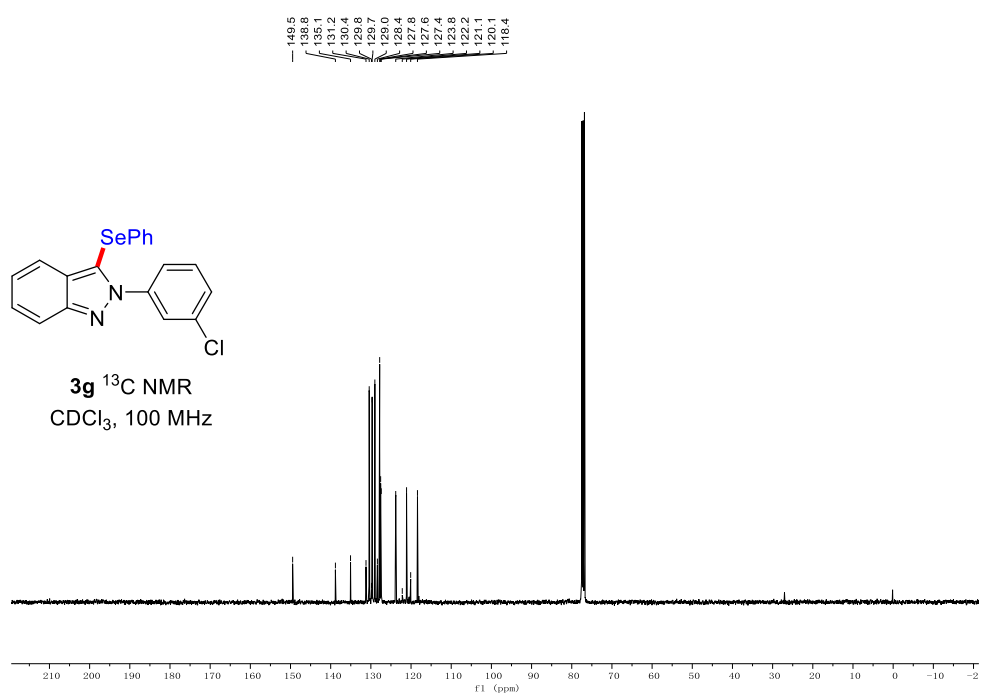

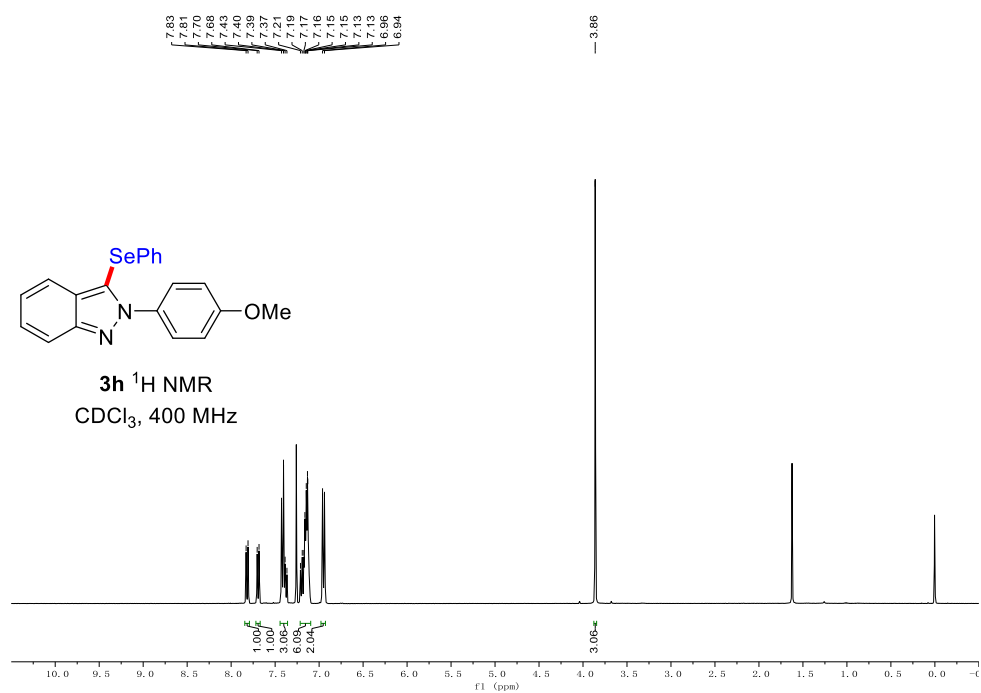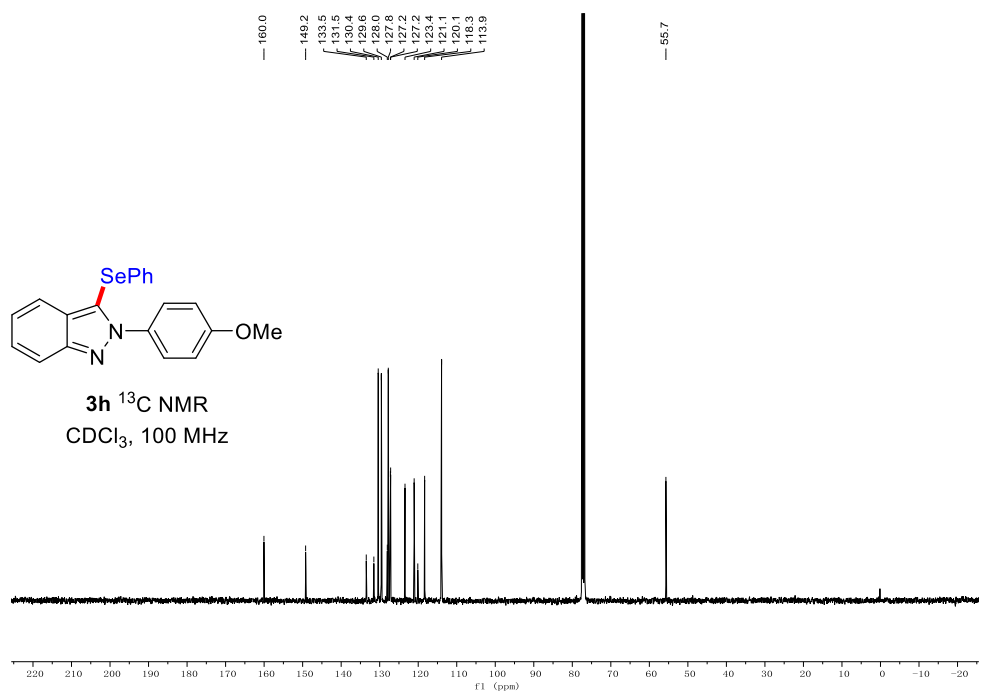

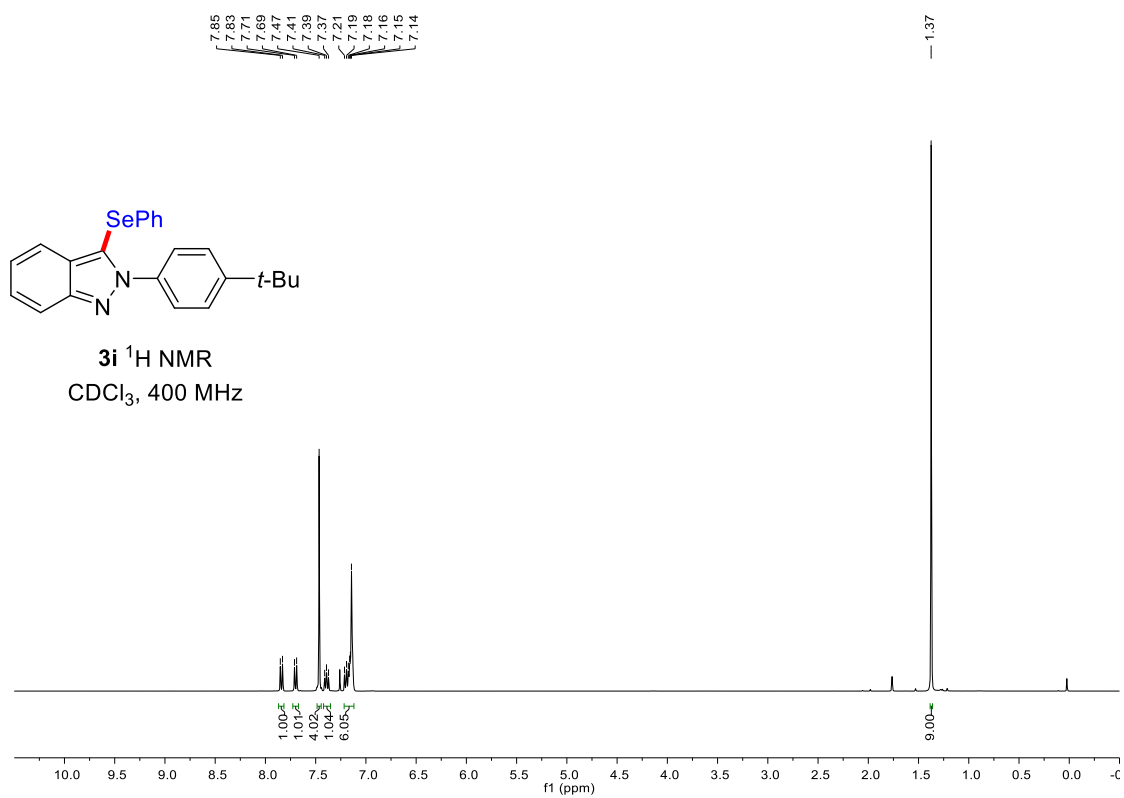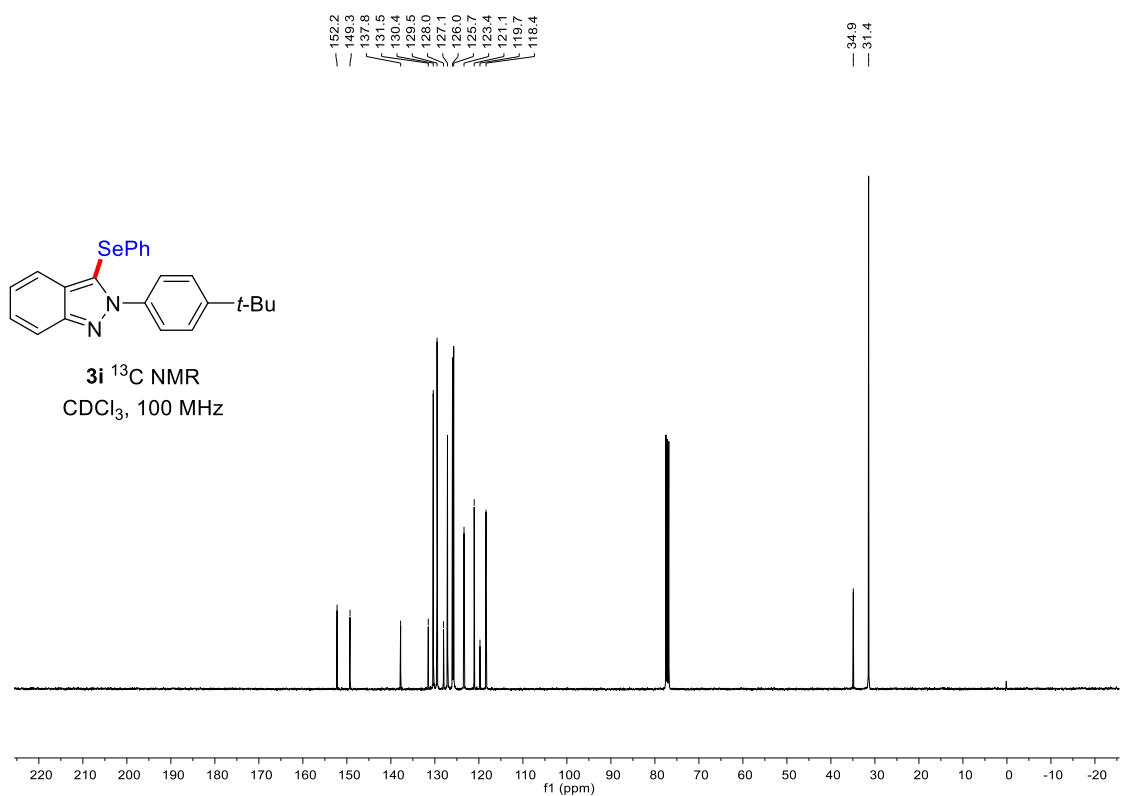

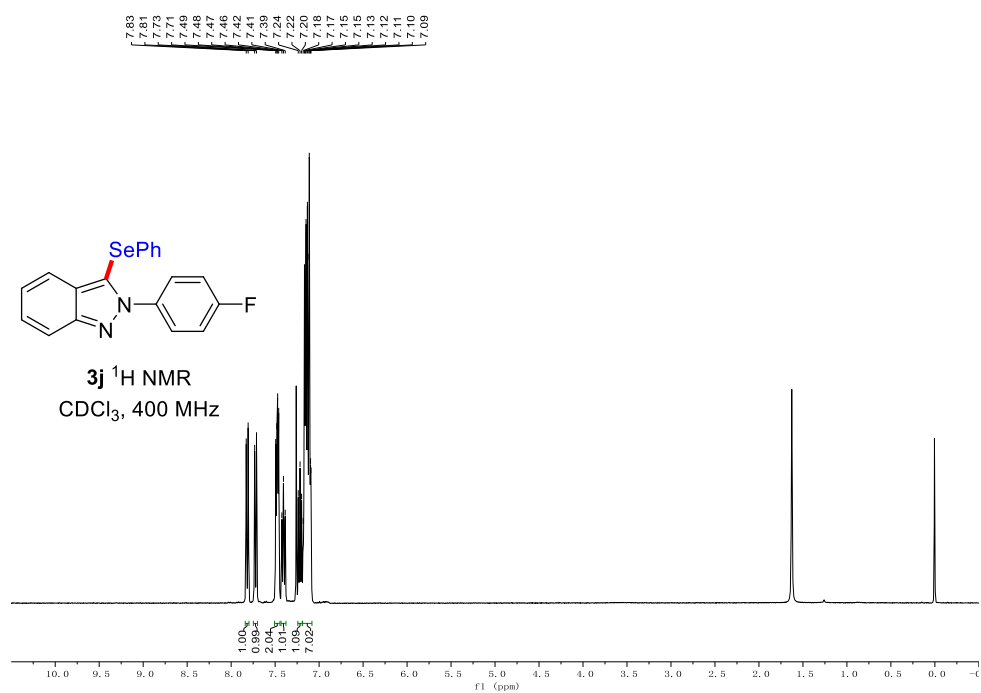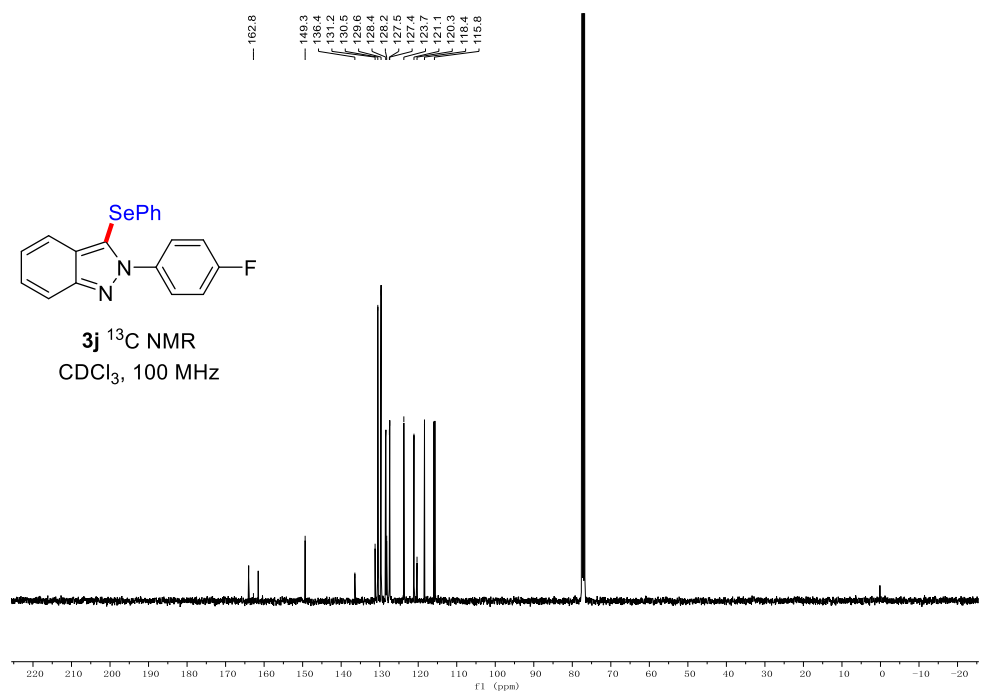

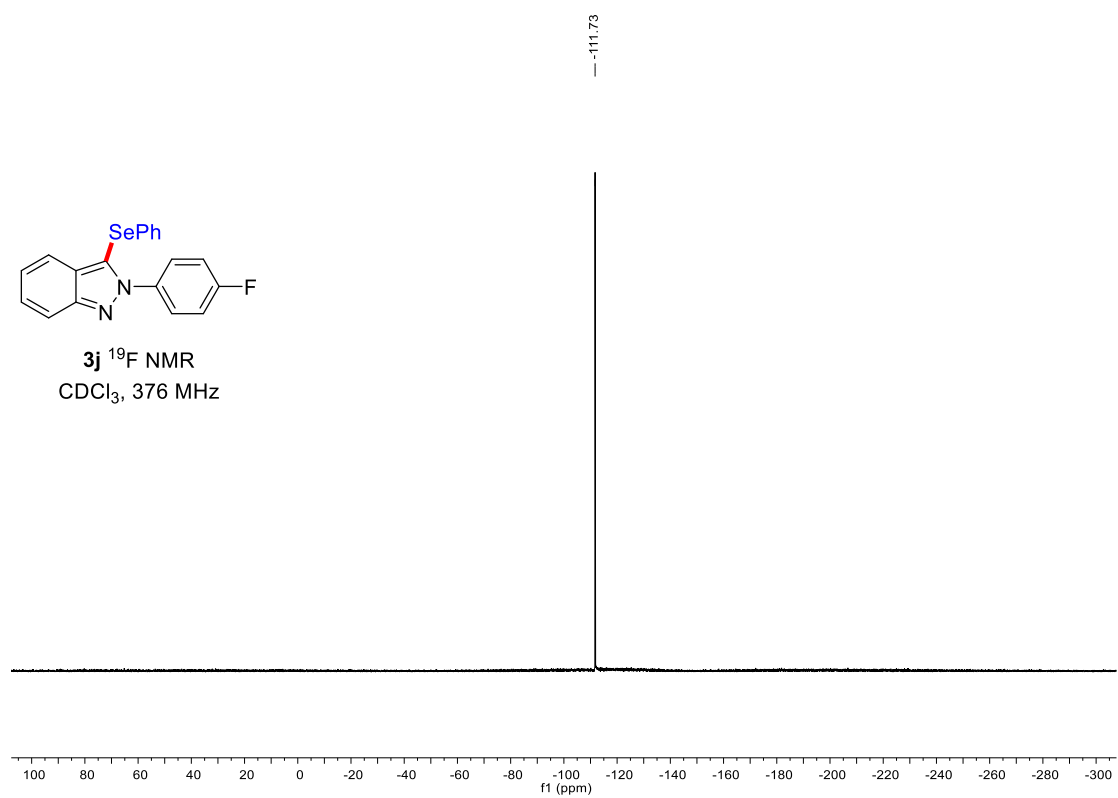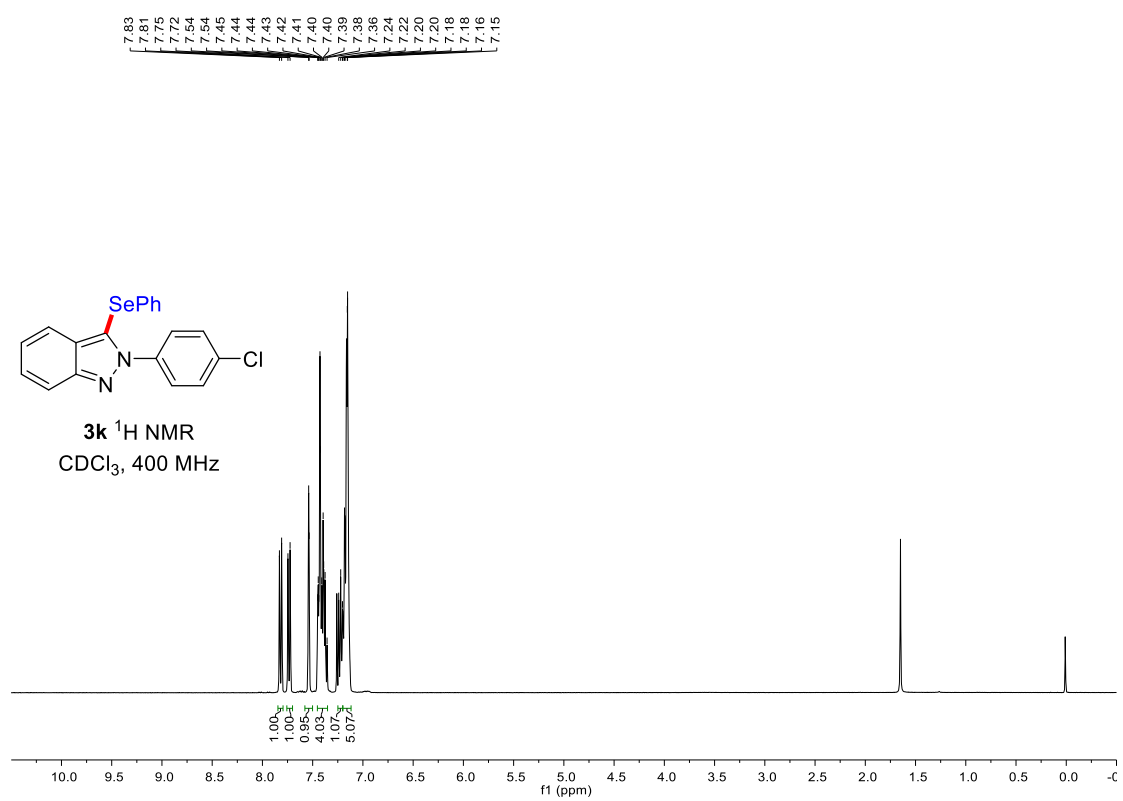

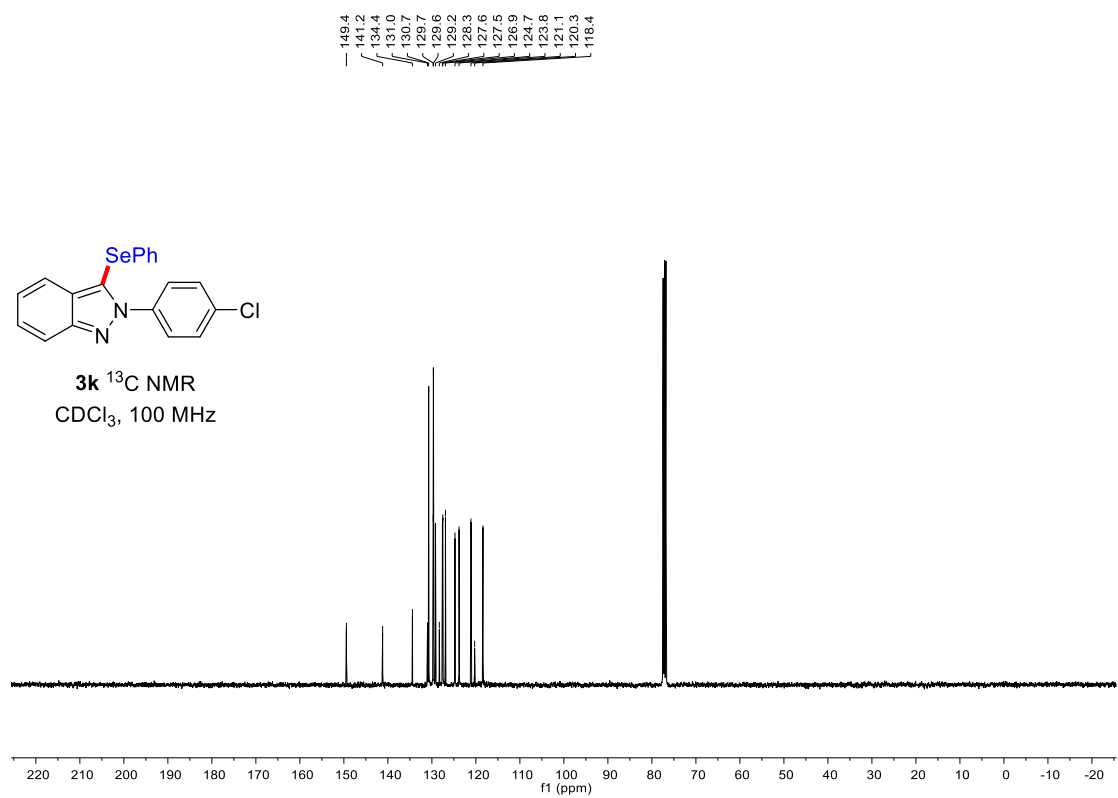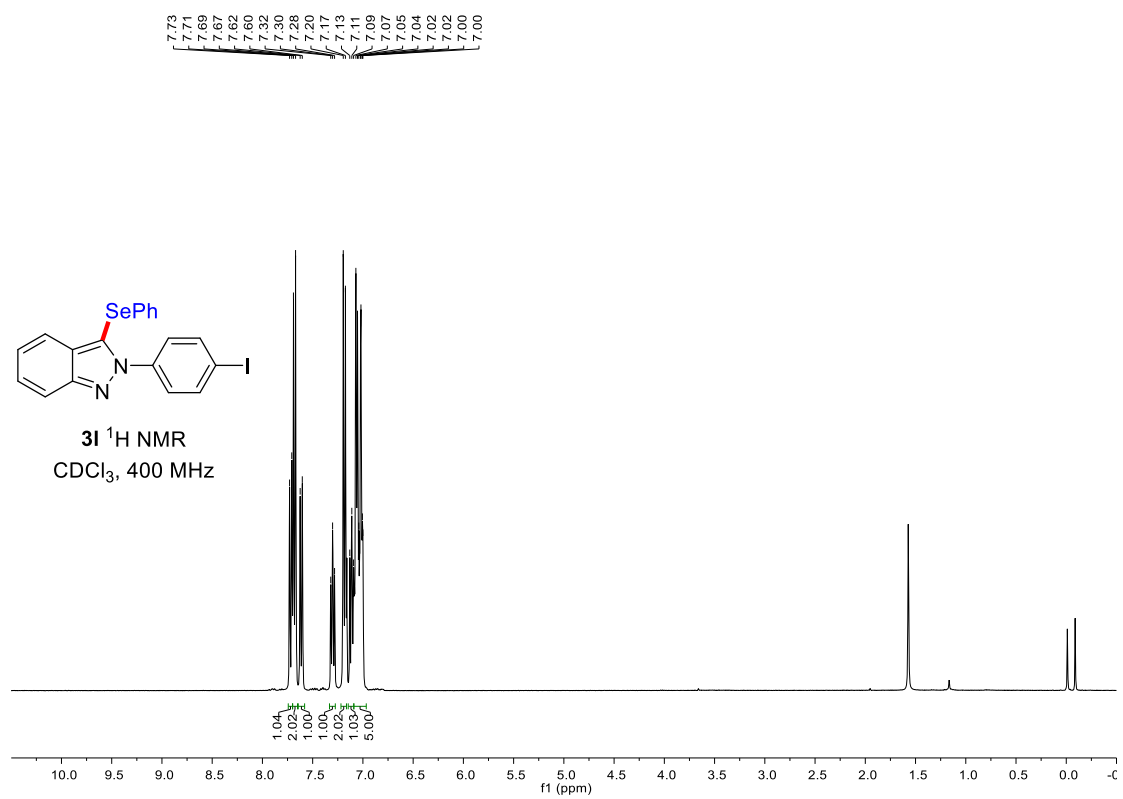

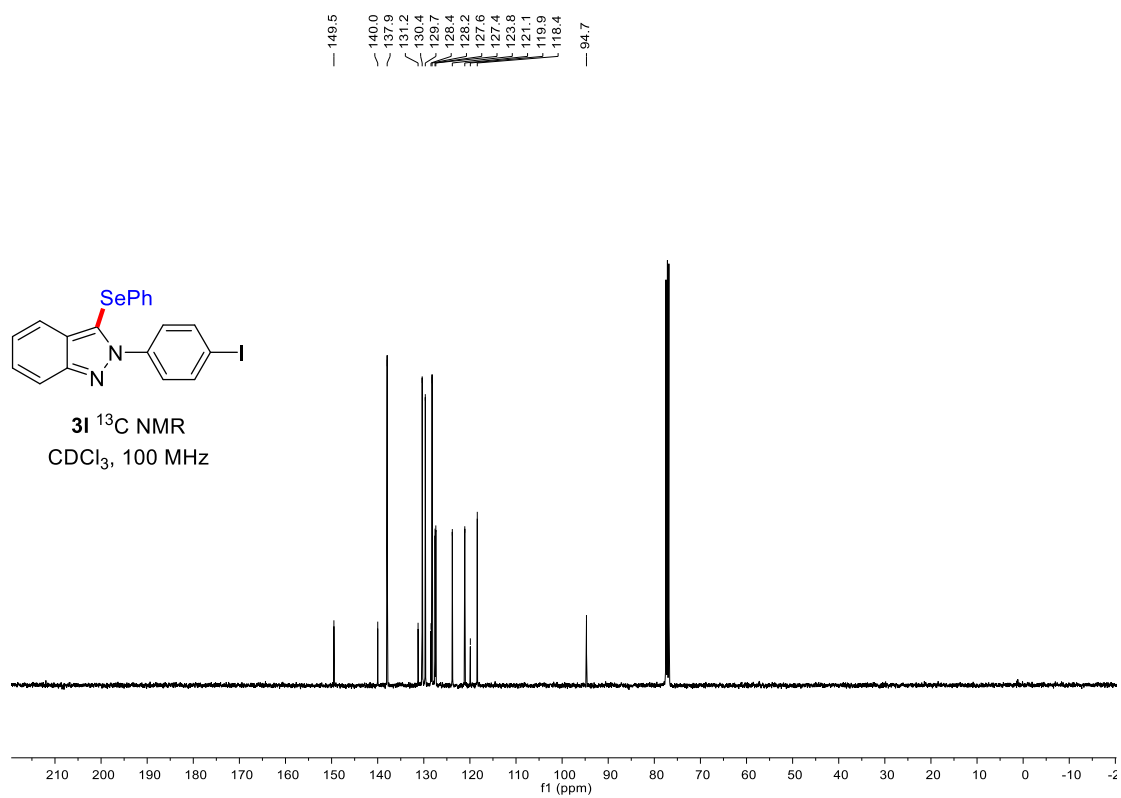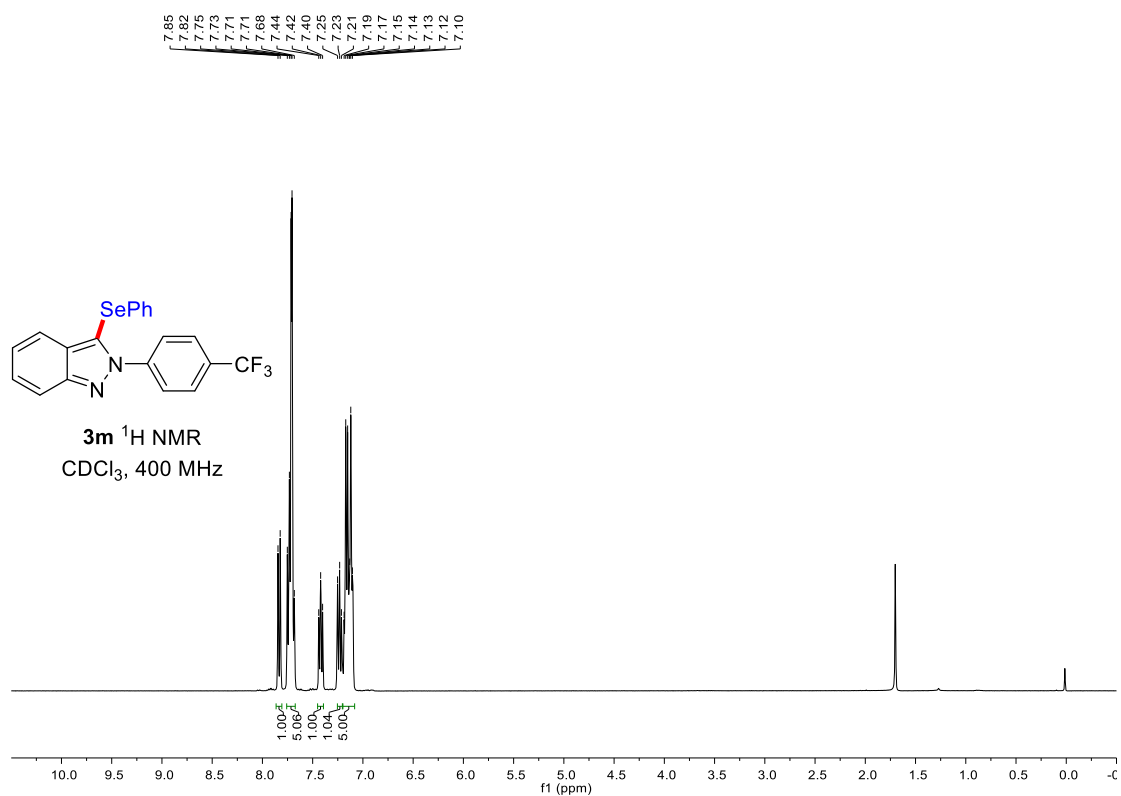

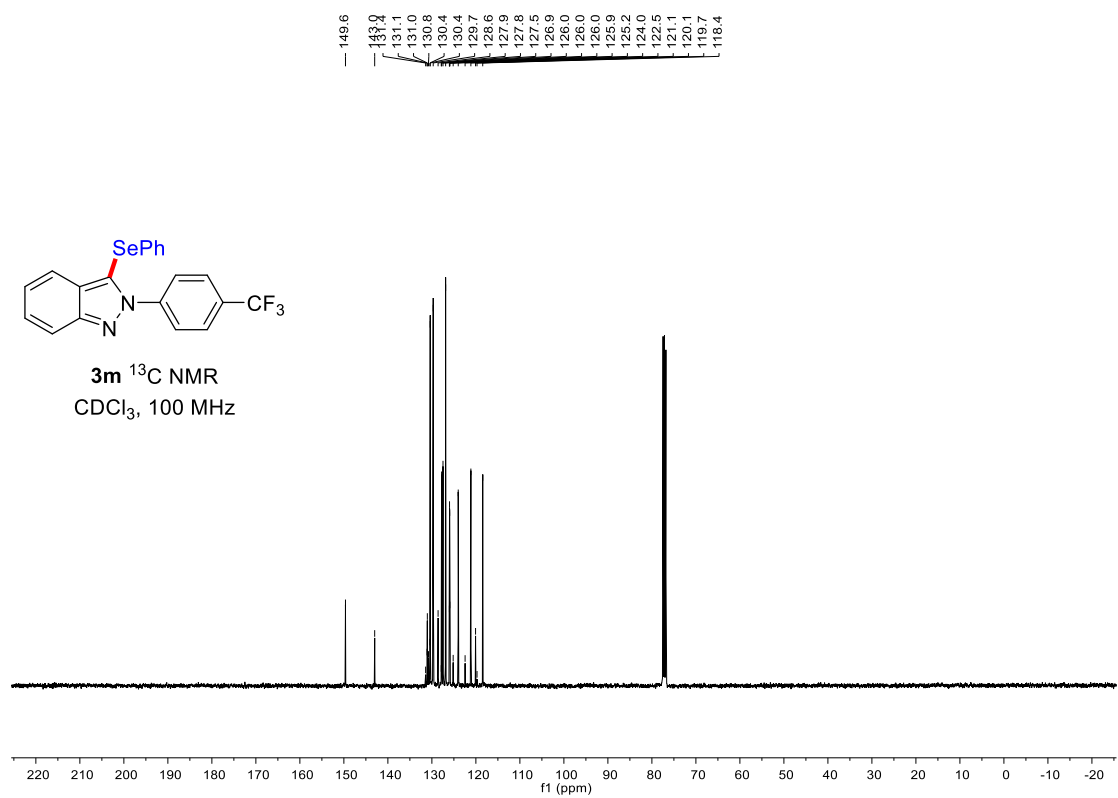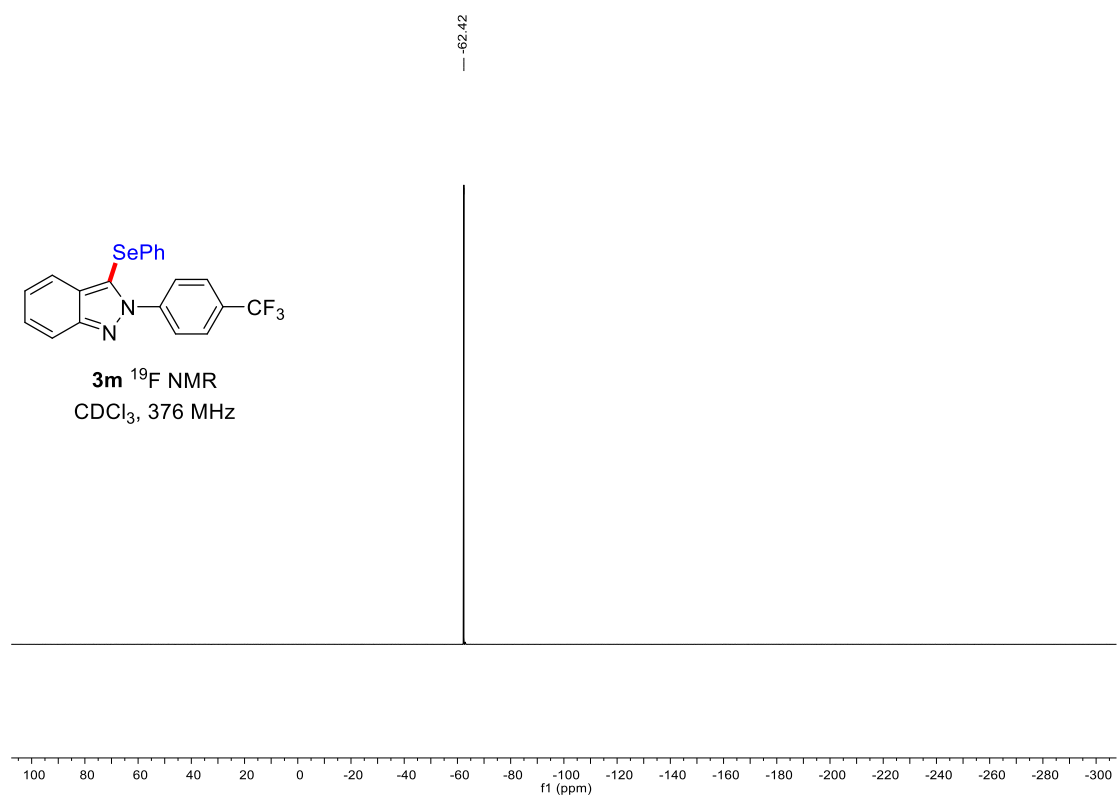

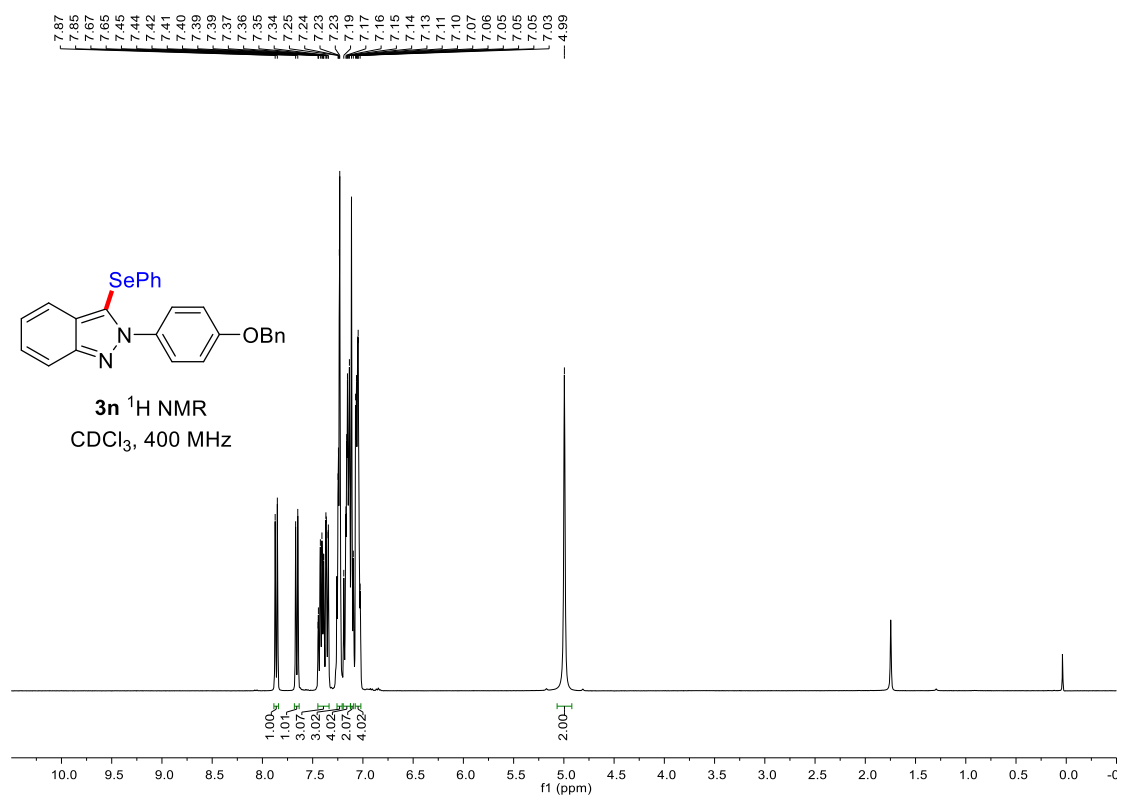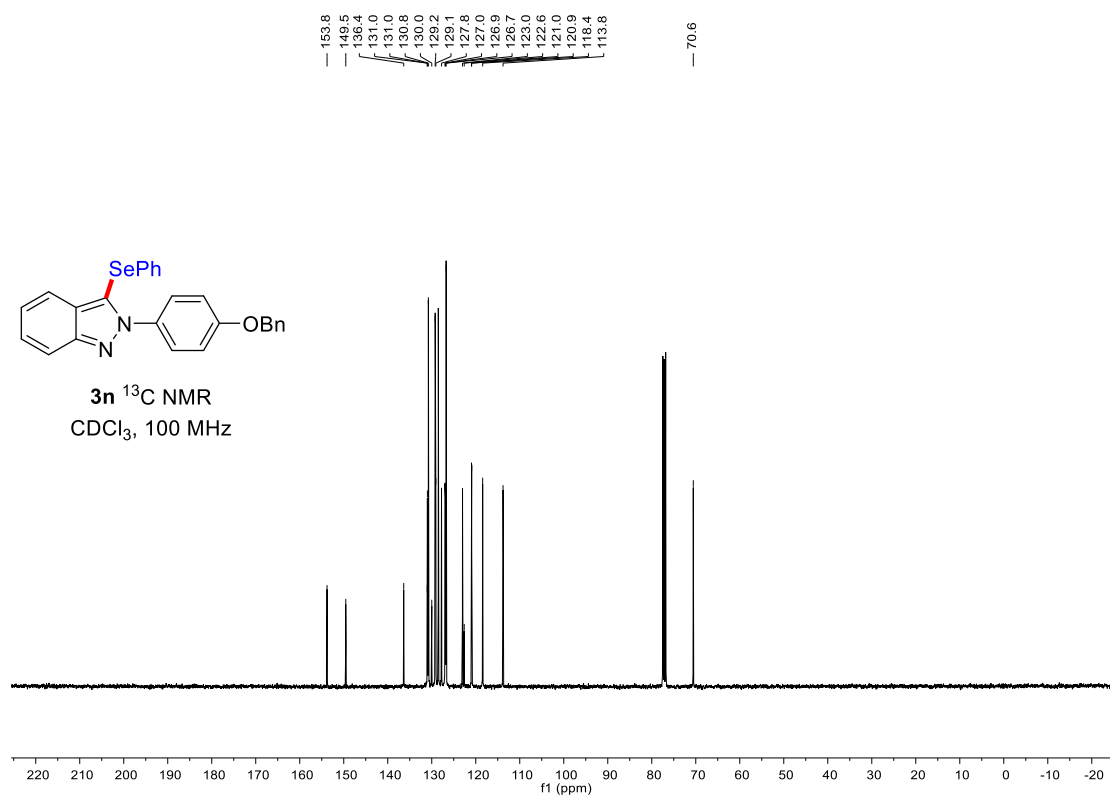

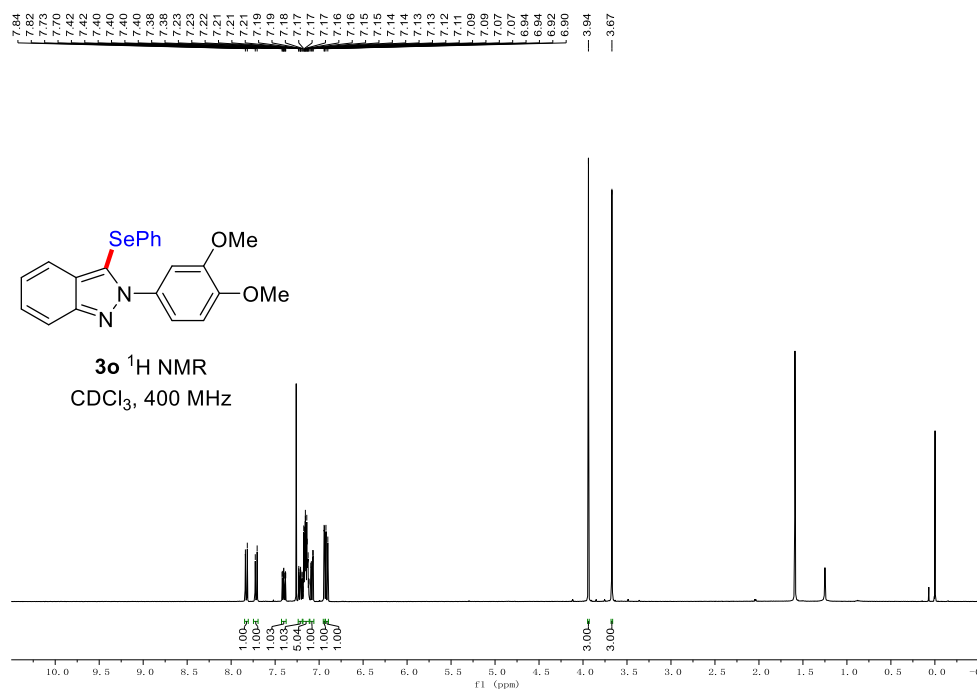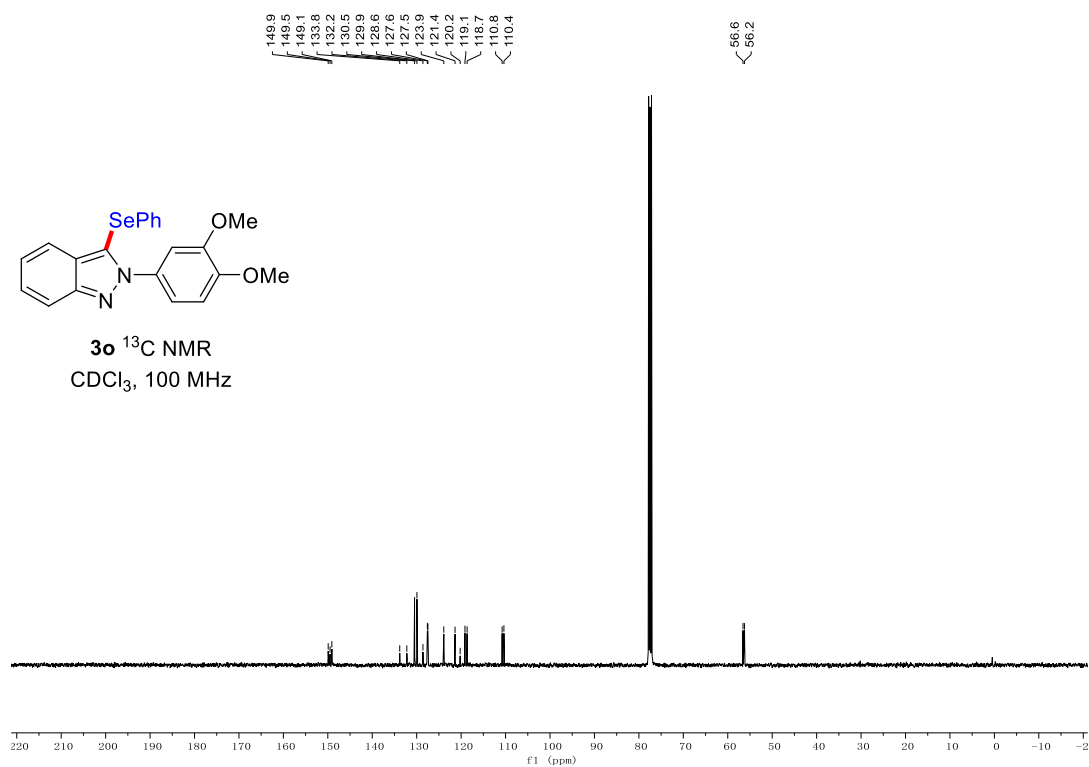

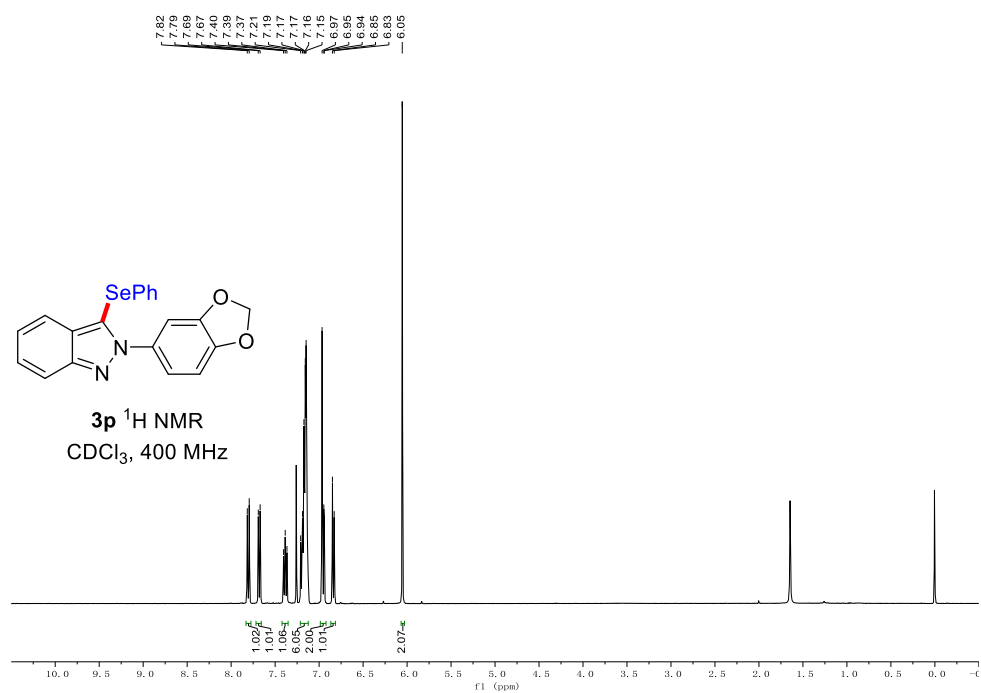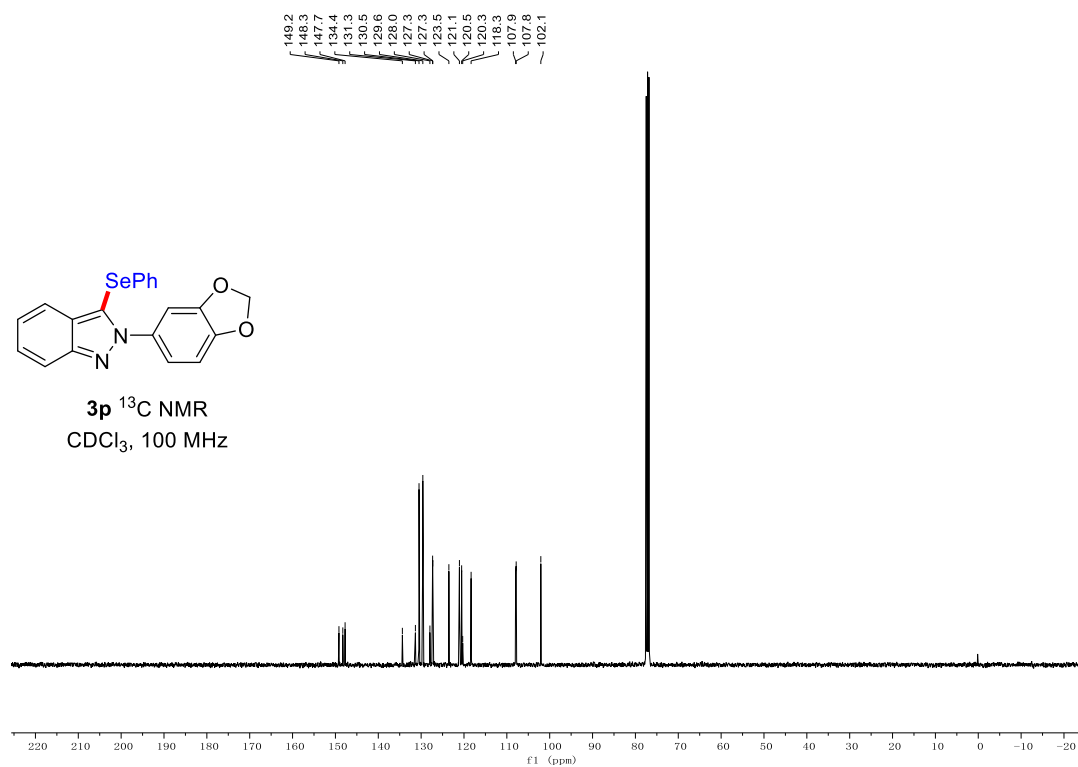

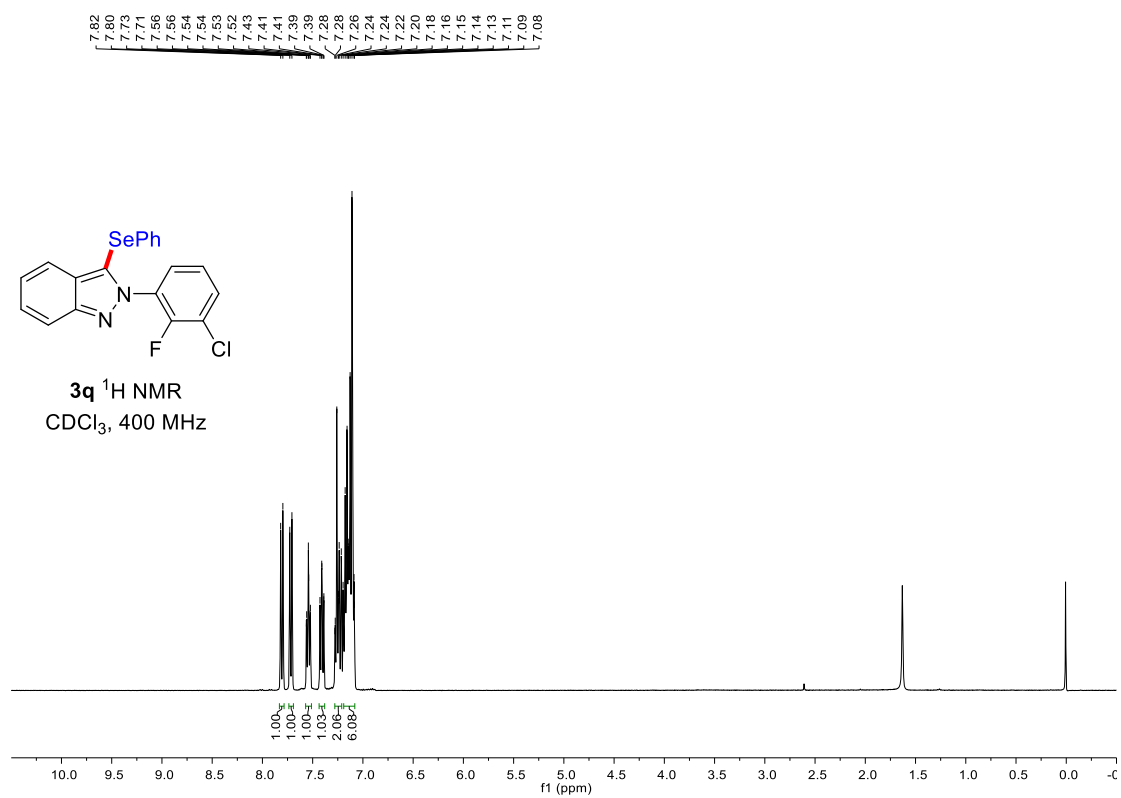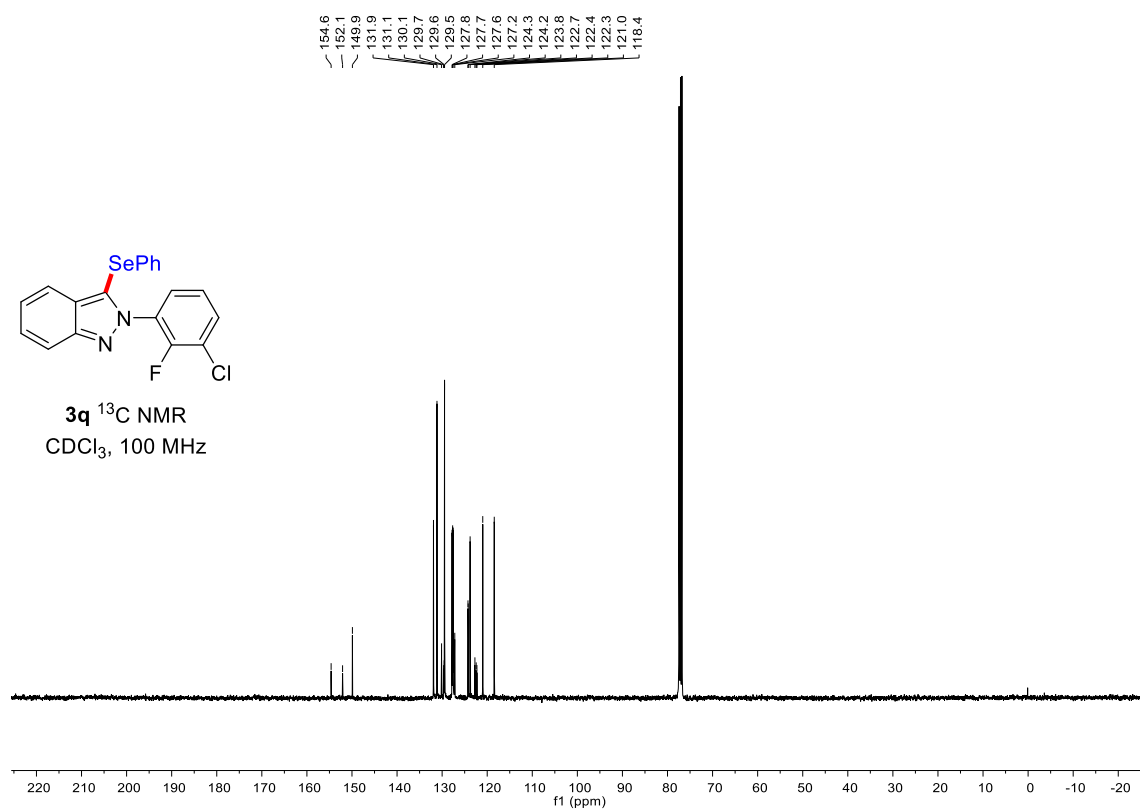

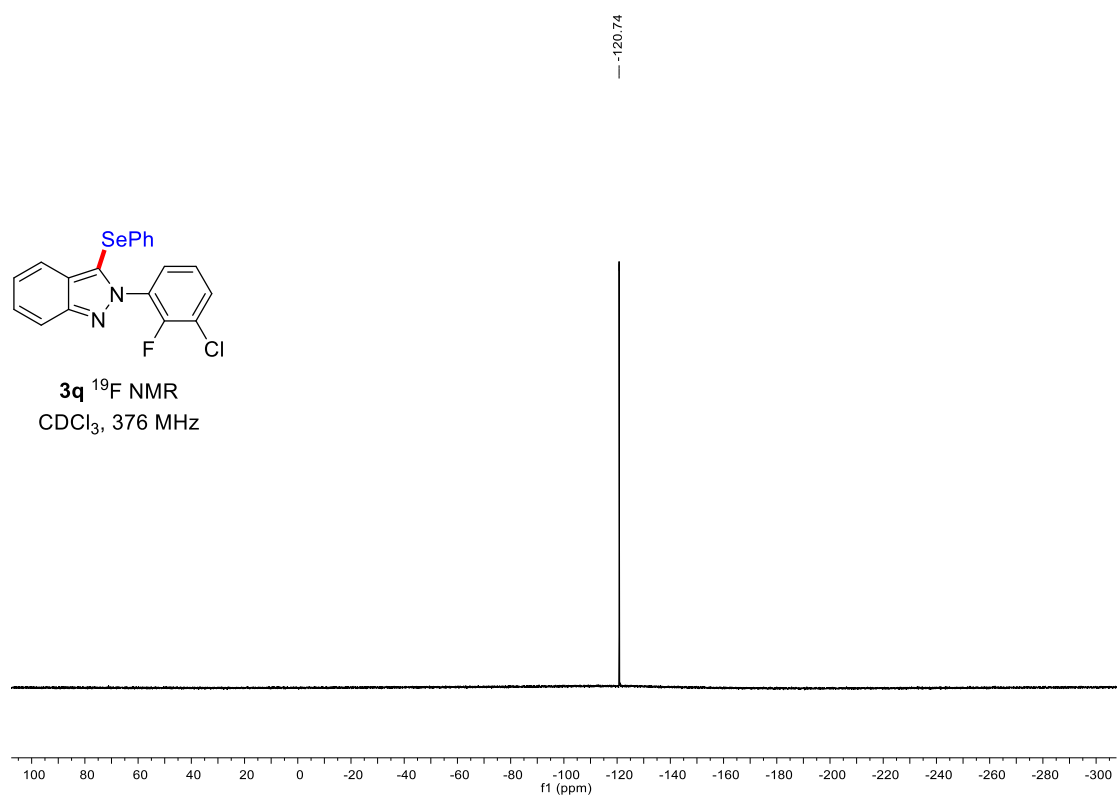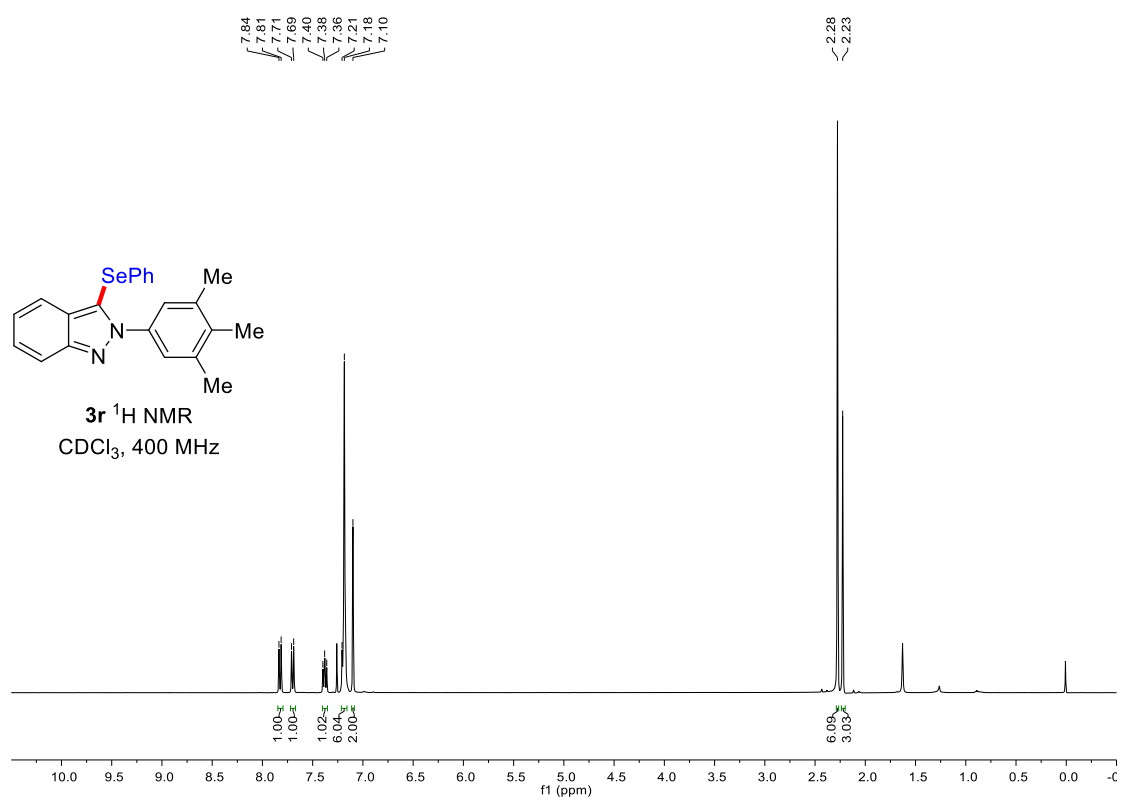

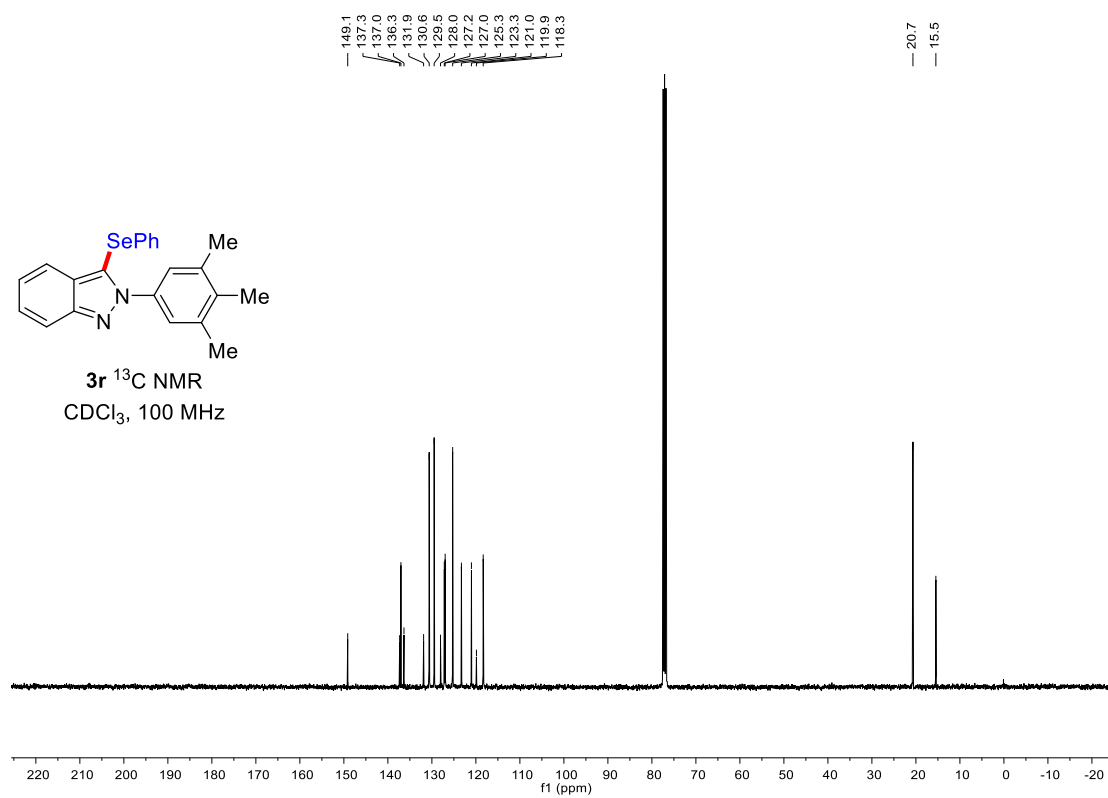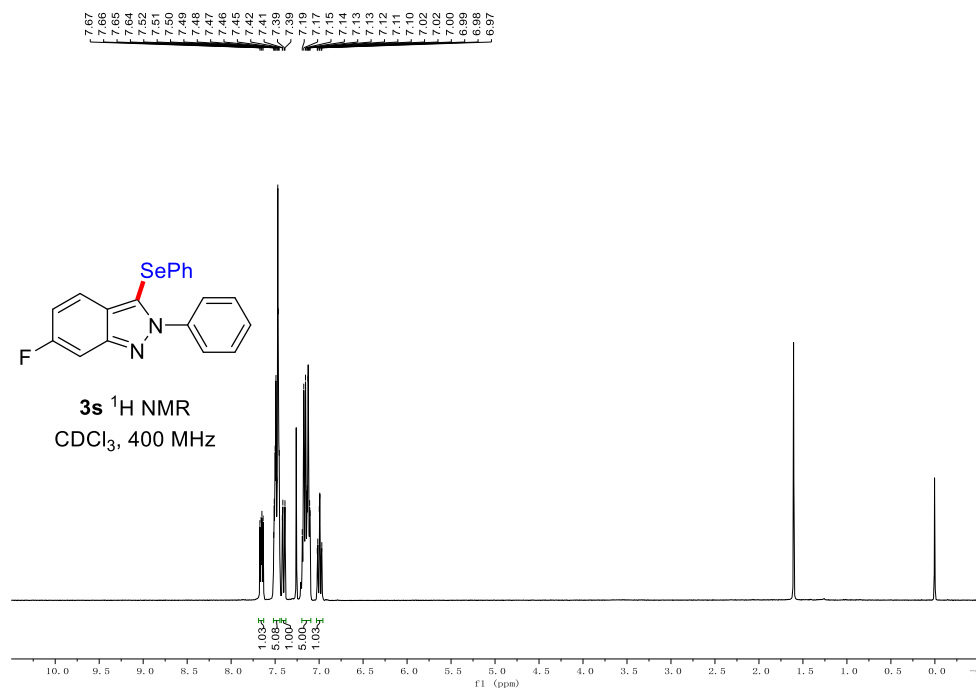

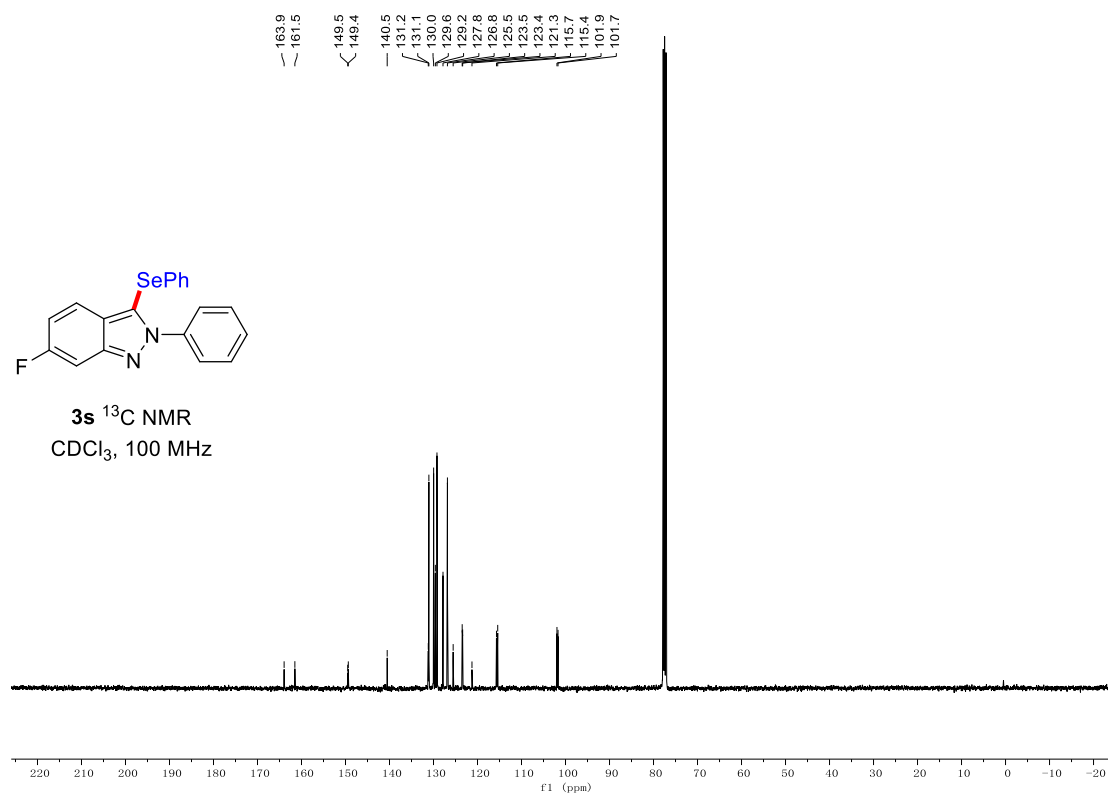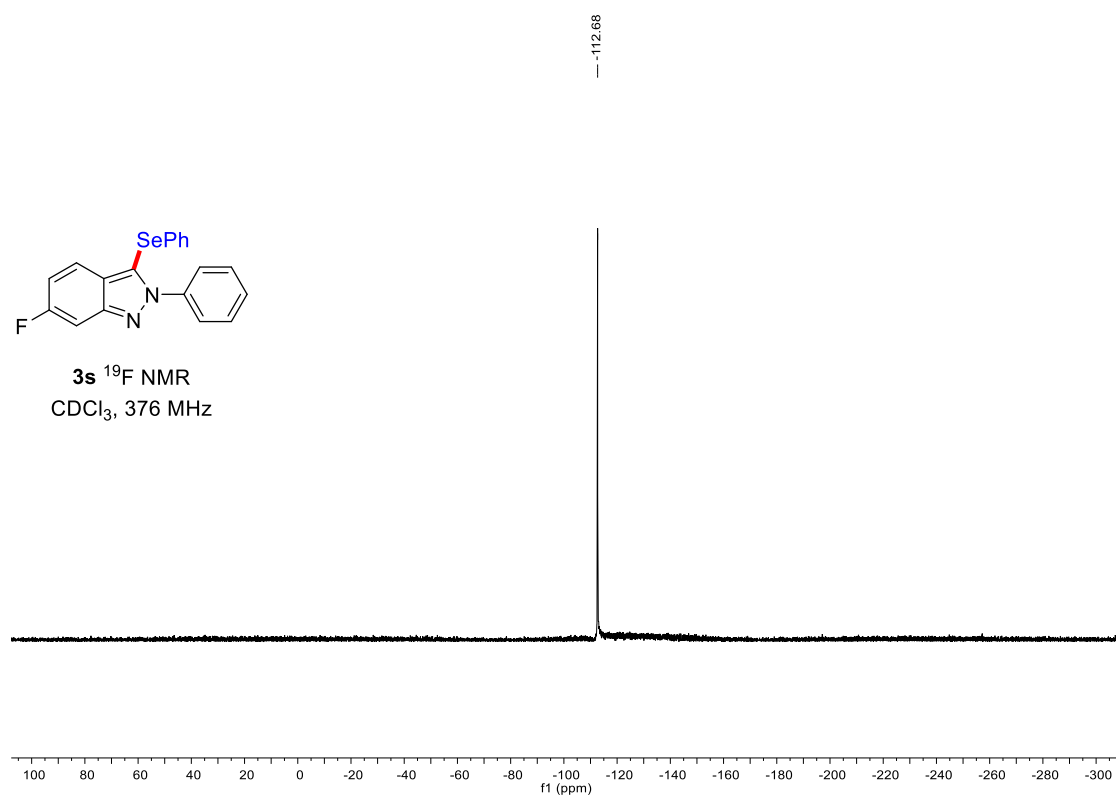

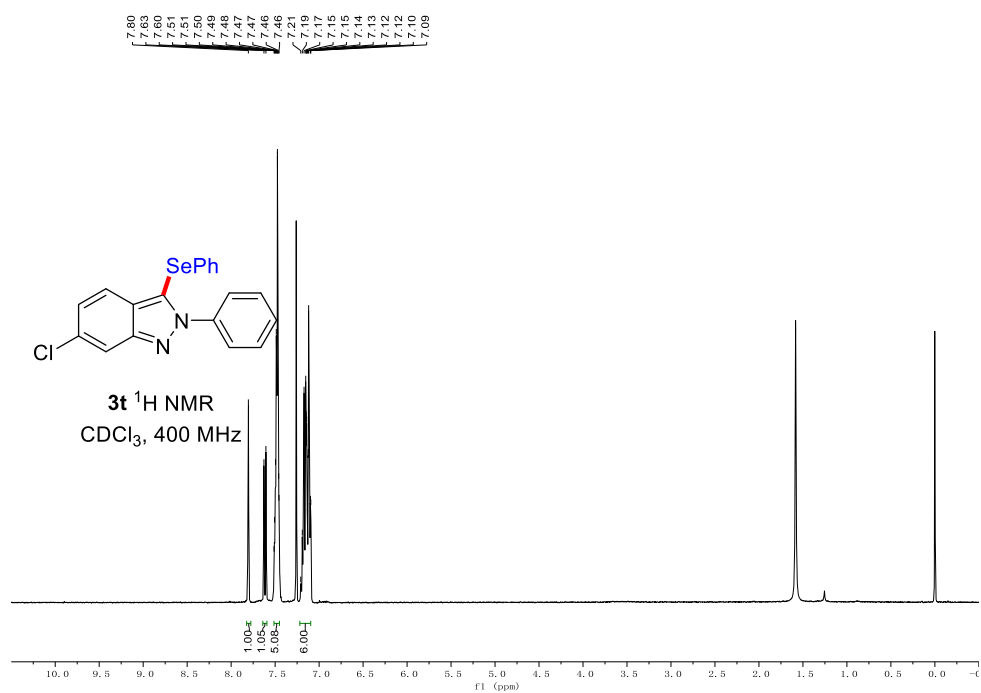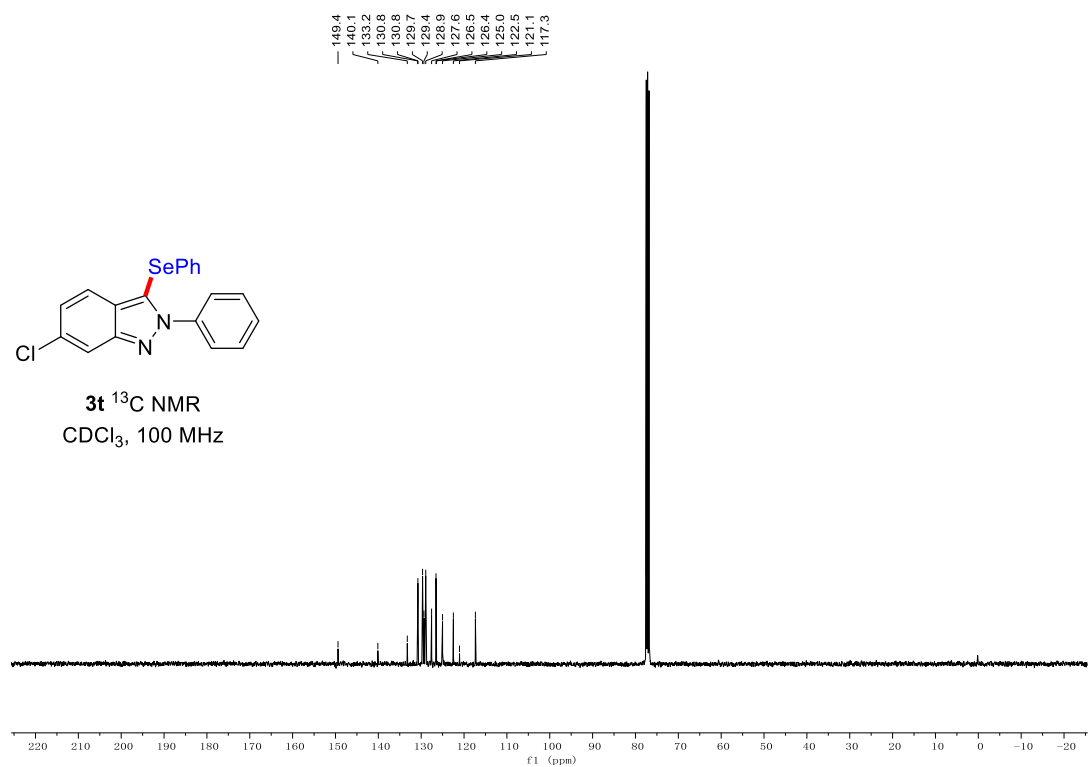

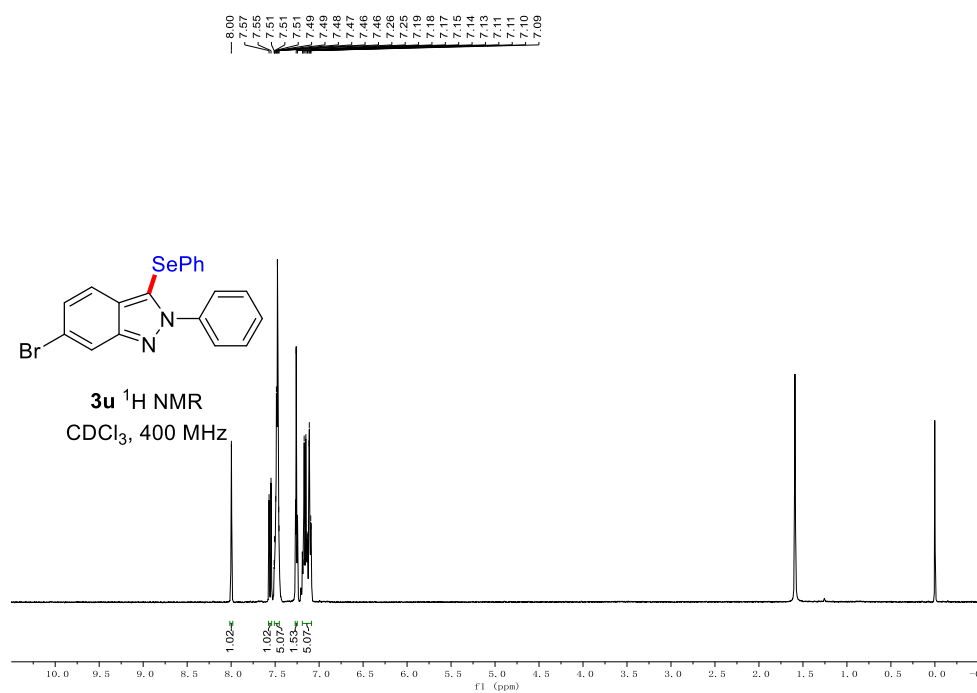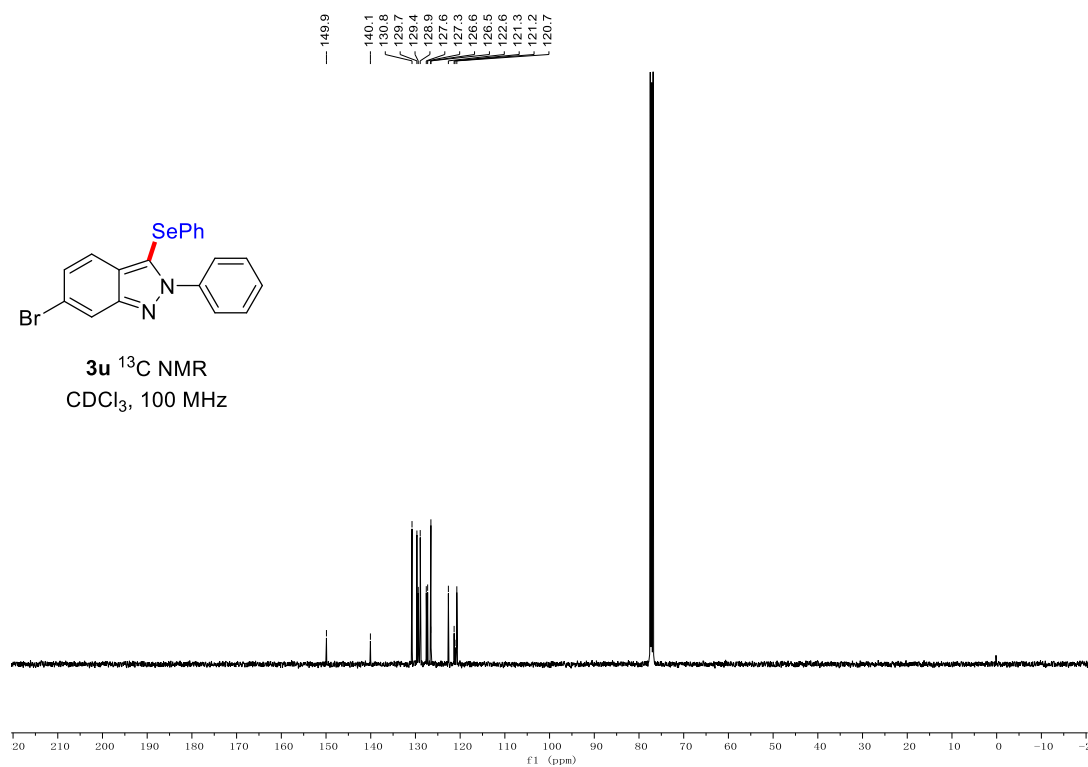

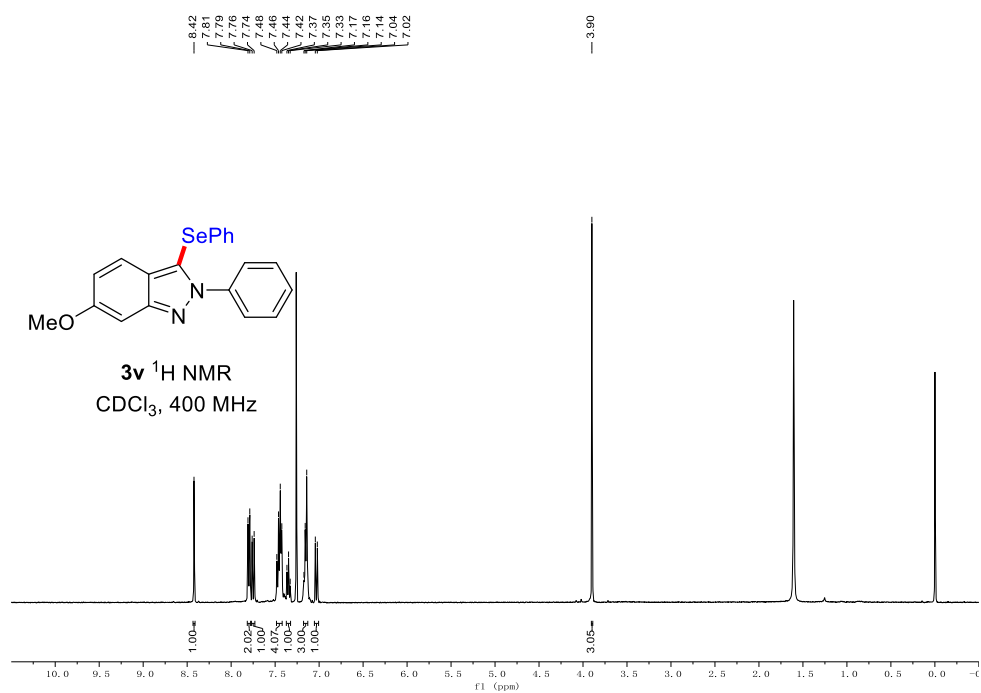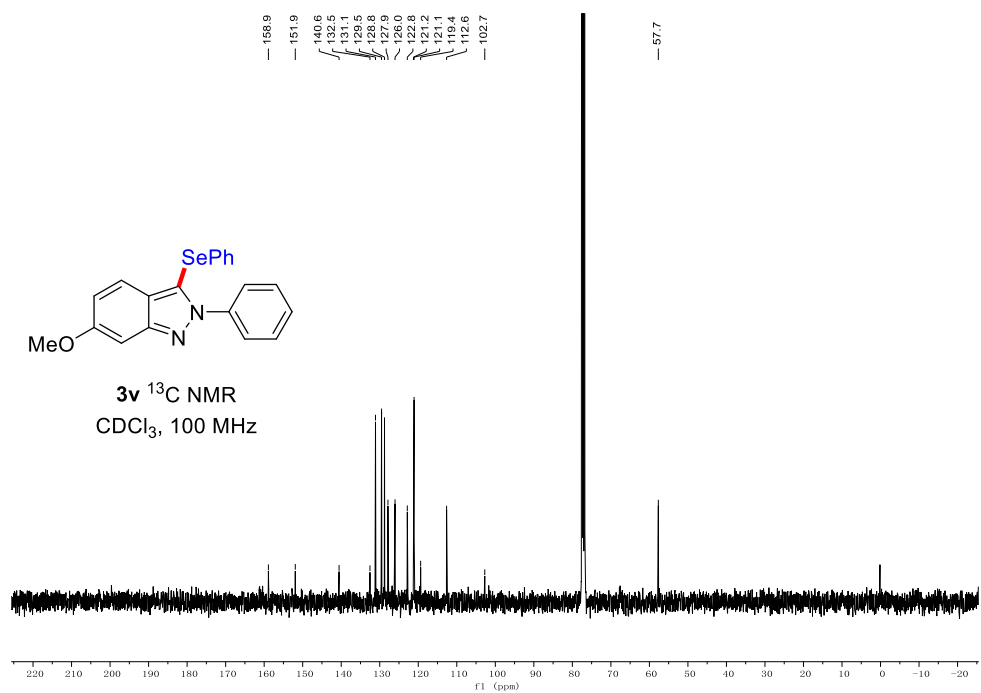

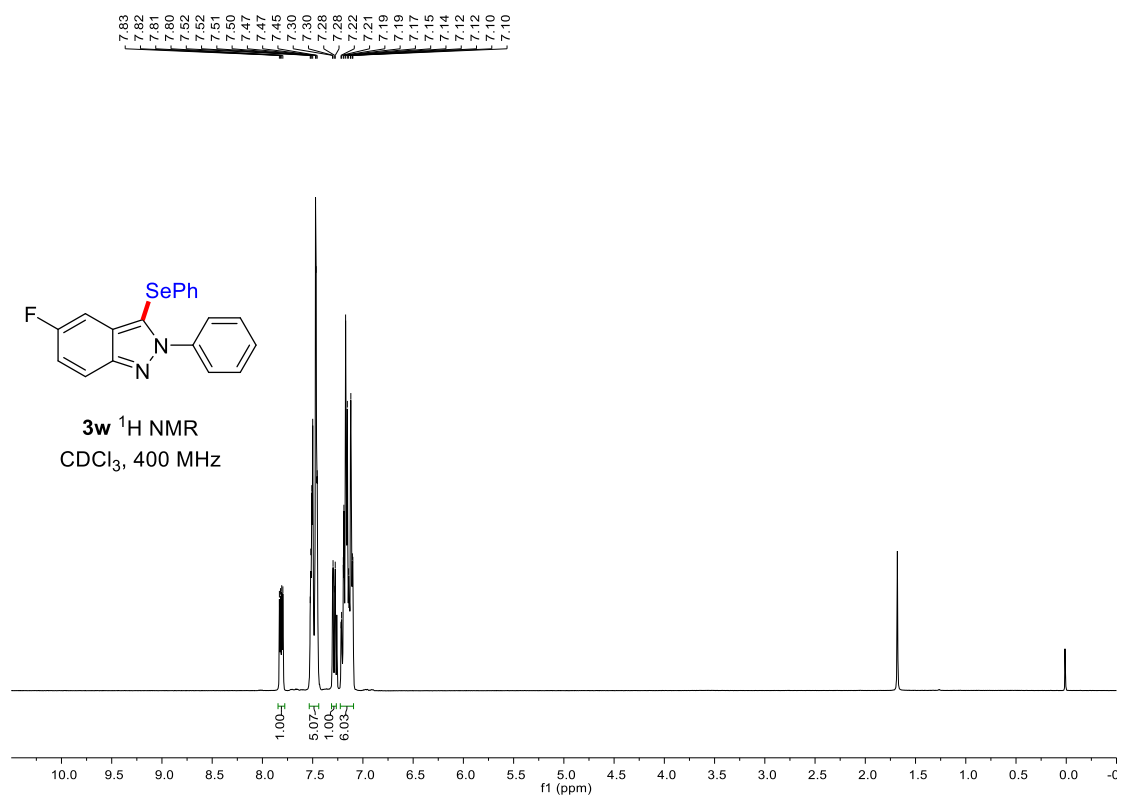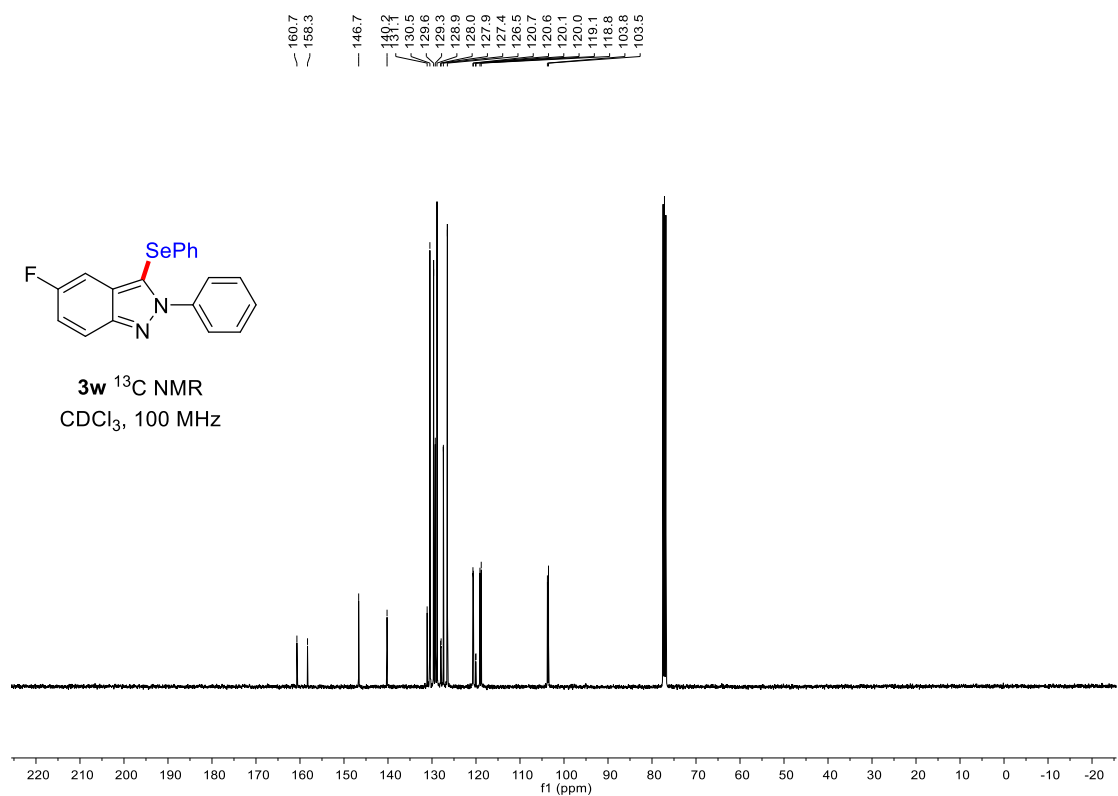

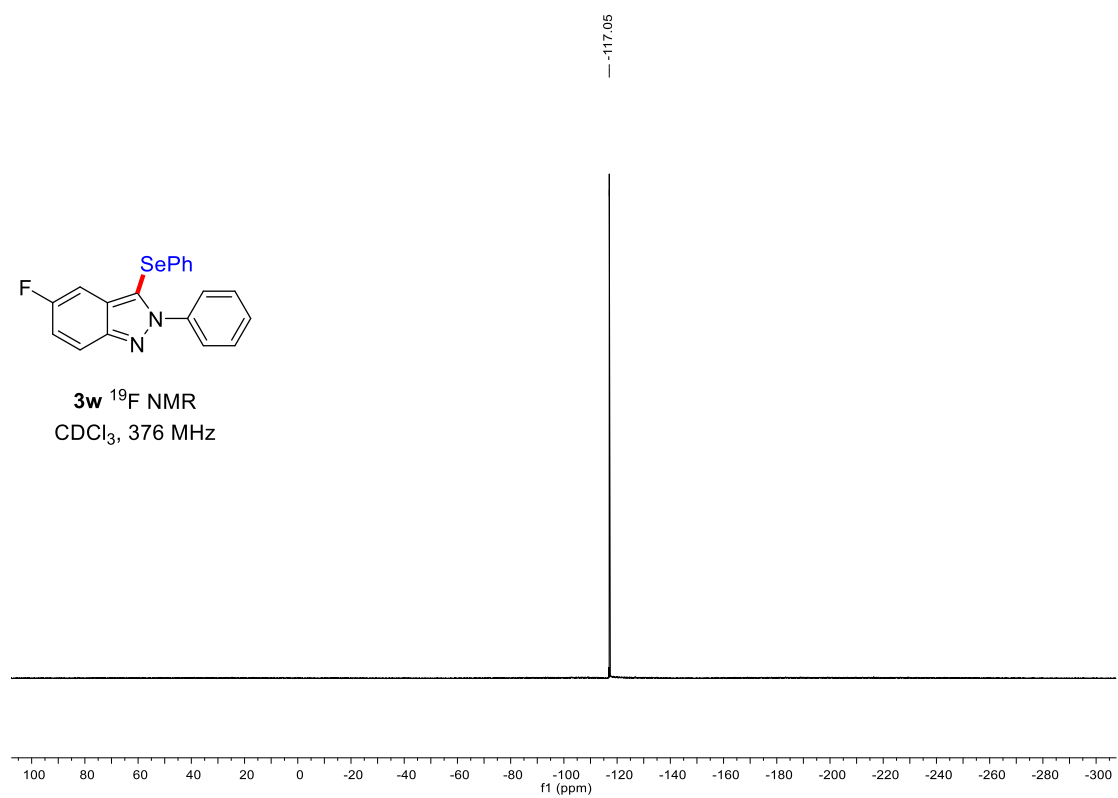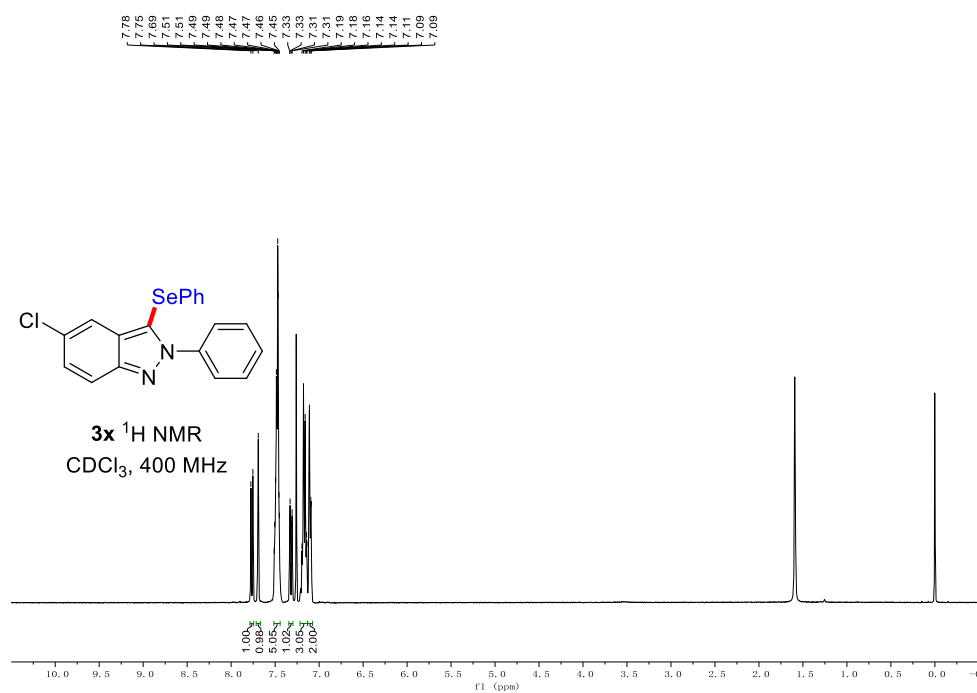

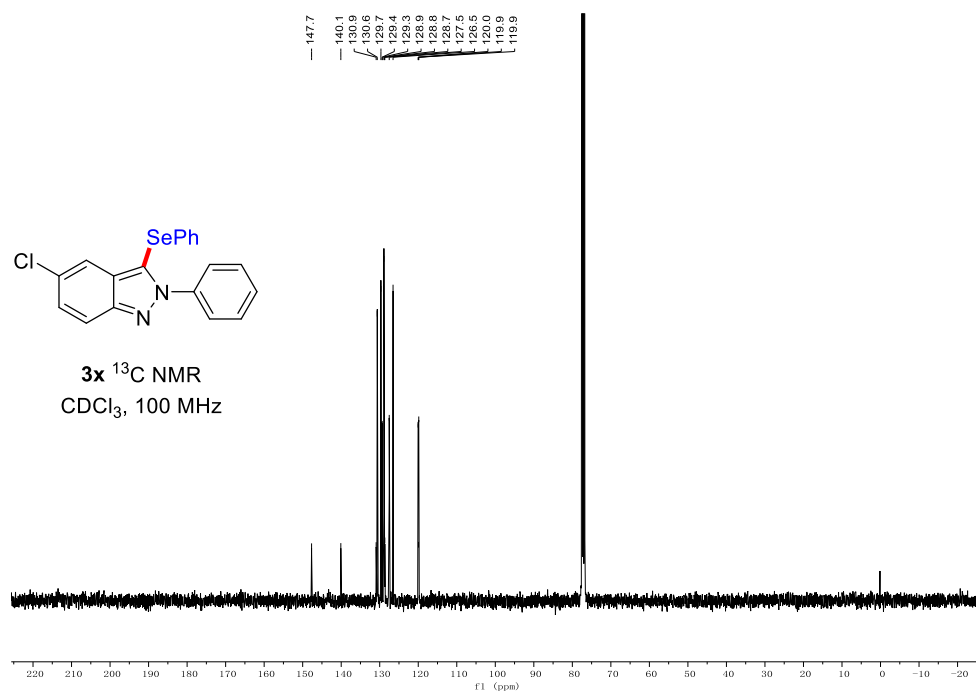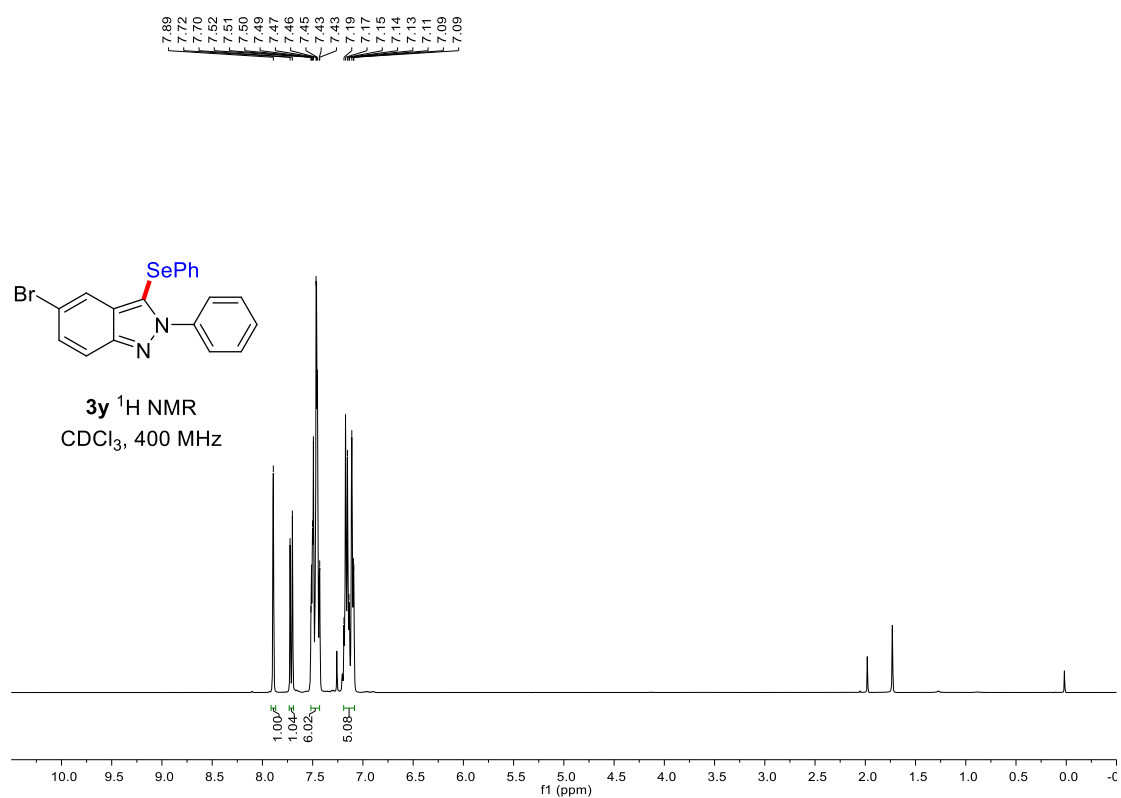

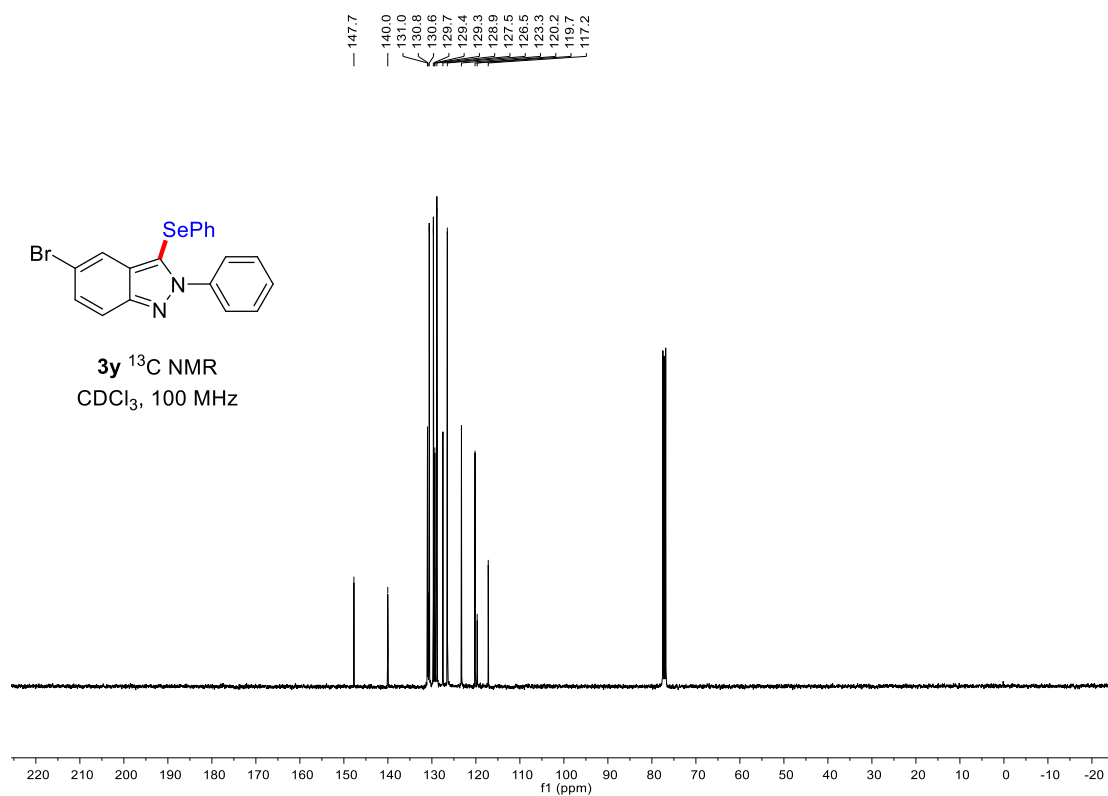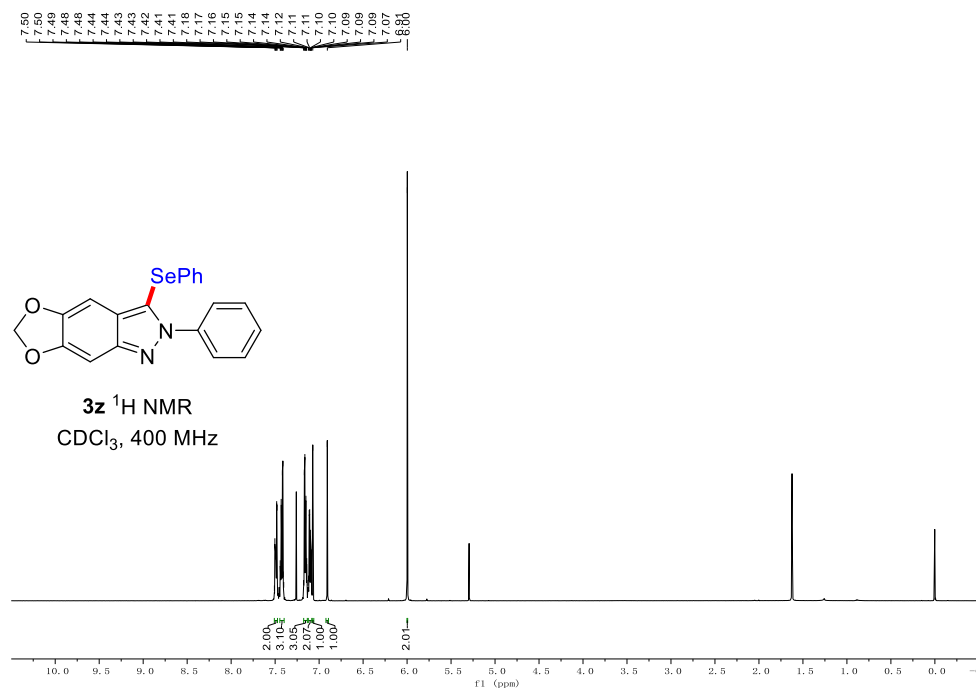

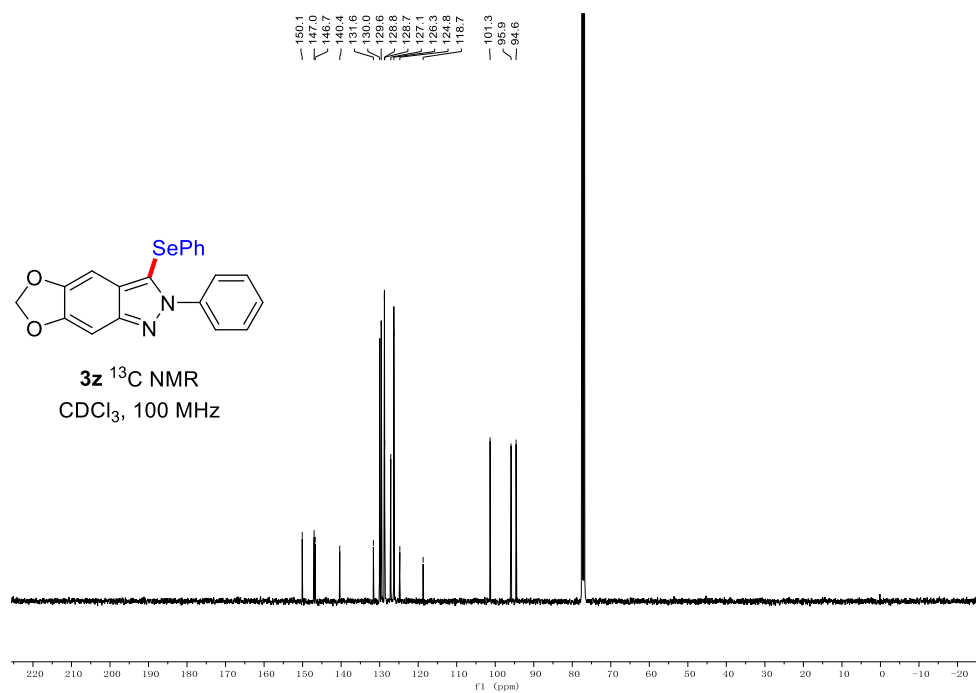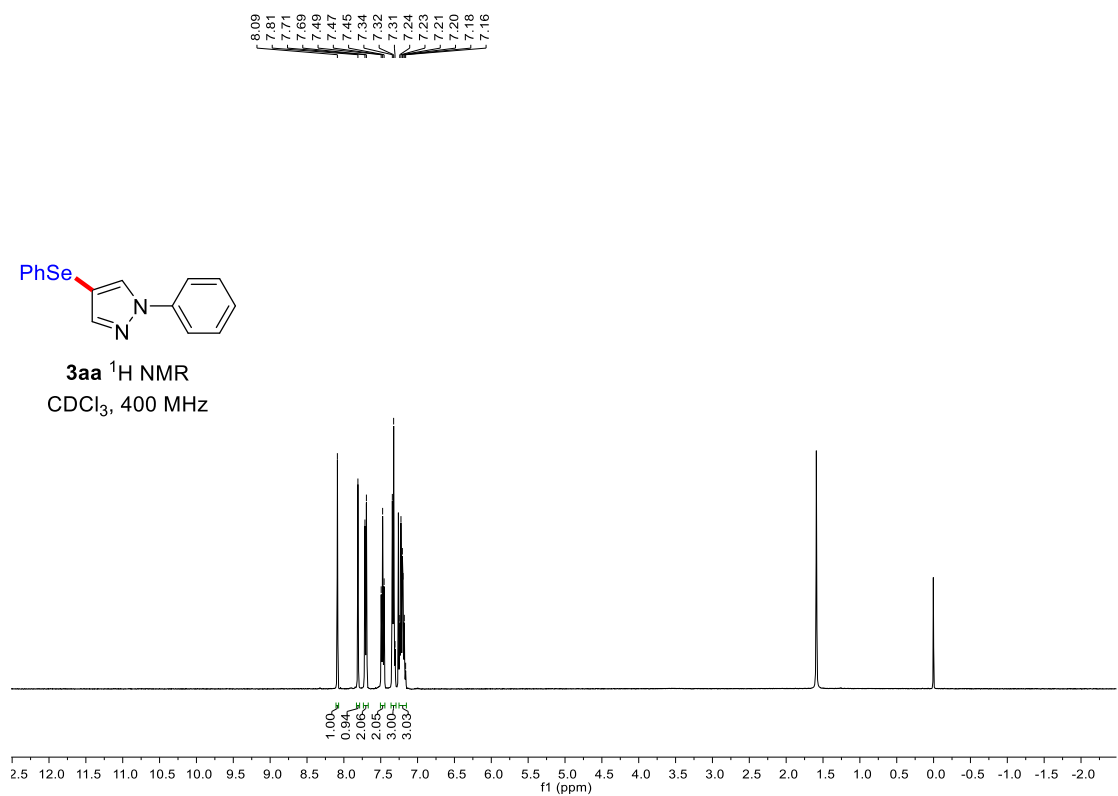

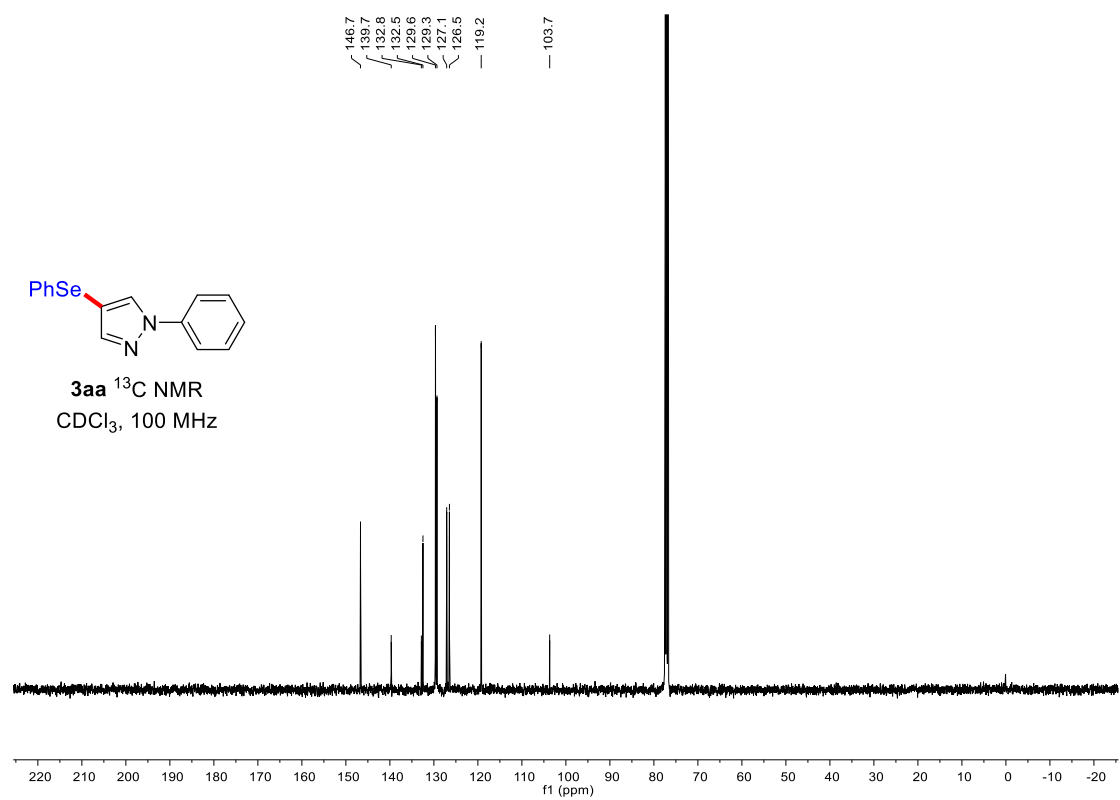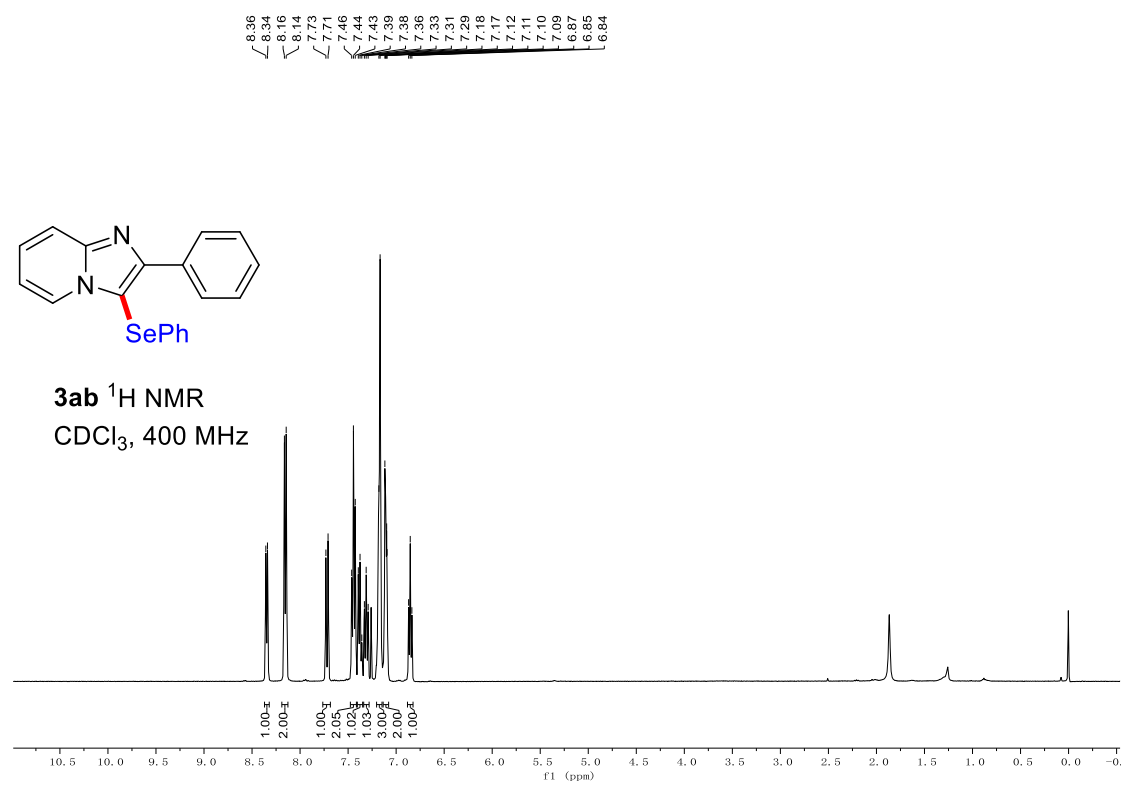

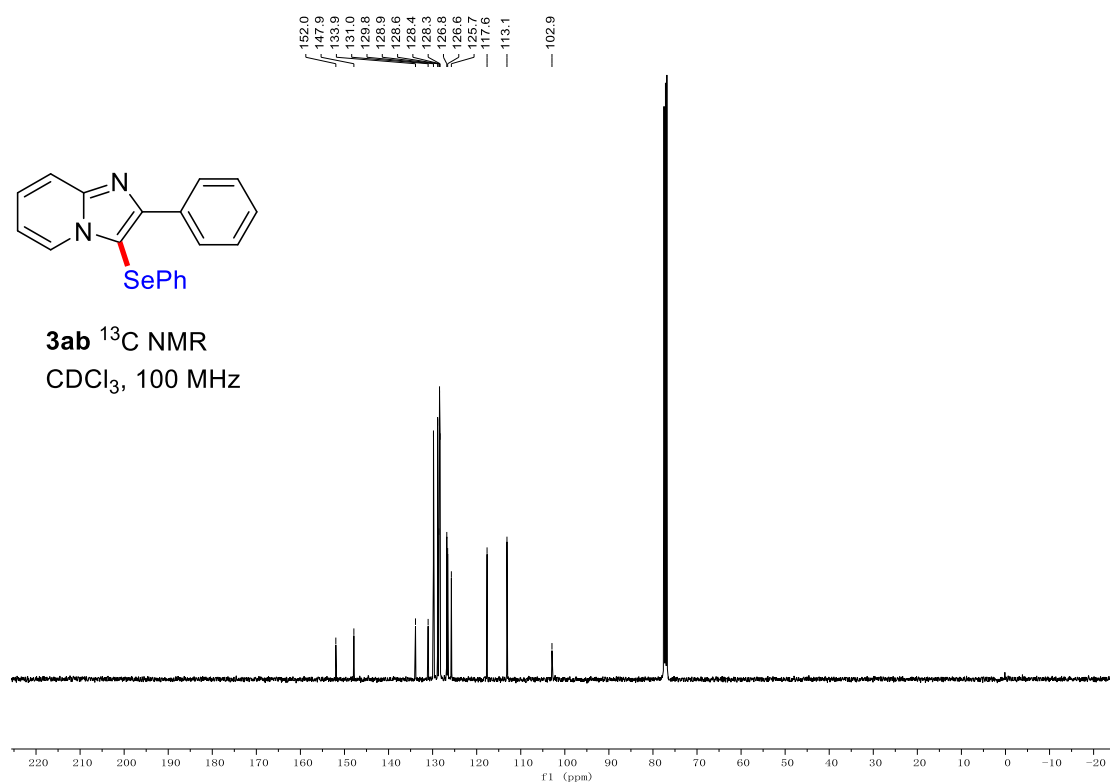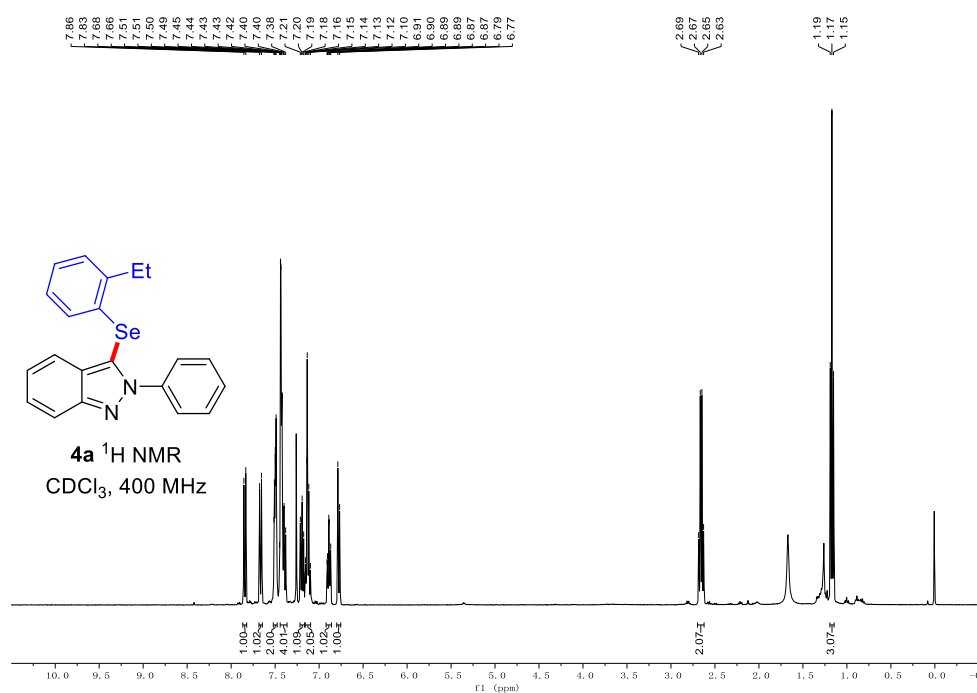

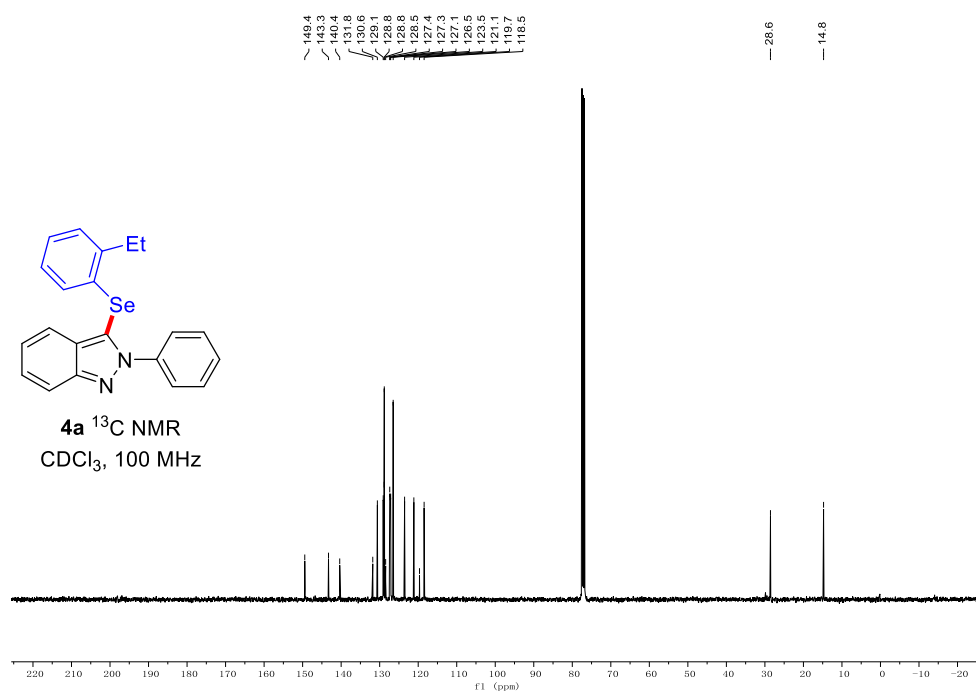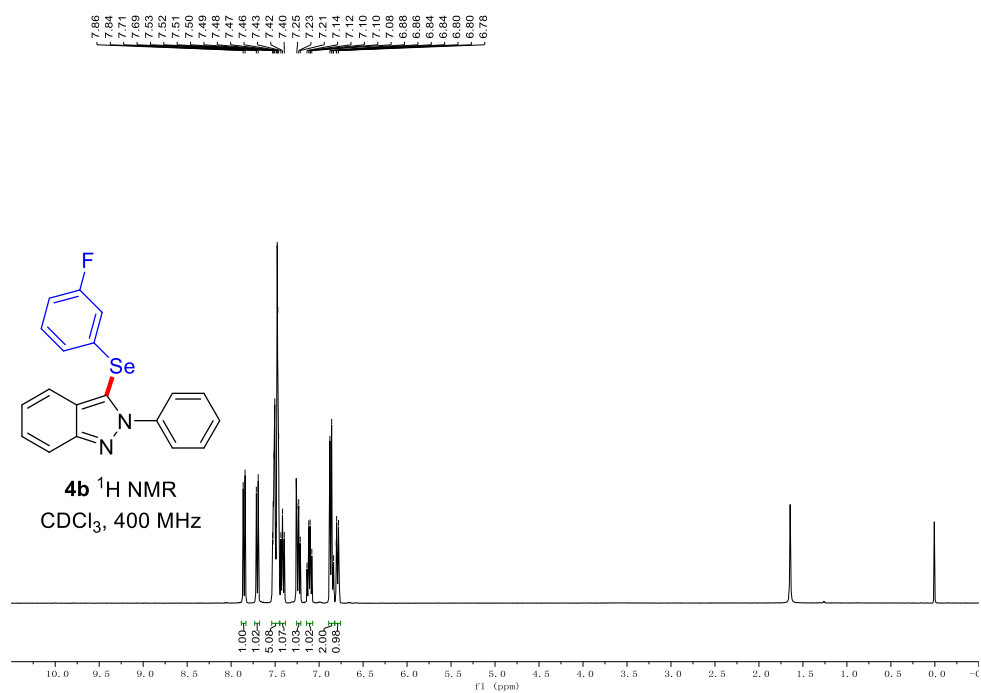

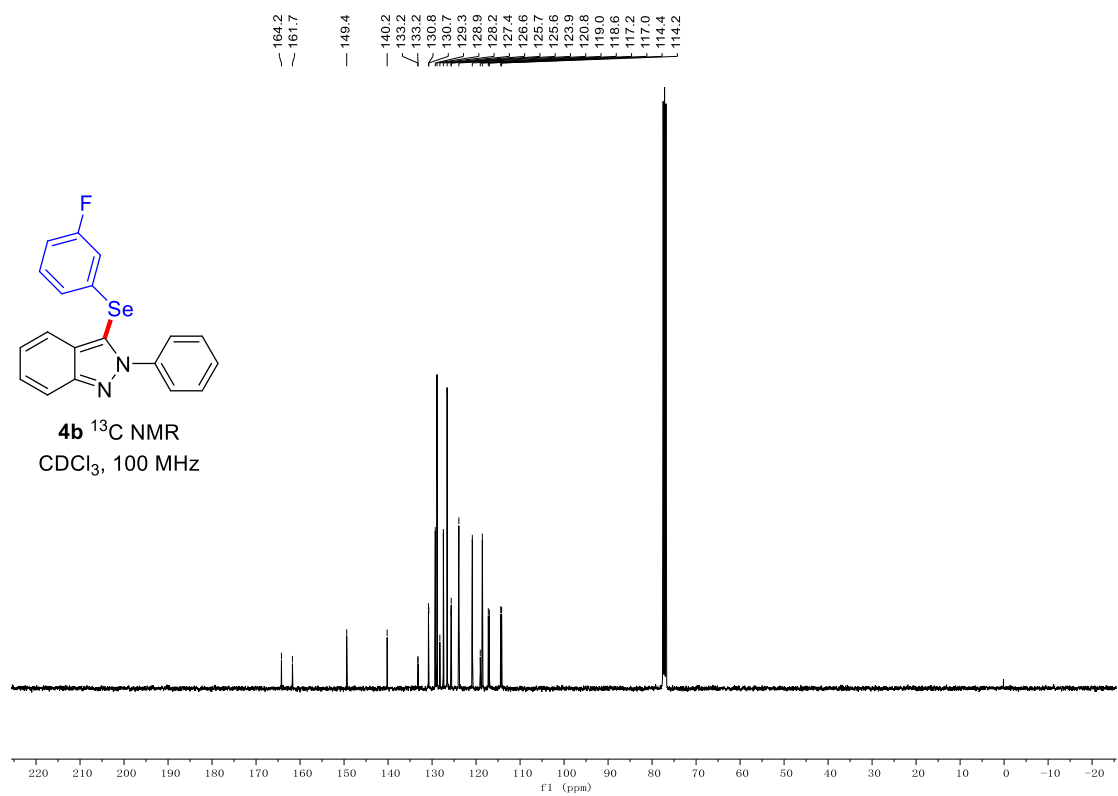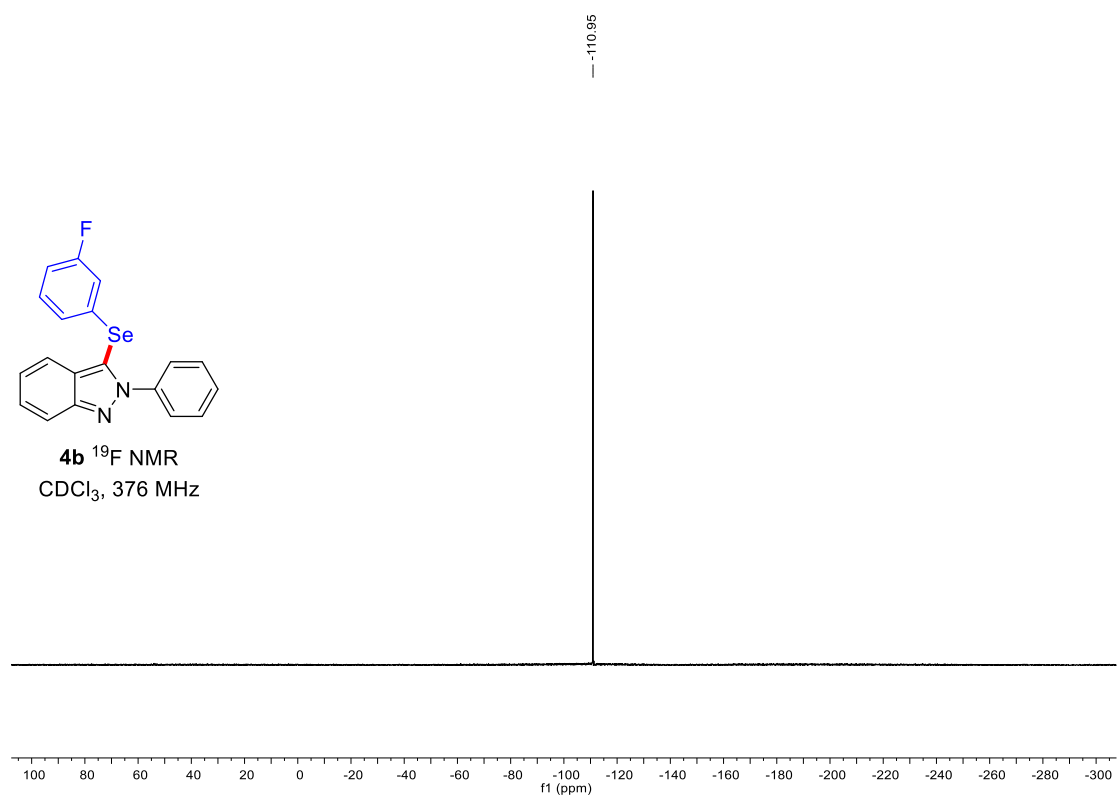

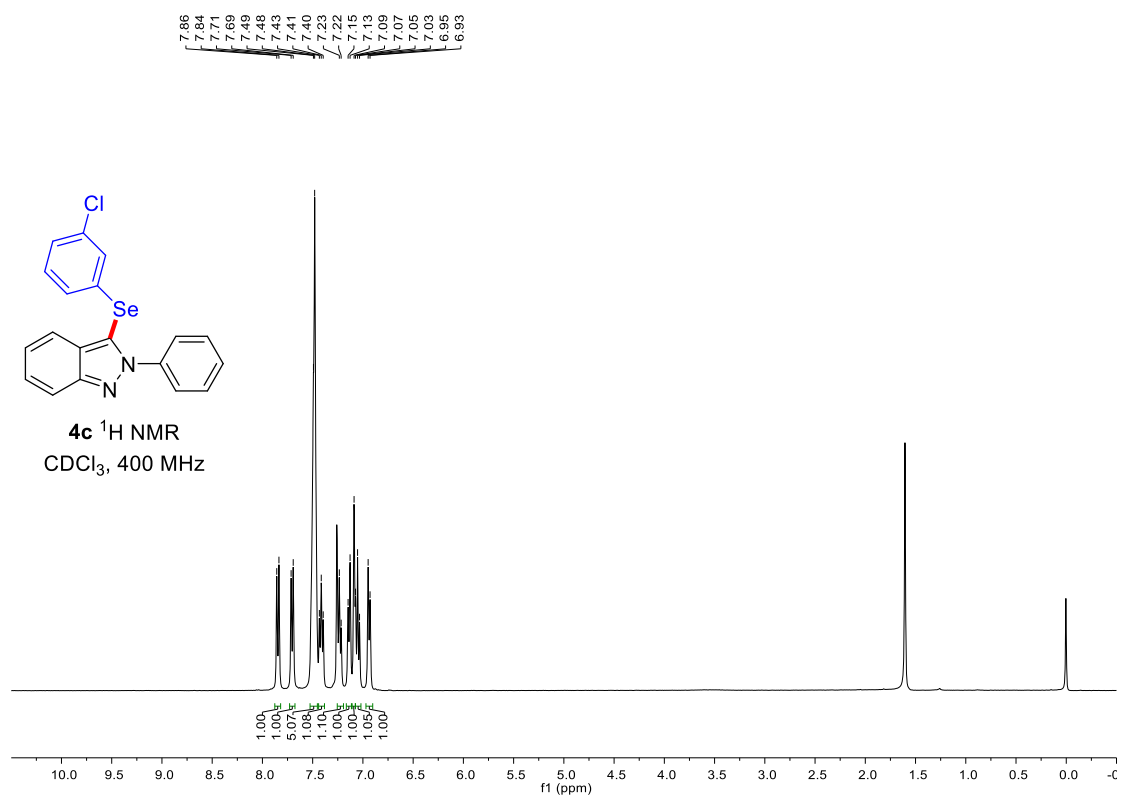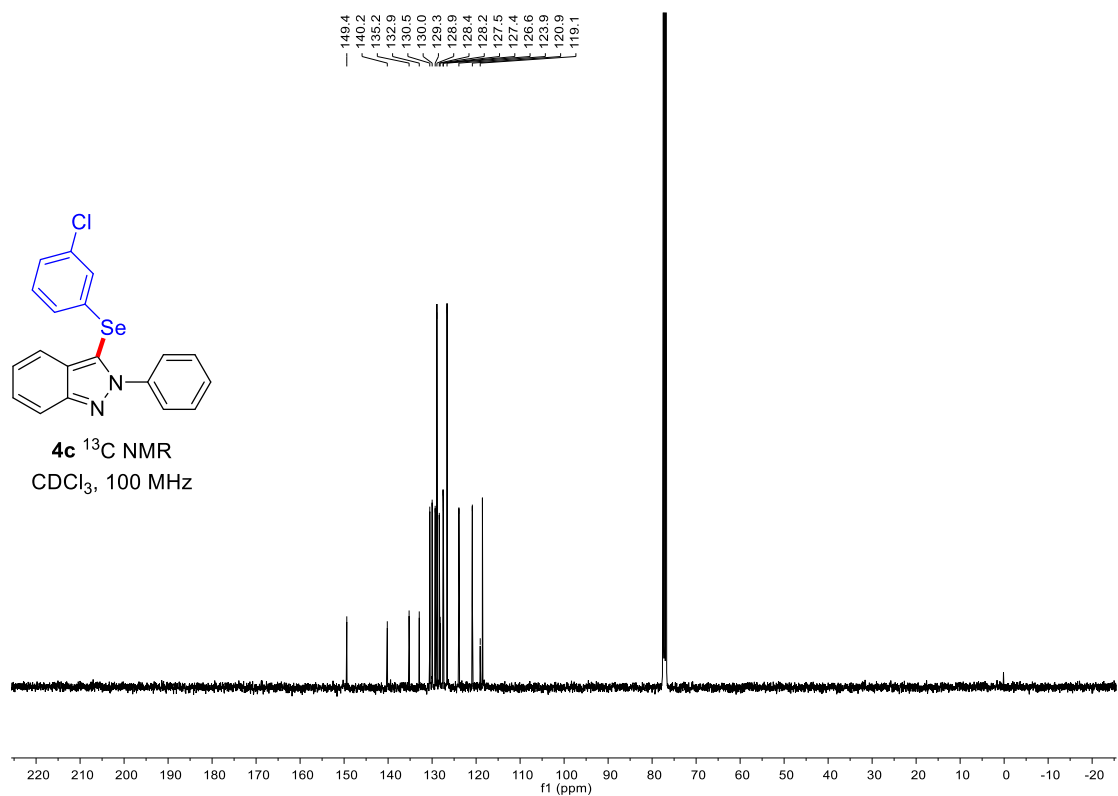

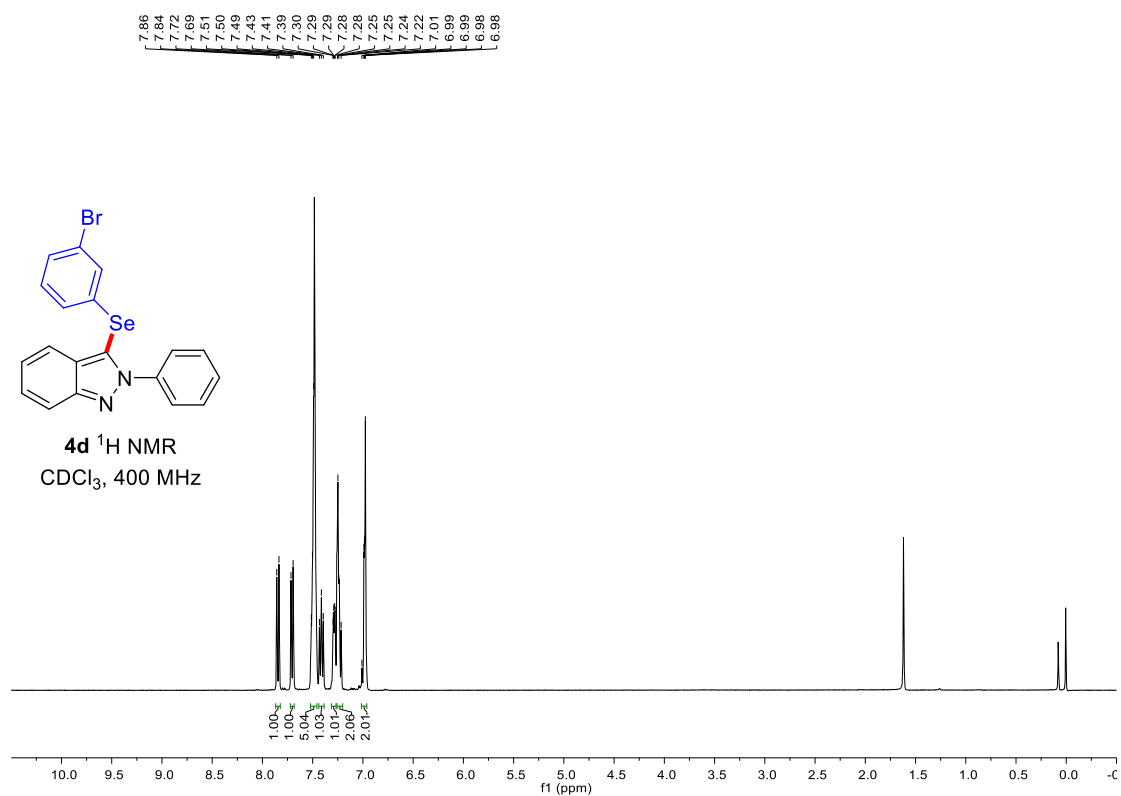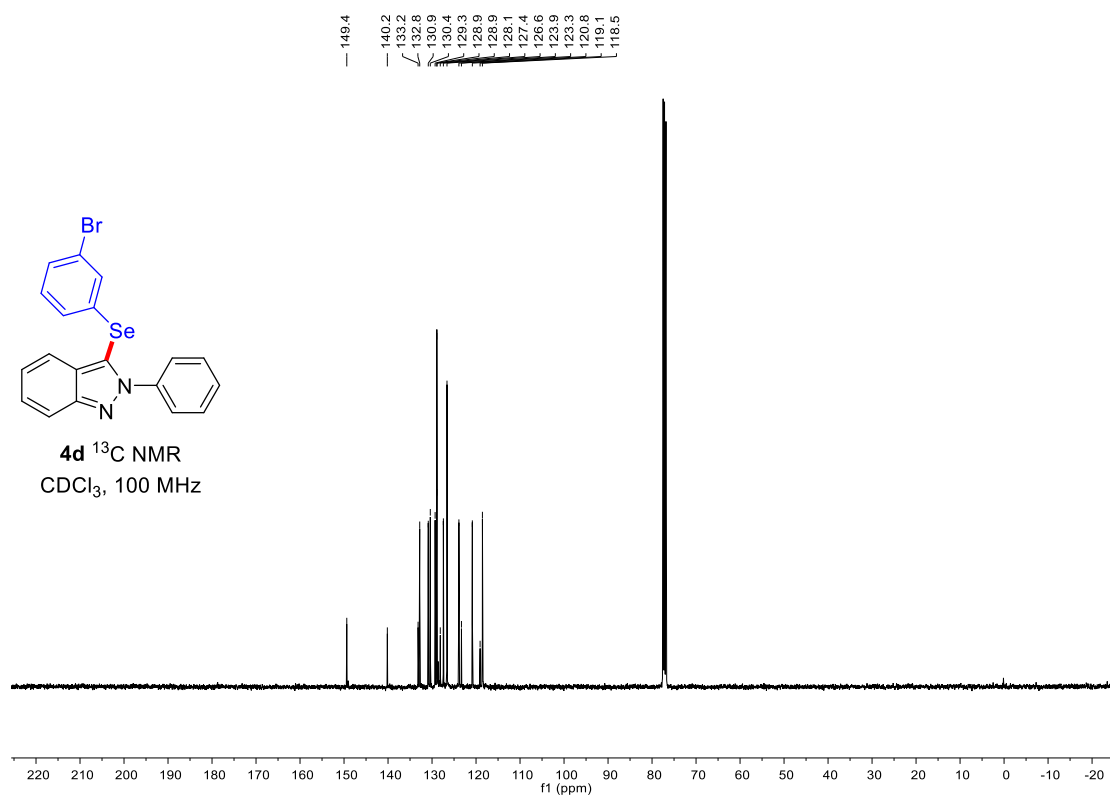

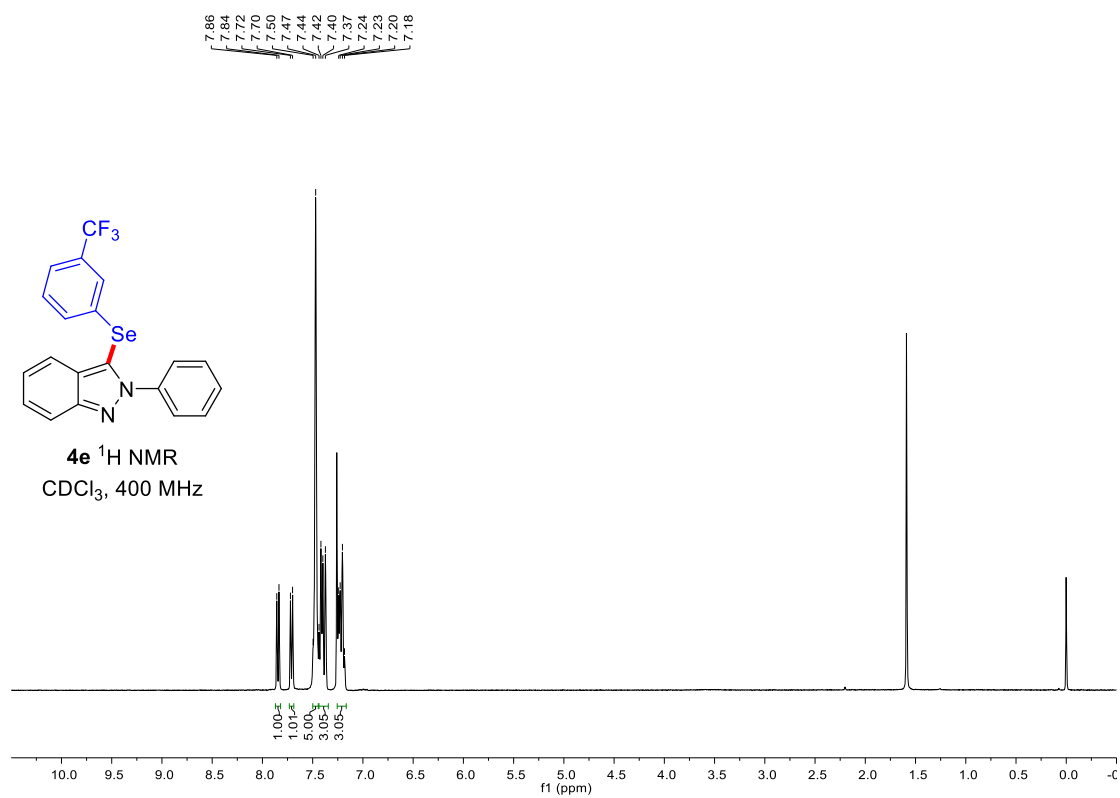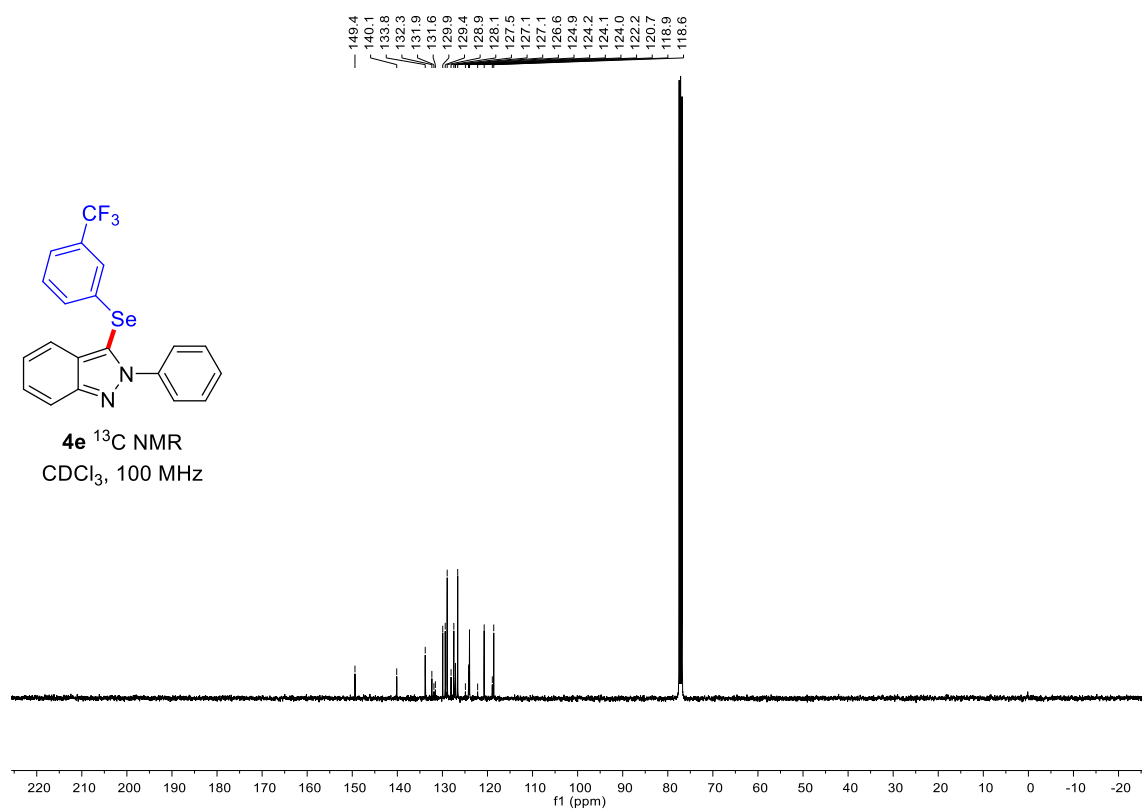

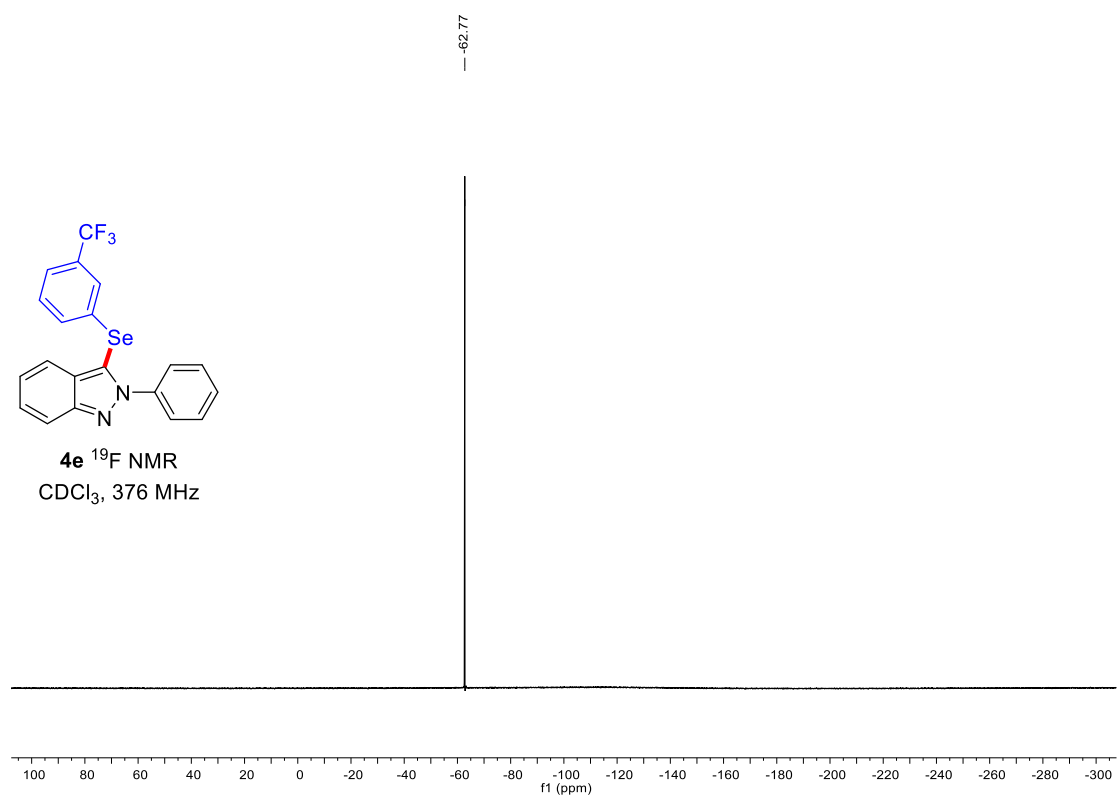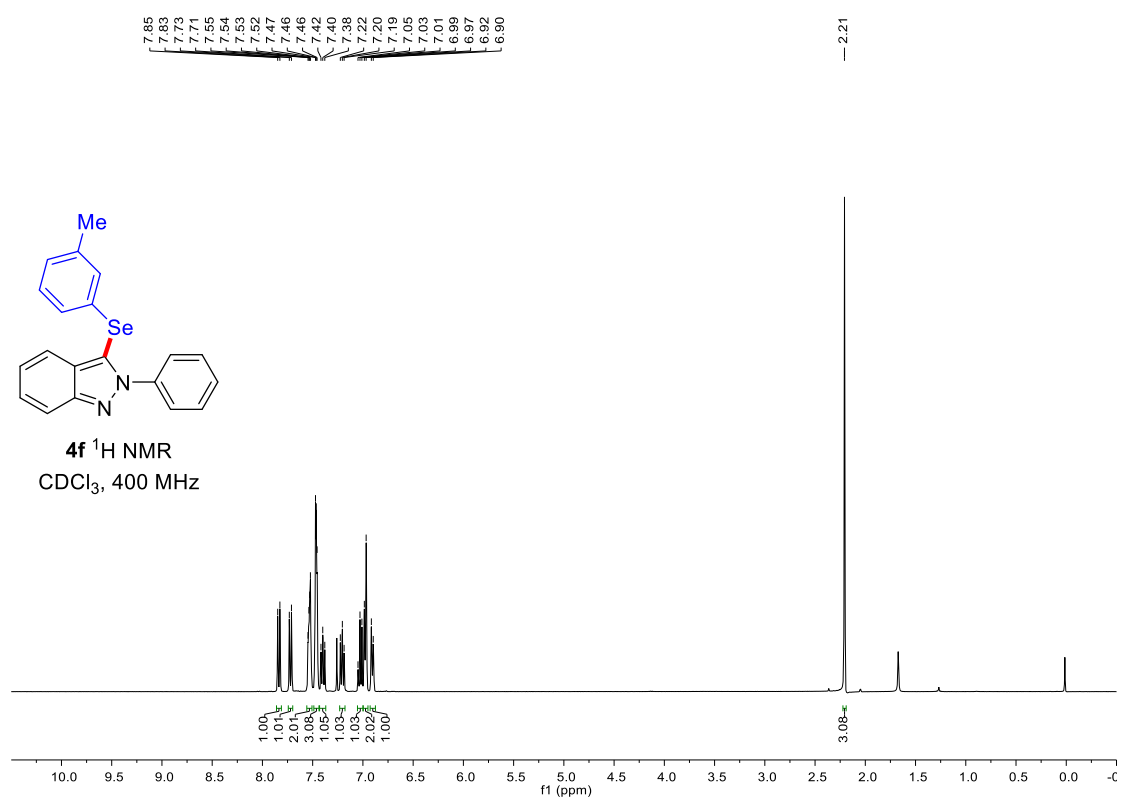

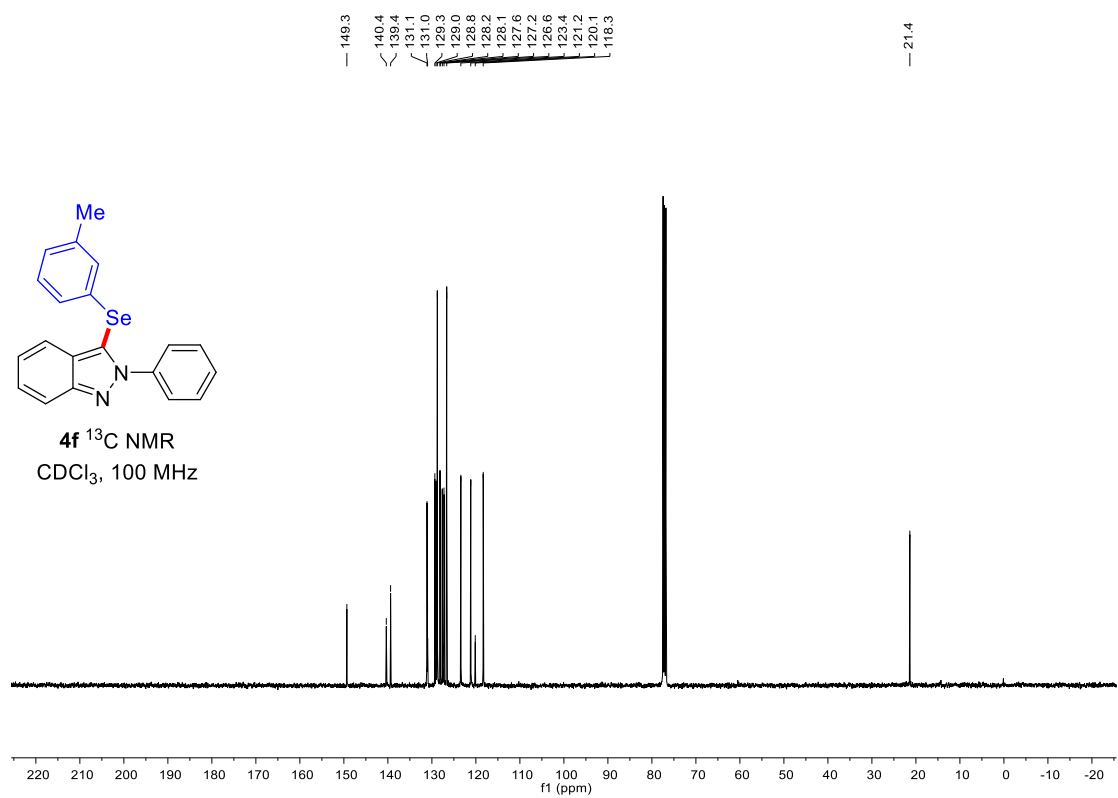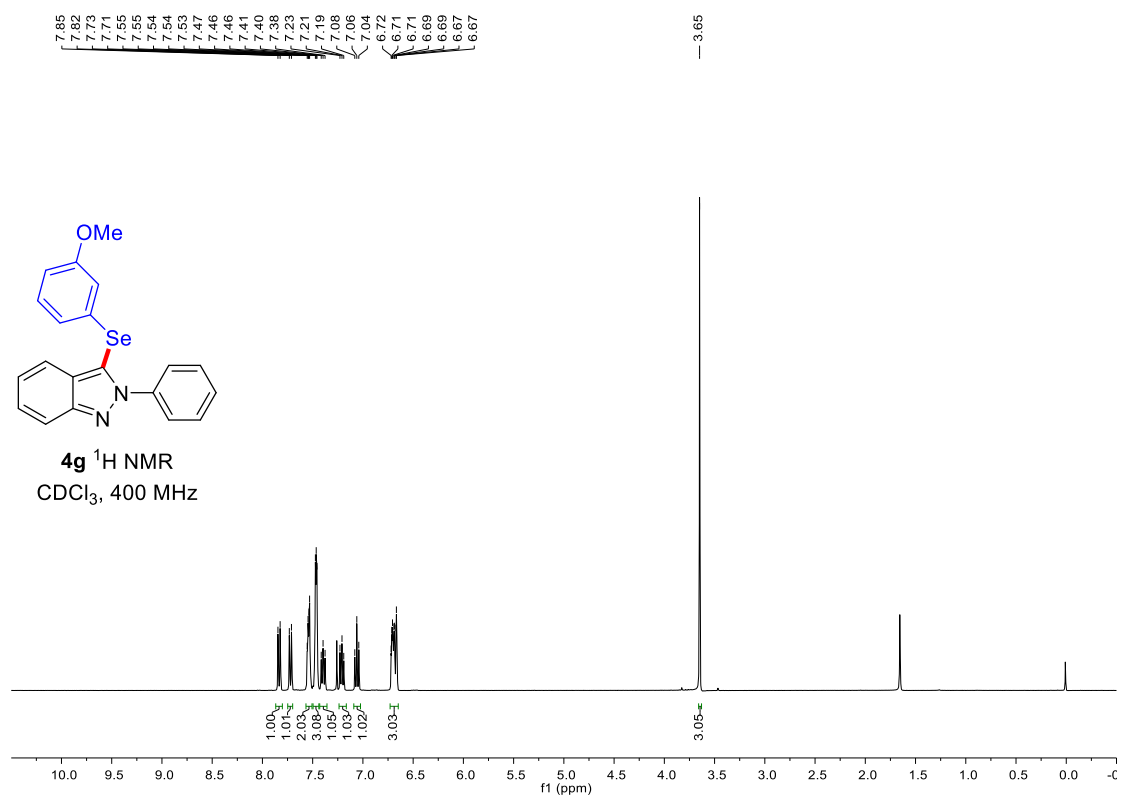

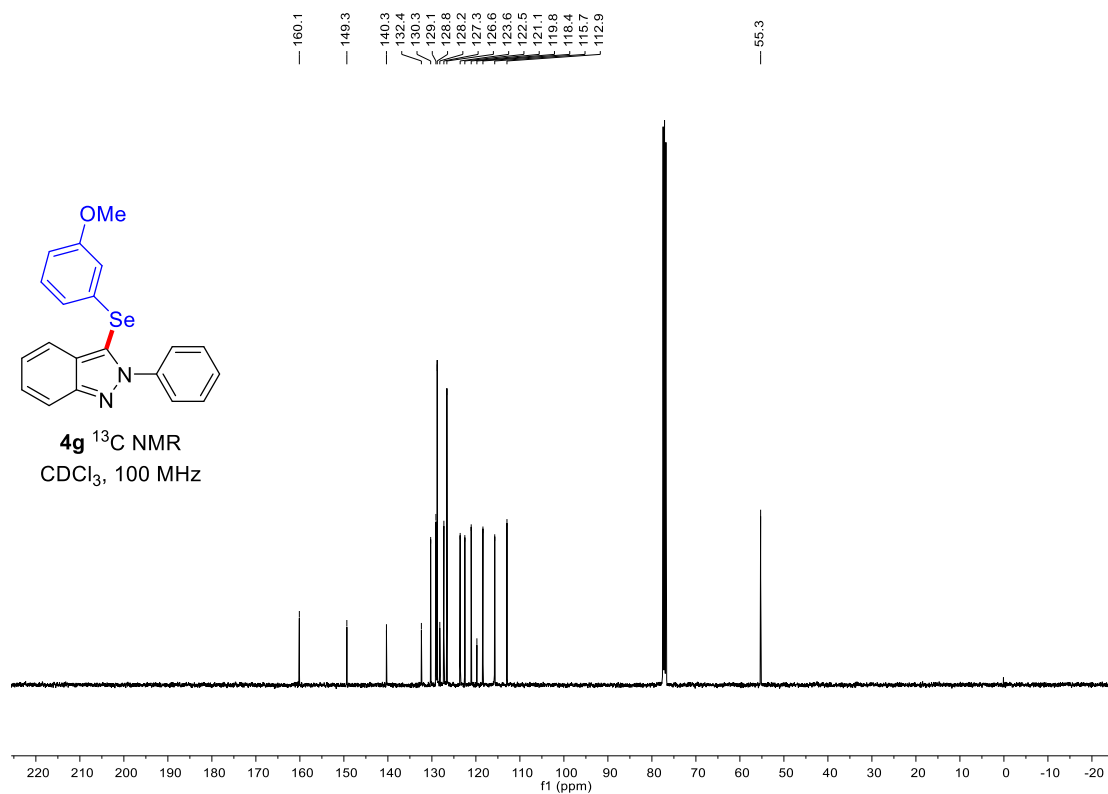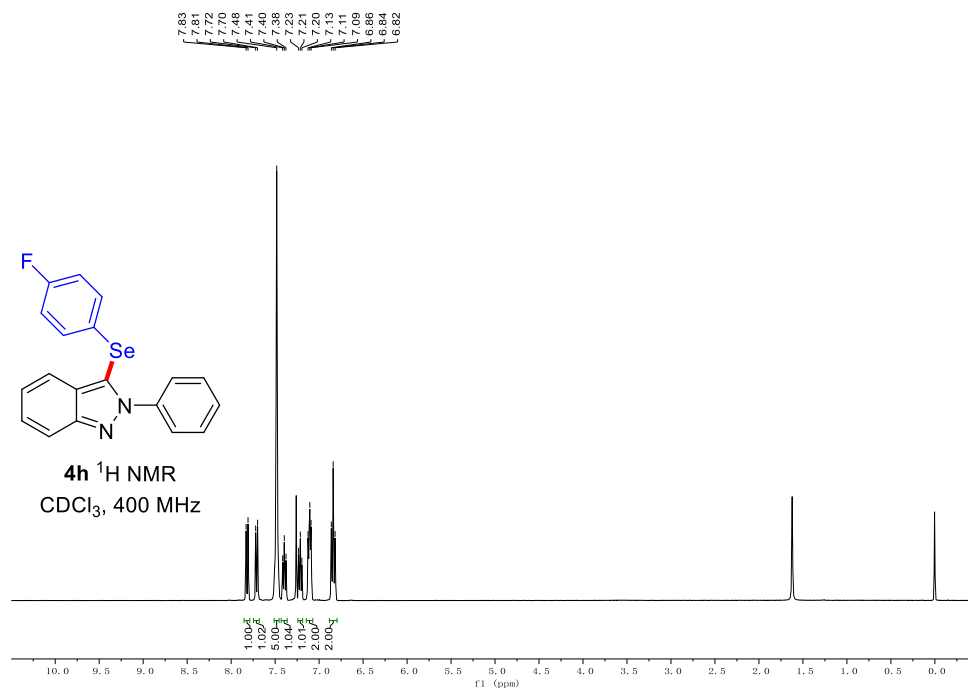

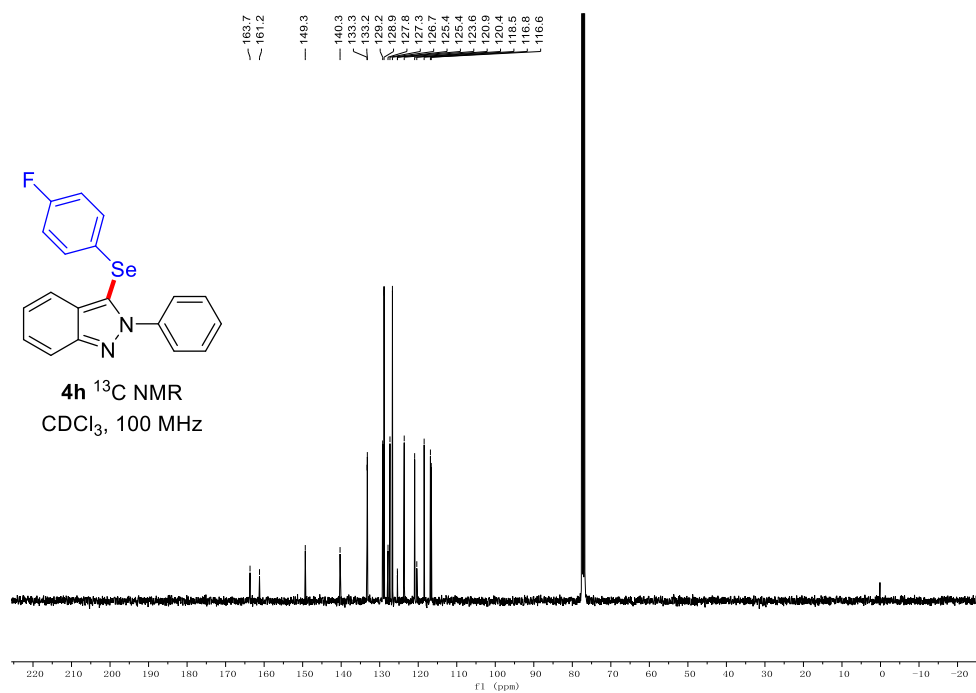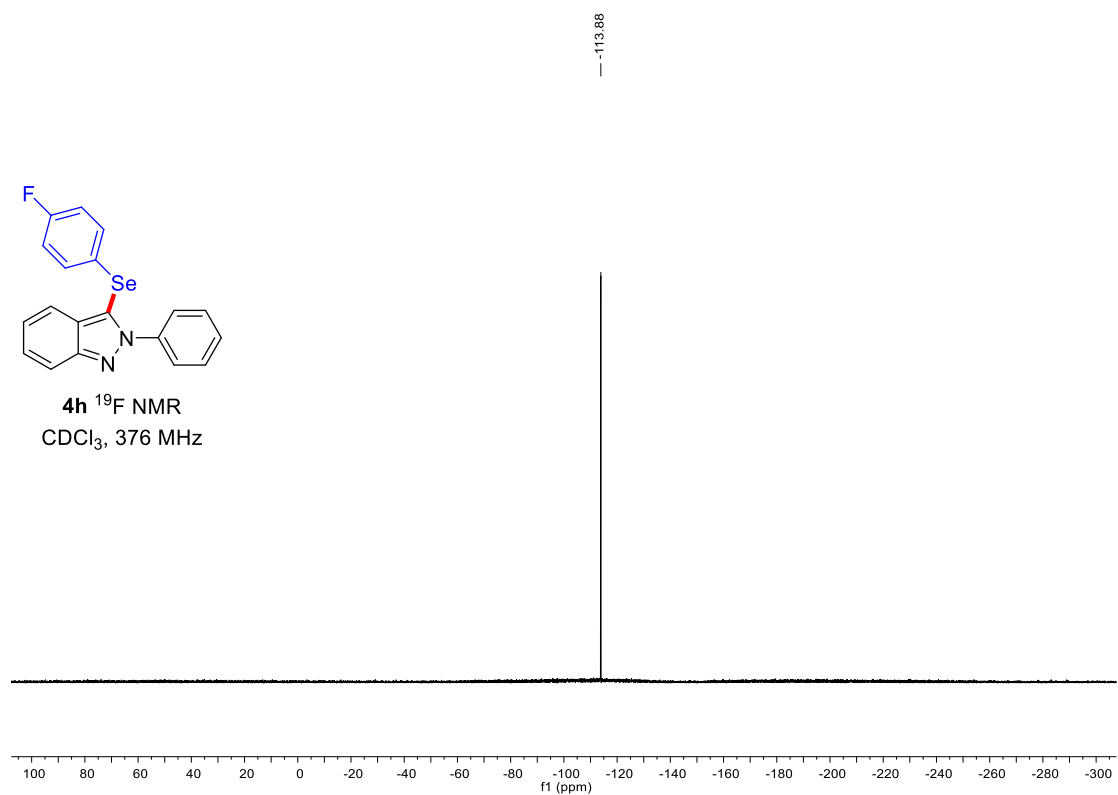

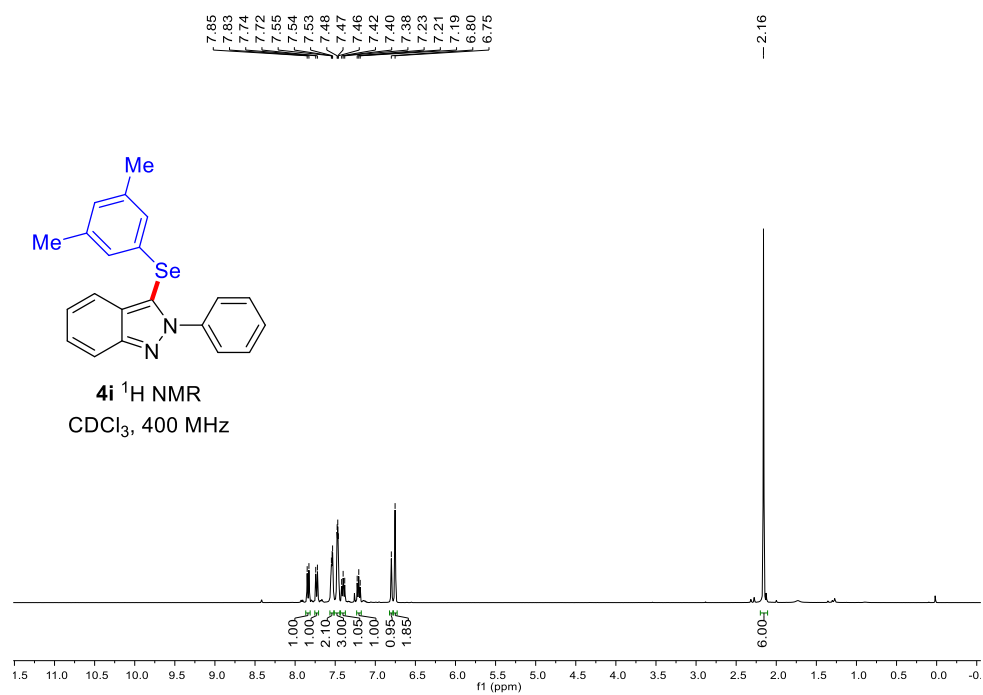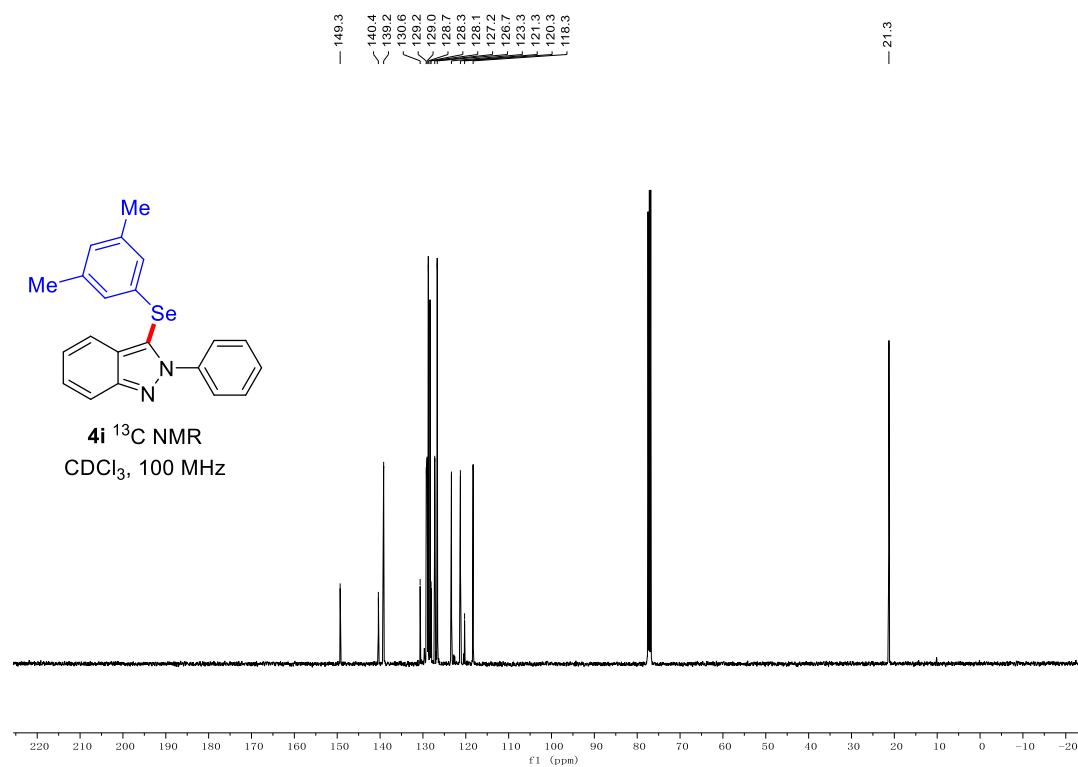

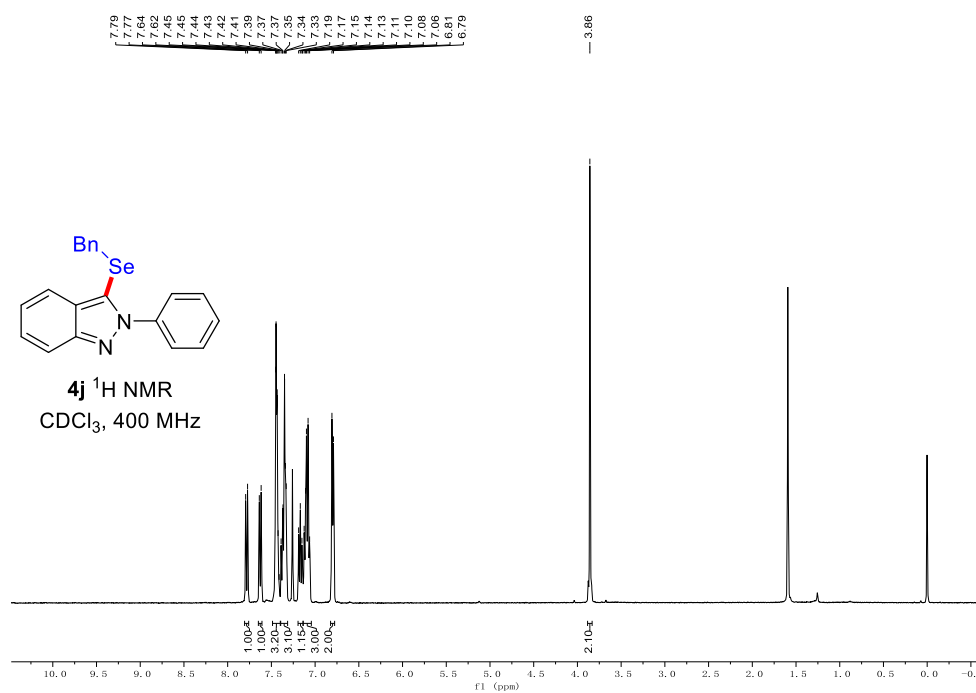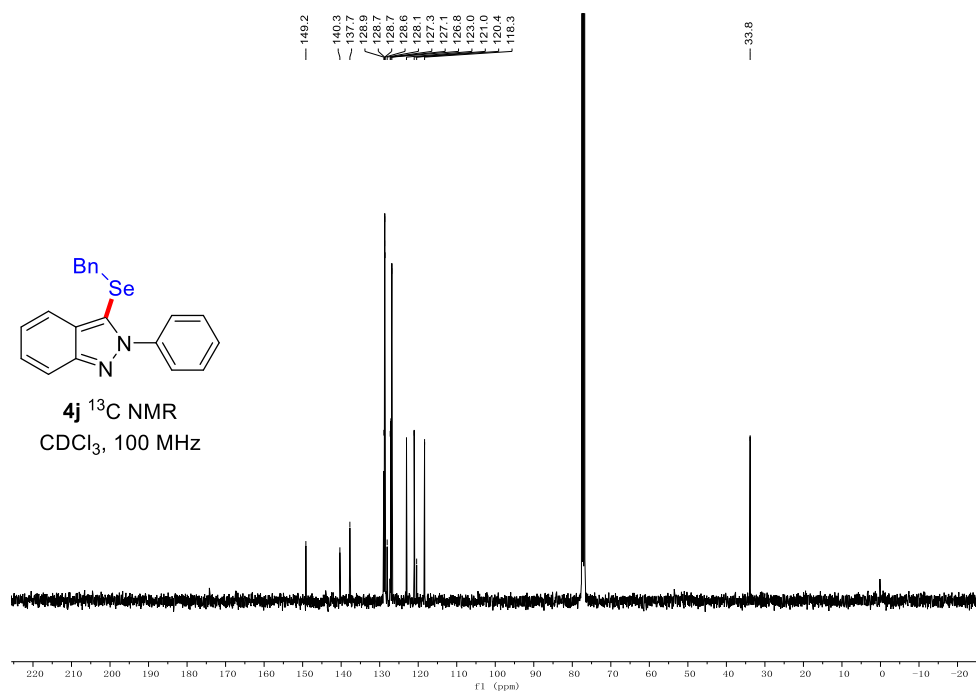

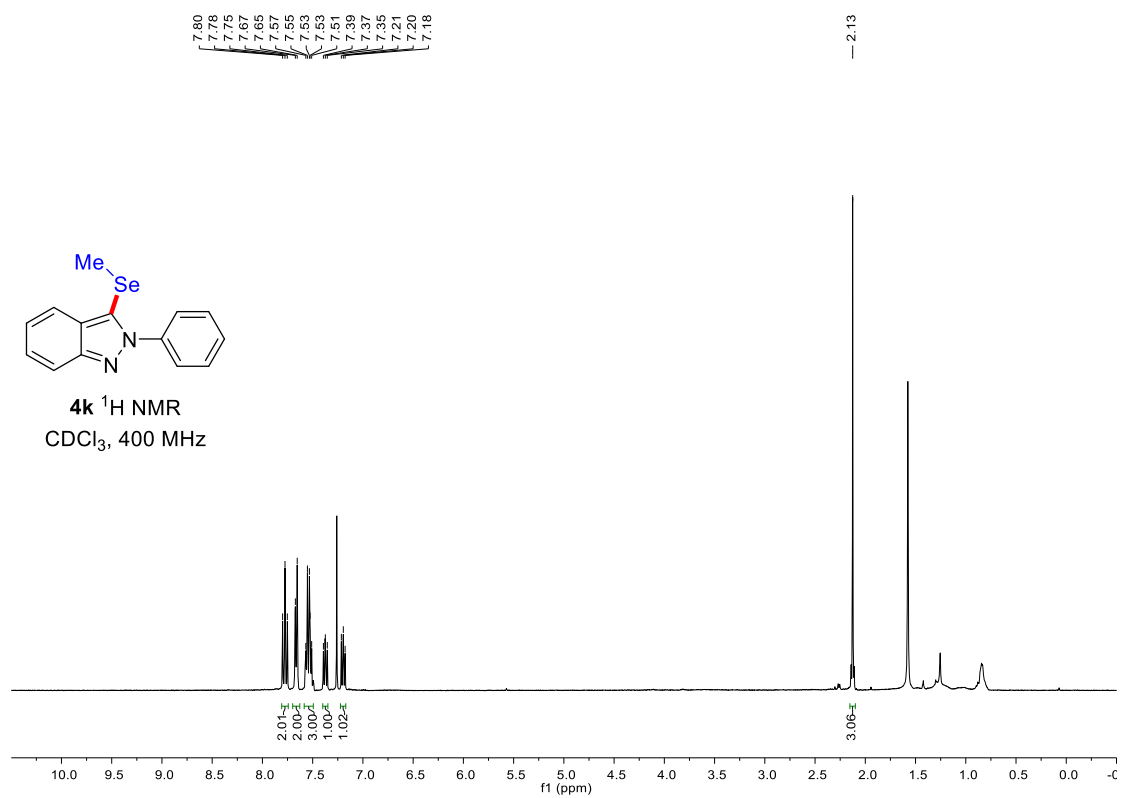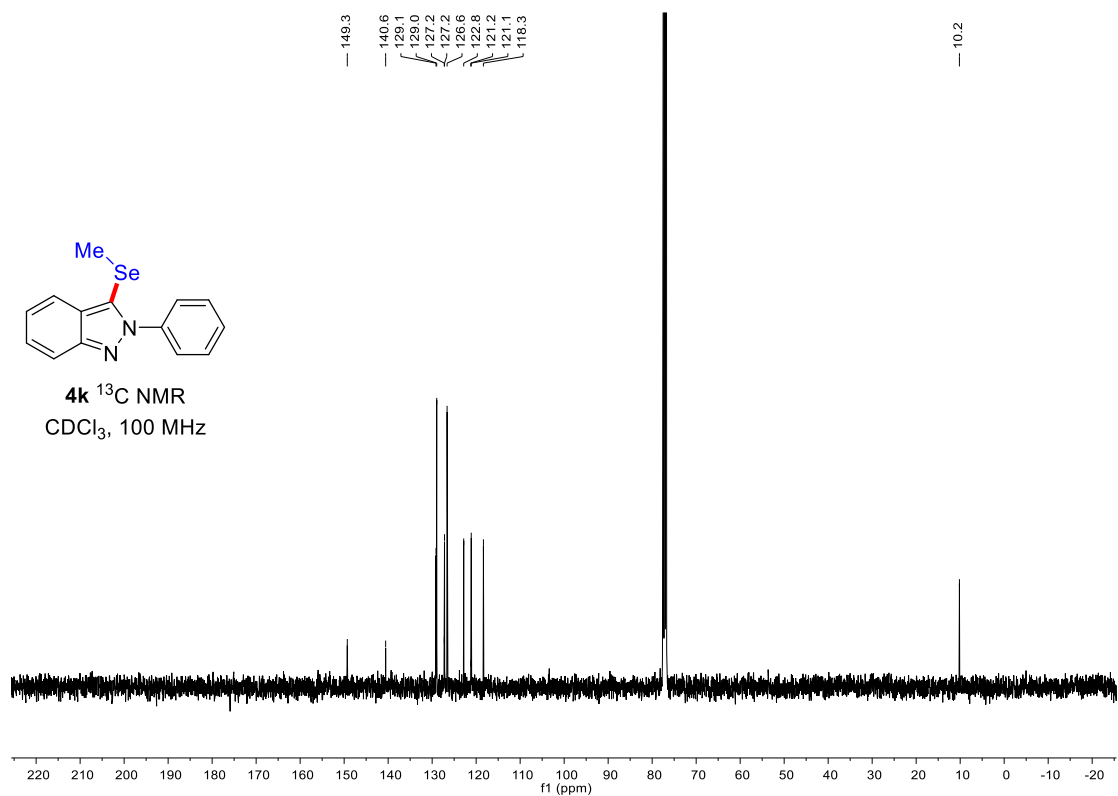

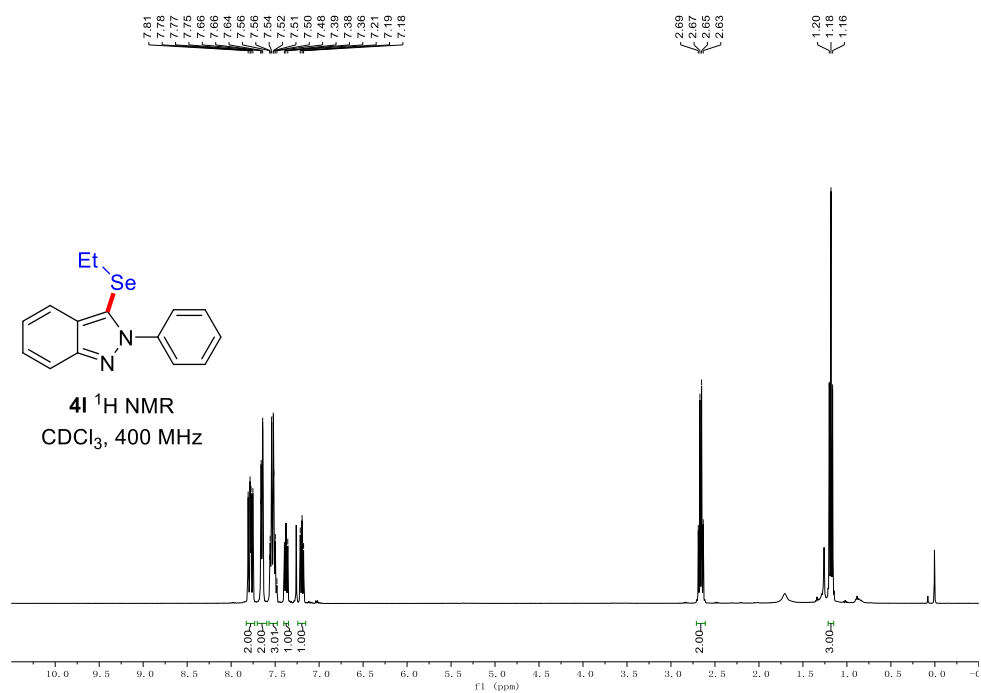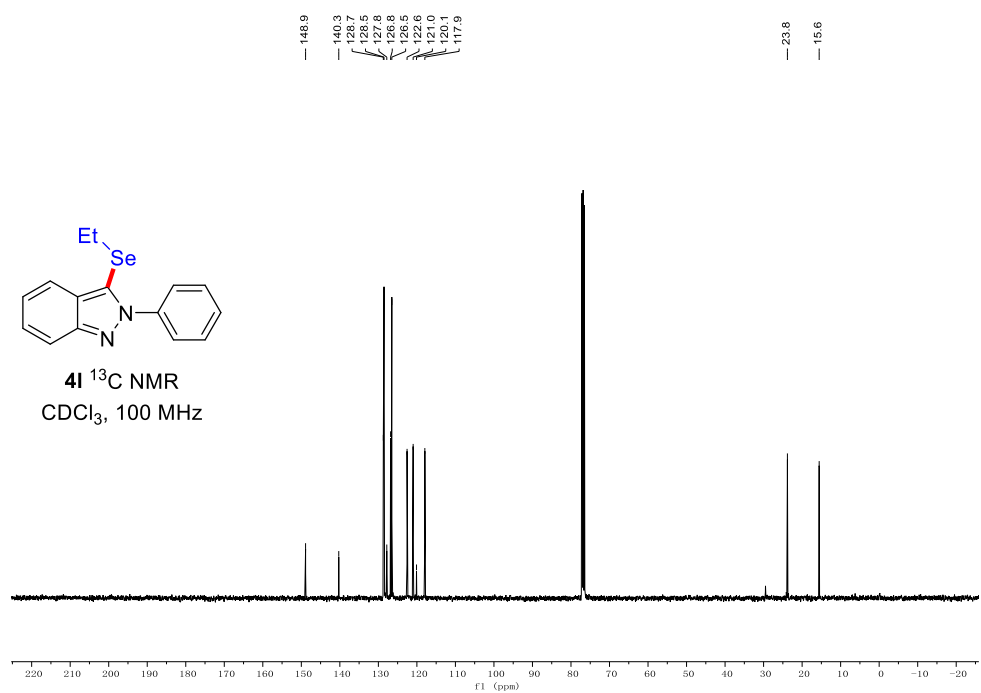

Supplement: d1ob02108g1.pdf [file d1ob02108g1.pdf]
